# Supplementary material for: Deciphering the Impact of Defecation Frequency on Gut Microbiome Composition and Diversity
Source: MDPI journal article supplement (doi:10.3390/ijms25094657), 2024-04-25
Supplement: s1 [file s1]

## Supplementary materials

### Supplementary Figures S1-S7

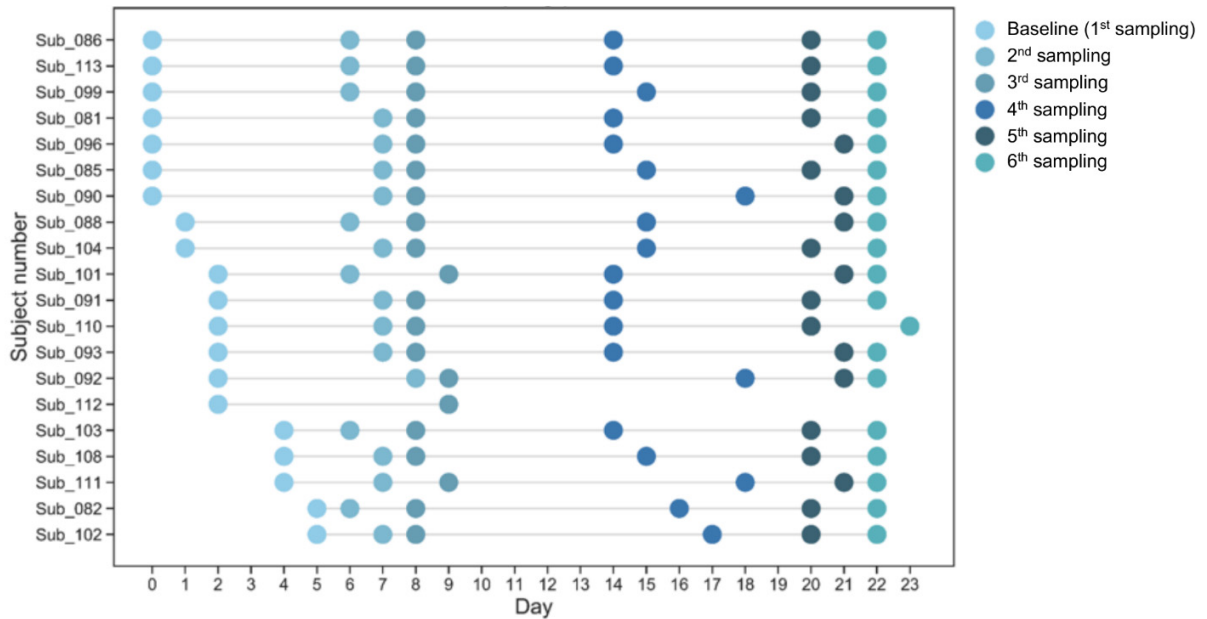

**Figure S1.** The schematic of sampling schedule across all participants. The division into defecation frequency group was based entirely on participants' self-reported defecation frequency per week, as obtained through a questionnaire and all participants were asked to collect fecal samples once or twice weekly based on their natural defecation frequency.

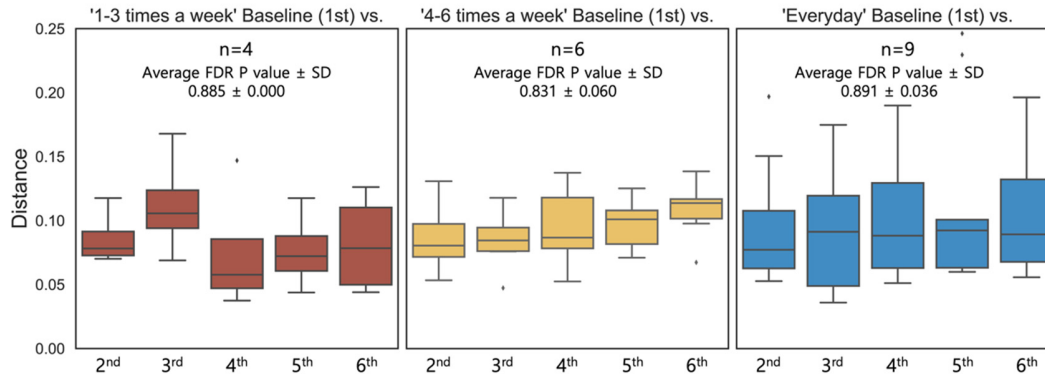

**Figure S2.** Intergroup distance across sampling timepoints within each defecation frequency group based on weighted UniFrac distance. Each sampling timepoint was compared to Baseline sample within each defecation frequency group. Mann-Whitney U test was performed for statistical significance (FDR,  $p < 0.05$ ).

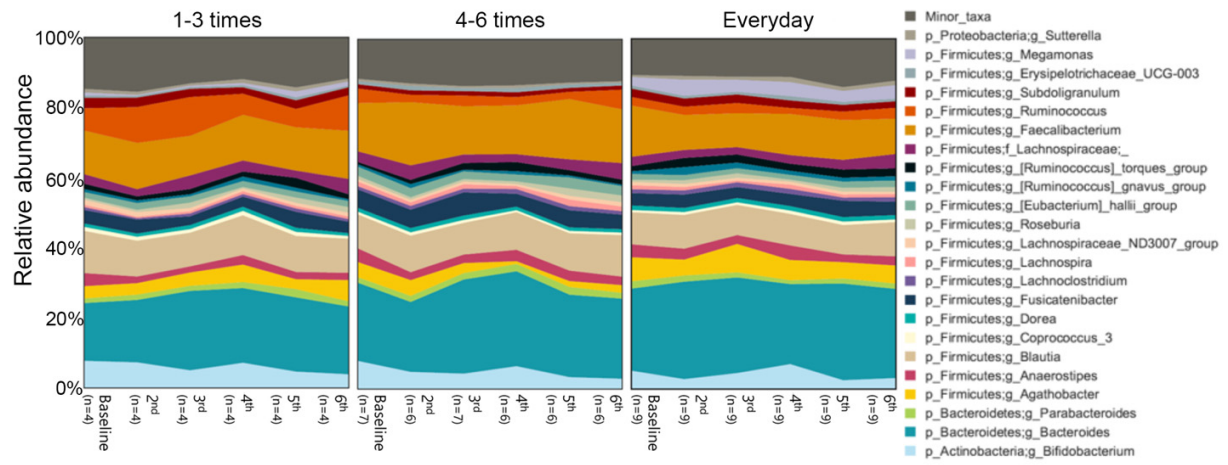

**Figure S3.** Changes in microbial composition at the genus level across different defecation frequency groups over six sampling points.

**A**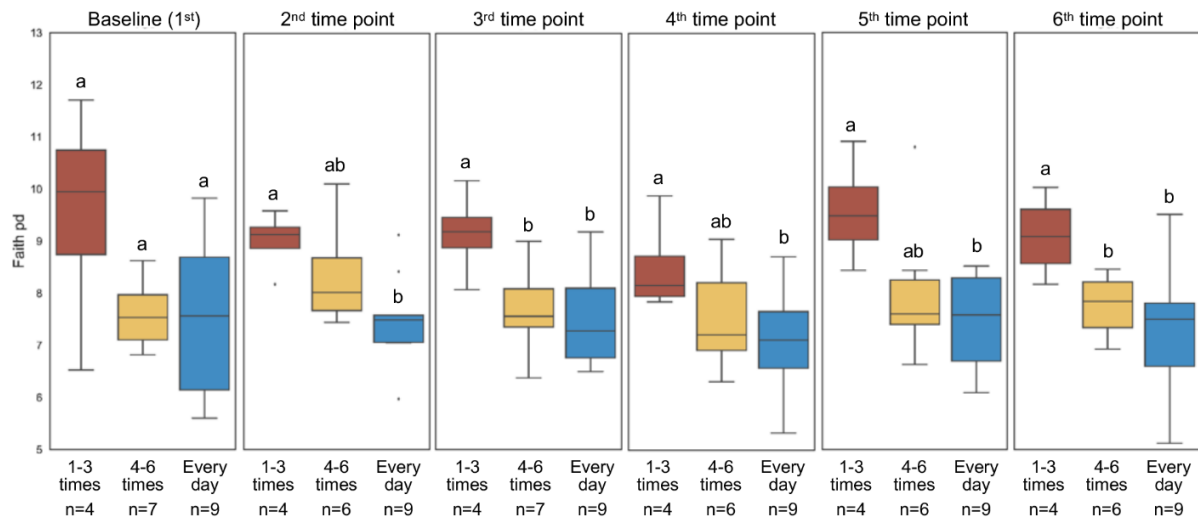**B**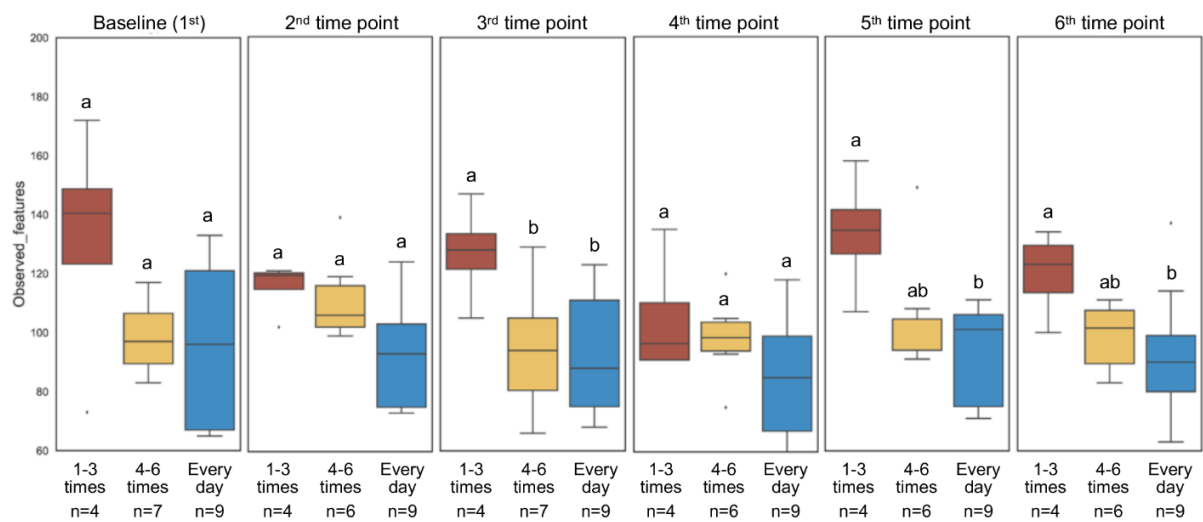

**Figure S4.** Alpha diversity of gut microbiota according to stool frequency at each sampling time point. Box plot of Faith's phylogenetic distance (**A**) and observed features metrics (**B**). The inner line of the boxplots represents the median and the edges of the box are interquartile ranges (IQR). Statistical analysis was conducted using one-way ANOVA with Kruskal-Wallis test.

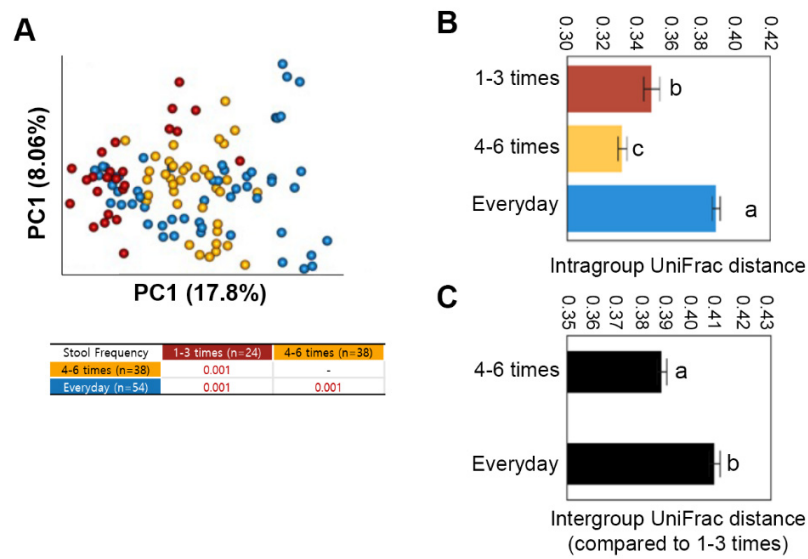

**Figure S5.** Microbial diversity of gut microbiota using unweighted UniFrac distance according to stool frequency. **(A)** PCoA plot based on unweighted UniFrac distance. PERMANOVA was used to test dissimilarity. Intragroup **(B)** and intergroup **(C)** distances using unweighted UniFrac distance across three different groups. Data shown and error bars are mean  $\pm$  SEM (B, one-way ANOVA with Tukey's multiple comparisons; C, non-parametric t-test,  $P < 0.001$ ). Different alphabets indicate significant differences between groups.

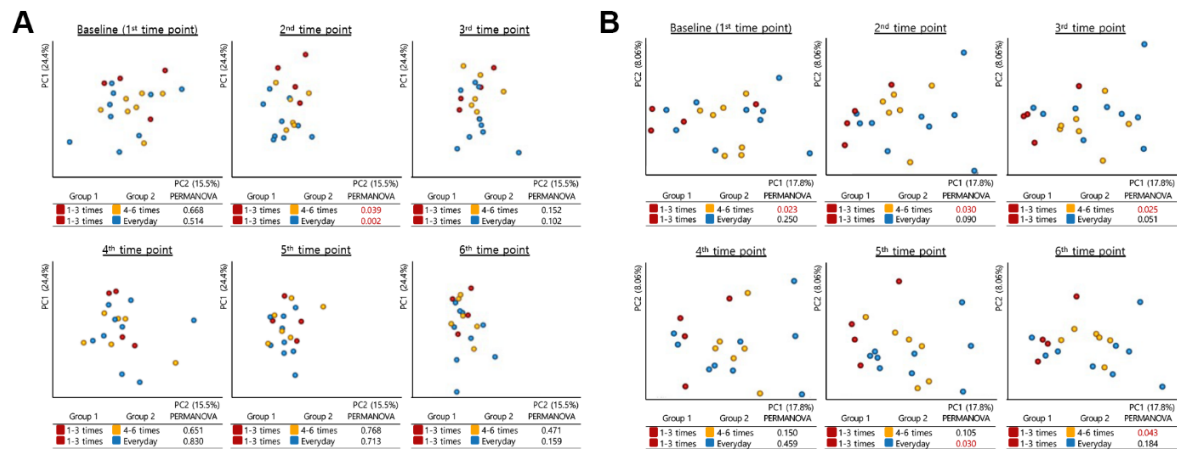

**Figure S6.** PCoA plot of bacterial communities distinguished by stool frequency at each sampling time point using (A) weighted and (B) unweighted UniFrac distances. PERMANOVA was used to test dissimilarity.

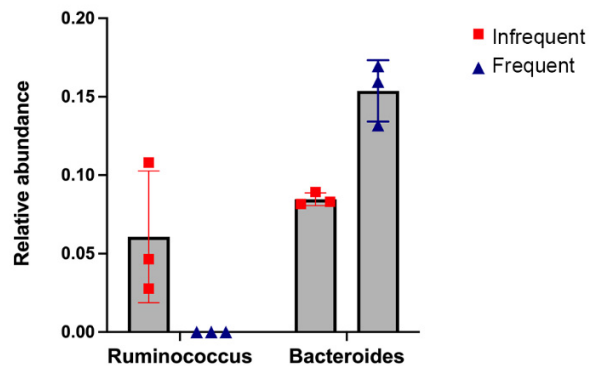

**Figure S7.** Relative abundance of two taxa, *Ruminococcus* and *Bacteroides*, among participants who were subjected to metabolite profiling (Infrequent, n=3 and Frequent, n=3).
