# Supplementary material for: Deciphering the Impact of Defecation Frequency on Gut Microbiome Composition and Diversity
Source: Int J Mol Sci. 2024 Apr 25;25(9):4657. doi: 10.3390/ijms25094657 (PMC11083994; doi:10.3390/ijms25094657)
Supplement: Supplementary file 1 [file ijms-25-04657-s001.zip › Supplementary Dataset.xlsx]

## Sheet: Table S1
Table S1. Metabolites found in LC-MS/MS
Metabolites found in negative mode												Metabolites found in positive mode
		Infrequent group				Frequent group								Infrequent group				Frequent group
Metabolite ID	KEGG ID	sub 1	sub 2	sub 3	Log2(mean of abundance)	sub 1	sub 2	sub 3	Log2(mean of abundance)	Log2(meanFrequent/Infrequent)	1/p-value	Metabolite ID	KEGG ID	sub 1	sub 2	sub 3	Log2(mean of abundance)	sub 1	sub 2	sub 3	Log2(mean of abundance)	Log2(meanFrequent/Infrequent)	1/p value
Ascorbic acid_175.02487_5.616	Yes	11950.4	10654.5	1.0827e+06	15.66	1.2461e+06	1.01559e+06	1.45051e+06	20.22	4.56	9.38491	Palmitoyl ethanolamide_300.28981_14.874	Yes	506641	3.76244e+06	256704	19.59	2.42134e+06	1.89261e+06	2.66829e+06	21.14	1.55	3.8891
L-Lactic acid_89.02443_0.919	Yes	3.79564e+08	1.12951e+08	3.97541e+08	27.94	1.73504e+08	3.05932e+08	2.08857e+08	27.73	-0.21	1.31023	Aspartame_295.12894_1.559	Yes	4.30341e+07	3.62373e+07	2.0418e+07	24.92	2.22955e+07	3.621e+07	1.08502e+07	24.3	-0.62	2.77861
2-Oxobutyric acid_101.02445_0.846	Yes	2.18867e+07	8.61665e+06	9.79551e+06	23.55	2.41908e+07	1.03066e+07	2.22614e+07	24.08	0.53	2.44126	Metharbital_199.1077_1.409	Yes	3.26749e+07	2.61576e+07	1.1414e+07	24.35	2.27717e+07	7.66238e+06	1.80076e+07	23.8	-0.55	2.1829
L-Malic acid_133.01431_1.243	Yes	7.22194e+06	768360	1.52592e+07	22.07	2.75988e+06	8.34335e+06	1.27766e+07	22.67	0.6	1.42576	Oleoyl ethanolamide_326.30552_15.175	Yes	452297	2.09986e+06	367152	19.42	3.57917e+06	1.08879e+06	1.05163e+06	20.61	1.19	3.39532
Succinic acid_117.01936_1.15	Yes	4.56653e+08	5.40458e+08	3.60158e+08	28.73	8.52123e+08	2.35805e+08	1.74217e+08	28.29	-0.44	1.75879	L-Prolinamide_115.08651_0.875	Yes	130890021	6.85146e+07	5.88003e+06	25.16	8.6865e+07	1.20997e+08	1.0786e+08	26.64	1.48	2.92129
Pyruvic acid_87.00876_0.866	Yes	8.40145e+06	3.35335e+06	1.5448e+06	21.75	2.45578e+06	1.28447e+07	1.97526e+06	21.92	0.17	1.1316	Naphthalenediamine_159.09168_2.682	Yes	2.03449e+07	1.28248e+07	1.67411e+07	23.96	5.12002e+06	8.18154e+06	8.67269e+06	22.77	-1.19	55.9159
Glycolic acid_75.00877_19.728	Yes	4.84105e+08	5.55678e+08	3.70169e+08	28.79	8.62067e+08	2.5301e+08	1.87669e+08	28.36	-0.43	1.74969	Hydroxyquinoline_146.06004_2.71	Yes	4.77925e+07	3.00256e+07	3.51578e+07	25.14	1.16517e+07	6.15921e+07	6.68366e+07	25.11	-0.03	1.02205
Glutaric acid_131.03505_0.837	Yes	6.31006e+06	5.24187e+06	6.01534e+06	22.48	9.78285e+06	5.19983e+06	3.63616e+06	22.44	-0.04	1.06589	Dimethoxybenzidine_245.12852_6.548	Yes	7.55875e+07	5.98546e+07	4.88369e+07	25.85	6.83905e+07	4.92803e+07	5.23841e+07	25.74	-0.11	1.49876
5-Aminovaleric acid_116.07177_0.905	Yes	5.64568e+07	5.09573e+07	3.41603e+07	25.46	4.86457e+07	5.33637e+07	4.60519e+07	25.55	0.09	1.42324	Dihydroxyquinoline_162.05498_4.649	Yes	452337	4.1164e+06	1.15063e+06	20.3	1.37506e+06	164819	2.08403e+06	19.57	-0.73	1.55034
trans-Cinnamic acid_147.04525_1.639	Yes	3.01249e+07	2.38951e+07	2.00618e+07	24.54	1.2375e+07	1.33132e+07	1.17725e+07	23.57	-0.97	180.31	D-lysine_147.11282_0.734	Yes	1.54156e+08	1.30982e+08	1.22446e+08	27.01	3.30172e+07	1.23745e+08	1.14153e+08	26.21	-0.8	3.72458
Cyclohexanecarboxylic acid_127.07651_5.651	Yes	679484	420995	2.38086e+06	19.75	3.67814e+06	2.2691e+06	2.43347e+06	21.38	1.63	9.68204	HOTrE_295.22698_11.472	Yes	3.53686e+07	9.24539e+06	4.59759e+07	24.56	1.22525e+07	6.38609e+06	9.99906e+06	23.14	-1.42	7.24165
Suberic acid_173.08199_6.41	Yes	6.52422e+06	1.55127e+07	6.16971e+06	23.03	1.57617e+07	1.20748e+07	3.8332e+06	23.1	0.07	1.07958	Docosahexaenoic acid ethyl ester_357.27888_11.96	Yes	1924728974	9.92899e+08	1134405343	30.27	3059711415	1900455938	1736776955	31.01	0.74	7.8136
Adipic acid_145.0507_2.456	Yes	5.13294e+06	3.25976e+06	1.52838e+06	21.49	3.05744e+06	3.61659e+06	4.1515e+06	21.77	0.28	1.61089	9-Oxo-ODE_295.22691_13.498	Yes	5.43121e+07	6.64976e+07	5.24337e+07	25.78	1.16206e+08	1.07671e+08	1.72085e+08	26.94	1.16	130.668
6-Hydroxycaproic acid_131.07141_5.565	Yes	2.58926e+06	1.01745e+07	4.10096e+06	22.18	7.59001e+06	1.96465e+06	2.53583e+06	21.68	-0.5	1.7323	Tributyl phosphate_267.17205_12.694	Yes	7.82628e+06	7.7017e+06	1.17926e+06	21.98	343243	3.79628e+06	3.04068e+06	20.59	-1.39	2.58654
Pantothenic acid_218.10349_1.829	Yes	8.0369e+06	4.03896e+06	7.52529e+06	22.58	5.76987e+06	1.03797e+07	7.153e+06	22.85	0.27	1.85876	Trenbolone_271.16932_9.751	Yes	237594	2.85712e+06	288371	19.15	1.13625e+06	116996	55759.6	17.57	-1.58	2.39473
4-Hydroxybutyric acid_103.04011_1.245	Yes	2.16615e+07	1.38076e+07	1.19892e+07	23.87	2.97705e+07	1.66446e+07	2.25078e+07	24.41	0.54	5.06501	Methyl pyrrolidone_100.07549_1.635	Yes	5.13851e+08	2385221543	3.59659e+08	29.5	6203955969	9.36109e+08	1.5115e+08	29.83	0.33	1.16305
Valeric acid_101.0608_6.544	Yes	982165	1.80283e+06	217274	19.47	304893	120514	297311	17.76	-1.71	6.06966	Cyclohexanecarboxylic acid_129.09098_6.895	Yes	1.09643e+06	1.27878e+06	9.09884e+07	22.26	127347712	1.11916e+08	6.37614e+07	26.53	4.27	8.8171
Butyric acid_87.04517_4.125	Yes	658739	547290	269634	18.81	931790	167968	453456	18.66	-0.15	1.15994	Eleostearic acid_279.23199_13.963	Yes	4.08297e+07	1.24142e+08	2.01345e+07	25.48	7.58244e+07	1.11687e+08	1.52772e+08	26.7	1.22	4.77088
Propionic acid_73.02953_1.220	Yes	1.15681e+08	1.04191e+08	5.50368e+07	26.38	1.34998e+08	5.88039e+07	4.30873e+07	26.06	-0.32	1.61086	Tiglic acid_118.08615_0.893	Yes	1784074304	2068971098	1311767434	30.66	1106418169	1060680915	1119079929	30.03	-0.63	30.8976
Acetic acid_59.10385_0.861	Yes	6.759e+06	6.88947e+06	8.66168e+06	22.82	1.40192e+07	6.44535e+06	9.89028e+06	23.2	0.38	3.04543	Amobarbital_227.13905_5.345	Yes	2.25171e+08	2.01706e+08	1.98243e+08	27.63	2.4158e+08	1.81901e+08	2.31185e+08	27.69	0.06	1.43087
Pimelic acid_159.06637_5.087	Yes	3.11744e+06	3.28991e+06	1.77599e+06	21.33	3.4073e+06	3.01004e+06	1.26806e+06	21.17	-0.16	1.2894	Caffeine_195.08755_4.877	Yes	645966	4.34028e+06	137599	19.47	1.03878e+06	148790	374160	18.56	-0.91	1.63918
3-Ureidopropionic acid_131.04626_0.791	Yes	3.20472e+06	1.72146e+06	407879	20.32	2.26274e+06	420624	1.51778e+06	20.11	-0.21	1.16085	Acetyl-β-methylcholine_160.13323_0.894	Yes	7.17694e+07	1.59643e+08	2.46063e+07	25.97	7.81959e+07	3.3802e+07	1.48259e+06	23.91	-2.06	2.92533
5-Hydroxyindole-3-acetic acid_190.05108_5.894	Yes	1.99626e+06	2.88135e+06	1.16379e+06	20.85	545069	2.57172e+06	3.71054e+06	20.72	-0.13	1.10813	Acetophenone_121.06473_1.163	Yes	1.07208e+08	9.1824e+07	6.63393e+07	26.37	2.34037e+08	7.42381e+07	7.55178e+07	26.71	0.34	1.67534
Dodecanedioic acid_229.14459_9.445	Yes	6.94528e+06	3.86638e+06	4.23056e+06	22.21	2.66689e+06	4.5224e+06	2.97762e+06	21.65	-0.56	5.28318	Solanidine_398.34199_9.469	Yes	3.30789e+06	104890	61010.7	18.08	3.05941e+06	97041.4	1.15805e+06	19.42	1.34	1.67611
Hydrocinnamic acid_149.06079_8.374	Yes	113493	153620	198952	17.21	34491	32759.6	59961.1	15.32	-1.89	153.046	α-Linolenic acid_279.23199_11.549	Yes	1.26704e+08	1.39297e+08	2.5836e+07	26.2	6.26652e+07	9.25839e+07	8.23605e+07	26.22	0.02	1.02139
Azelaic acid_187.09759_7.344	Yes	2.40669e+07	8.06301e+07	2.33966e+07	25.09	9.24493e+07	7.50415e+07	2.40465e+07	25.71	0.62	2.0037	Cytarabine_266.07484_0.919	Yes	2.06264e+07	6.23754e+06	6.53492e+07	24.28	1.4309e+07	1.53323e+07	4.57033e+07	24.36	0.08	1.06011
L-Histidine_154.06229_0.777	Yes	9.49645e+06	8.13367e+06	8.574e+06	23.06	1.26392e+07	1.03886e+07	6.09105e+06	23.15	0.09	1.26303	Putrescine_89.10721_0.845	Yes	8.22967e+06	8.61006e+06	4.96354e+06	22.75	1.25585e+08	2.49489e+06	333705	22.17	-0.58	1.20682
Threonine_118.05102_0.808	Yes	2.03041e+07	3.88933e+06	1.88119e+07	23.44	2.07513e+07	2.29226e+07	1.73636e+07	24.27	0.83	2.83273	Isobutyric acid_89.05958_4.09	Yes	3.14903e+07	3.4345e+07	2.27842e+07	24.79	1.29448e+08	2.68408e+07	1.72778e+07	25.22	0.43	1.5173
L-Phenylalanine_206.08231_6.53	Yes	2.24861e+08	1.48738e+08	1.76649e+08	27.43	1.44205e+08	1.55241e+08	1.3662e+08	27.11	-0.32	6.44621	D-Arginine_175.11891_0.856	Yes	1672551603	3.68175e+07	1148495204	28.62	6.52129e+07	1.21717e+08	3.44156e+08	27.06	-1.56	2.20523
L-Serine_104.03533_0.783	Yes	5.08962e+06	1.41859e+06	1.68114e+07	22.24	1.96683e+06	8.37849e+06	1.40976e+07	22.55	0.31	1.20972	L-Pyroglutamic Acid_130.04984_1.314	Yes	2.23672e+07	1.82498e+07	2.81335e+07	24.43	7.17833e+06	9.75031e+06	9.07654e+06	23.04	-1.39	291.375
β-Alanine_88.0404_0.819	Yes	1.52536e+07	1.32217e+07	1.17882e+07	23.67	1.47137e+07	1.93384e+07	1.54038e+07	23.96	0.29	6.91357	2-Naphthylamine_144.08079_4.411	Yes	1.5367e+07	2.88729e+06	2.18384e+06	22.13	1.26704e+07	212709	1.3708e+06	20.56	-1.57	2.18031
L-Tyrosine_180.06676_1.078	Yes	3.74965e+07	3.1799e+07	2.74502e+07	24.93	3.11259e+07	3.49201e+07	3.88173e+07	25.05	0.12	2.05802	Glycyl-L-leucine_189.12336_1.815	Yes	8.04095e+08	2.77984e+08	4.49664e+08	28.79	2.82754e+08	2.81729e+08	3.126e+08	28.12	-0.67	4.83866
Uracil_111.02007_0.976	Yes	1.11146e+08	9.58924e+07	5.48753e+07	26.32	8.72245e+07	6.68732e+07	4.15087e+07	25.89	-0.43	2.56069	Hydroxyindole_134.06003_6.182	Yes	1.22256e+07	465019	2.34714e+06	21.18	2.9949e+07	455179	266673	20.55	-0.63	1.22221
Adenine_134.0473_0.952	Yes	5.30317e+06	1.95682e+07	2.3613e+07	23.68	1.28422e+07	4.05789e+07	6.57442e+06	23.85	0.17	1.13318	Acetylcholine_146.11759_0.857	Yes	2.91536e+07	4.91321e+06	1.05363e+07	23.45	4.34687e+07	1.20498e+08	1.39258e+07	25.32	1.87	5.39654
Guanine_150.04222_0.948	Yes	2.35614e+06	675377	9.58587e+06	21.24	3.88318e+06	4.6972e+06	1.79898e+06	21.61	0.37	1.29671	L-Norleucine_132.10187_5.31	Yes	7.09022e+07	4.56071e+07	8.24836e+07	25.94	6.6842e+07	4.0934e+07	4.54324e+07	25.57	-0.37	2.99099
Thymidine_241.08307_1.456	Yes	8.47408e+07	2.54168e+07	9.88181e+07	25.83	6.76127e+07	1.60107e+08	6.16464e+07	26.38	0.55	1.96449	D-Pyroglutamic acid_130.04985_1.04	Yes	3.4143e+07	3.55335e+07	1.68216e+07	24.7	6.44234e+06	5.83779e+07	4.70159e+07	24.63	-0.07	1.0507
Adenosine_266.08964_1.202	Yes	1.1305e+07	4.49388e+06	1.68174e+07	23.18	1.03018e+07	3.03729e+07	9.15701e+06	23.76	0.58	1.99494	L-Methionine_150.05832_1.276	Yes	7.73804e+07	5.7906e+07	5.48089e+07	25.9	2.63298e+07	2.06927e+07	1.60219e+07	24.3	-1.6	293.427
L-Aspartic acid_132.03028_0.778	Yes	1.36706e+07	8.27376e+06	2.96139e+07	23.83	1.27603e+07	3.59647e+07	3.20913e+07	24.55	0.72	2.66515	Kynurenic acid_190.04984_3.236	Yes	3.24301e+06	2.67917e+06	1.66844e+06	21.22	9.99936e+06	966914	850390	20.94	-0.28	1.20481
L-Glutamic acid_146.04595_0.803	Yes	5.4146e+07	2.525e+07	4.81774e+07	25.27	4.3629e+07	4.91268e+07	4.70499e+07	25.47	0.2	1.70776	D-Ornithine_133.09713_0.736	Yes	1.583e+07	6.49844e+07	1.83724e+07	24.67	6.70022e+06	3.21315e+07	5.76181e+06	23.36	-1.31	3.71012
L-Cystine_239.01671_0.764	Yes	1.05333e+07	661375	1.03261e+07	21.99	1.90177e+07	1.92259e+07	2.00417e+07	24.21	2.22	5.91656	Chalcone_209.09606_12.961	Yes	8.94083e+06	7.4301e+06	8.65812e+06	22.99	8.5211e+06	1.66966e+07	2.07464e+07	23.77	0.78	8.51941
Uridine_243.06237_1.069	Yes	1.32858e+07	2.32646e+06	4.74949e+07	23.44	3.37734e+07	1.01258e+08	7.95387e+07	25.95	2.51	7.33622	L-Alanine_90.05484_0.781	Yes	3.55939e+07	3.07495e+07	2.54128e+07	24.85	1.29929e+07	2.78934e+07	2.65541e+07	24.34	-0.51	3.94549
Phenylacetic acid_135.04519_7.281	Yes	1.34835e+06	447981	304839	19.12	643519	223032	511822	18.68	-0.44	1.64731	Oxo phytodienoic acid_293.2113_12.345	Yes	1.31184e+07	1.05751e+08	1.01942e+07	24.53	4.10672e+07	1.0341e+08	1.49892e+08	26.36	1.83	4.91802
Ornithine_131.08264_0.823	Yes	1.32714e+07	8.74988e+06	1.20353e+07	23.41	1.85566e+07	9.72308e+06	7.95975e+06	23.43	0.02	1.0245	trans-4-Hydroxy-L-proline_132.06552_2.209	Yes	3.98658e+08	2.84974e+08	1.55179e+08	27.96	7.5973e+07	1.12788e+08	8.91731e+07	26.45	-1.51	40.1252
4-Oxoproline_128.03537_0.915	Yes	1.87221e+08	1.83383e+08	1.89894e+08	27.48	1.55626e+08	1.52896e+08	2.16988e+08	27.36	-0.12	1.87378	N8-Acetylspermidine_188.1757_0.868	Yes	5.79331e+06	2.7264e+06	3.45675e+06	21.86	4.68771e+07	2.55858e+06	6.50109e+06	23.13	1.27	2.67662
Glycyl-L-leucine_232.04703_0.8	Yes	1.01103e+08	4.03754e+07	6.04769e+07	25.9	6.00465e+07	5.13915e+07	7.60223e+07	25.88	-0.02	1.04611	Urocanic acid_139.05021_0.901	Yes	4.62472e+07	2.4069e+07	4.77985e+07	25.16	4.45675e+07	2.87332e+07	3.8406e+07	25.13	-0.03	1.08234
L-Arginine_173.10448_0.838	Yes	2.0799e+07	1.0734e+06	6.73694e+06	22.34	6.30513e+06	2.31657e+07	1.77693e+07	23.71	1.37	2.67041	L-Proline_116.07051_3.495	Yes	6.29234e+07	2.90292e+07	5.39722e+07	25.46	3.46853e+07	5.5736e+07	4.35805e+07	25.39	-0.07	1.16639
β-Leucine_130.08741_1.264	Yes	8.9063e+09	8.12704e+09	7.42835e+09	32.92	3.18869e+09	5.51199e+09	5.2681e+09	32.07	-0.85	30.4934	4-Hydroxybenzaldehyde_123.04399_1.056	Yes	2.75978e+07	2.92972e+07	2.14657e+07	24.63	8.08133e+06	2.97615e+07	2.21445e+07	24.06	-0.57	2.5841
N-Acetyl-L-methionine_190.05444_3.306	Yes	3.14286e+06	5.71245e+06	2.81984e+06	21.82	5.28725e+06	1.6935e+06	2.02989e+06	21.33	-0.49	2.18488	2'-Deoxyadenosine_252.10918_1.137	Yes	1.1198e+07	2.64036e+07	5.5828e+07	24.6	7.91858e+06	6.11237e+07	2.51226e+08	25.56	0.96	1.72533
N-Acetyl-L-phenylalanine_206.08231_6.53	Yes	5.01341e+06	6.76158e+06	3.47743e+06	22.23	3.4088e+06	2.98141e+06	3.9605e+06	21.71	-0.52	6.18093	Pyridoxamine_169.0971_1.493	Yes	9.62524e+07	8.8006e+07	8.41358e+07	26.41	1.13708e+08	3.90828e+07	6.359e+07	25.97	-0.44	2.64637
Stercobilin_593.33522_8.25	Yes	408849	8163.9	2.59844e+06	17.65	287452	9500.74	7264.67	14.72	-2.93	2.61035	L-Cystine_241.03121_0.745	Yes	5.78451e+07	1.58295e+06	9.33814e+07	24.29	9.91112e+06	9.05722e+07	1.00079e+08	25.42	1.13	1.59495
Pentose_149.04561_0.85	Yes	1.33935e+07	1.199e+07	1.27691e+07	23.6	4.84082e+06	8.25654e+06	8.43354e+06	22.73	-0.87	32.2799	Indole_118.06504_9.066	Yes	2.33015e+07	1.95645e+07	1.87705e+07	24.29	9.95638e+06	9.62096e+06	8.94835e+06	23.18	-1.11	2114.16
Hexose_179.05622_0.811	Yes	5.3221e+07	3.28283e+07	4.40875e+07	25.34	2.27282e+07	2.38169e+07	1.70416e+07	24.32	-1.02	63.8774	Pipecolic acid_130.08624_0.979	Yes	1.97115e+08	1.80482e+08	1.86352e+08	27.49	8.59335e+07	1.36136e+08	1.61531e+08	26.88	-0.61	10.7883
Saccharin_181.99185_2.367	Yes	327301	196922	24658	16.83	1.92771e+06	257584	915927	19.55	2.72	7.79964	L-Isoleucine_132.10187_2.124	Yes	2.76025e+08	2.96489e+08	2.42734e+08	28.01	1.11842e+08	9.13475e+07	2.14988e+08	26.95	-1.06	19.908
4-Methylphenol_107.05026_5.32	Yes	1.16375e+06	1.56447e+06	1.3046e+06	20.35	172823	578953	279077	18.21	-2.14	66.9299	Cytosine_112.05044_0.941	Yes	4.7309e+07	1.13544e+07	1.17952e+08	25.25	3.44887e+07	6.57436e+07	8.41387e+07	25.78	0.53	1.55837
4-Hydroxyphenyllactic acid_181.05074_2.658	Yes	2.1252e+06	1.65052e+06	2.00286e+06	20.87	1.92613e+06	1.69716e+06	927979	20.47	-0.4	3.28373	2'-Deoxyguanosine_268.10409_1.137	Yes	3.49276e+07	1.03706e+07	4.2639e+07	24.57	4.9936e+06	5.01394e+07	138719474	24.96	0.39	1.22776
Epinephrine_182.08231_6.104	Yes	1.18918e+06	1.10757e+06	612367	19.83	1.07719e+06	462554	1.2853e+06	19.72	-0.11	1.17759	Sphingosine_300.28988_12.656	Yes	1.48047e+07	1.18833e+08	1.60827e+07	24.86	5.18113e+07	1.63854e+07	8.83651e+07	25.33	0.47	1.38989
Xanthosine_283.06859_1.271	Yes	2.4056e+06	977415	627290	20.12	2.55022e+06	4.03559e+06	1.55089e+06	21.26	1.14	5.7103	Hypoxanthine_137.04577_1.162	Yes	3.08383e+08	2.2308e+08	4.75383e+08	28.25	1.07539e+08	3.42008e+08	4.27595e+08	27.9	-0.35	1.56655
2'-Deoxyinosine_251.07871_1.213	Yes	2.86224e+07	1.07466e+07	3.10629e+07	24.34	1.57514e+07	6.02455e+07	2.07309e+07	24.69	0.35	1.48213	Nicotinic acid_124.03925_1.024	Yes	4.68746e+07	2.81173e+07	4.37734e+07	25.2	2.69239e+07	5.66924e+07	4.61106e+07	25.3	0.1	1.21862
1,3,7-Trimethyluric acid_209.06809_3.336	Yes	297275	152904	3.20731e+06	19.01	16973.2	43279.5	46307.8	14.98	-4.03	21.5026	Guanine_152.0567_1.134	Yes	3.16523e+08	5.96484e+07	5.97964e+08	27.74	2.66527e+07	2.95074e+08	5.85472e+08	27.31	-0.43	1.23512
3,7-Dimethyluric acid_195.05247_2.228	Yes	1.13219e+07	1.64365e+07	93124.1	21.3	683295	6.31057e+06	6.75677e+06	21.55	0.25	1.07633	Arachidonic acid_305.24772_15.548	Yes	267924	1.9648e+06	206376	18.86	736941	1.44562e+06	3.63816e+06	20.58	1.72	4.2898
3-Methylxanthine_165.0419_1.401	Yes	4.22953e+06	4.17117e+06	16328.2	19.33	699649	998913	1.08234e+06	19.8	0.47	1.14852	Thymidine_243.0975_1.39	Yes	8.60839e+06	3.2033e+06	1.18448e+07	22.72	3.55572e+06	5.87116e+06	1.68958e+07	22.75	0.03	1.03279
Xanthine_151.02623_1.047	Yes	1.52311e+08	1.34006e+08	6.51481e+07	26.71	7.32583e+07	8.62108e+07	6.8267e+07	26.17	-0.54	4.14255	L-Valine_118.08616_0.913	Yes	1784074304	2068971098	1311767434	30.66	1106418169	3.92097e+08	1119079929	29.55	-1.11	9.18915
Hypoxanthine_135.03134_1.023	Yes	3.08534e+07	2.73751e+07	2.96973e+07	24.8	2.56901e+07	3.05035e+07	1.93733e+07	24.56	-0.24	3.46299	Thymine_127.05018_1.386	Yes	7.43334e+07	3.51738e+07	8.57709e+07	25.86	3.17056e+07	4.13359e+07	105098963	25.62	-0.24	1.35148
Picolinic acid_122.02482_1.028	Yes	5.65469e+06	3.00291e+06	5.01425e+06	22.07	4.71158e+06	5.61442e+06	6.61074e+06	22.41	0.34	3.01619	D-Proline_116.07053_0.961	Yes	4.82119e+08	2.30328e+08	5.7112e+08	28.57	2.76112e+08	356497831	3.92607e+08	28.33	-0.24	1.6422
DiHOME_313.23852_10.837	Yes	1.00664e+08	7.99997e+07	7.44752e+07	26.33	7.9153e+07	8.37429e+07	9.81533e+07	26.37	0.04	1.22013	Adenine_136.06177_0.952	Yes	1.06774e+07	63665036	5.84635e+07	25.02	2.97187e+07	2.73667e+07	8.96515e+07	25.32	0.3	1.27262
10-Hydroxydecanoic acid_187.13404_8.344	Yes	672578	760748	426425	19.2	1.01351e+06	1.16751e+06	605969	19.77	0.57	4.76002	L-Histidine_156.07675_1.039	Yes	1.2068e+08	1.43762e+08	1.09491e+08	26.88	1.85763e+07	8.24227e+07	7.47573e+07	25.53	-1.35	7.8549
Porphobilinogen_225.08822_1.639	Yes	1.96685e+07	1.33676e+07	1.2251e+07	23.82	1.62095e+07	2.0111e+07	1.59593e+07	24.05	0.23	2.60667	Leucine_132.10184_1.21	Yes	8906304043	8127043488	7428347007	32.92	3188685495	5511992655	5268097074	32.07	-0.85	30.4934
Imidazoleacetic acid_125.03572_1.266	Yes	1.17044e+07	8.71972e+06	2.75331e+06	22.64	6.16891e+06	5.75915e+06	1.63947e+06	21.89	-0.75	2.25722	Choline_104.10685_0.838	Yes	6.48577e+08	1002261248	7.12594e+08	29.53	5.0511e+08	1415722529	1419087475	29.9	0.37	1.93344
Deoxycholic acid_448.30722_10.567	Yes	4.66304e+08	8.05517e+08	8.59259e+08	29.35	1.13086e+09	1.06515e+09	1.09464e+09	30.03	0.68	13.5975	Uracil_113.03445_1.023	Yes	1.98588e+07	4.79249e+07	2.15564e+07	24.71	6.97764e+07	7.356e+07	6.42389e+07	26.04	1.33	32.2466
Glycocholic acid_464.30201_9.521	Yes	1.61144e+07	7.33483e+06	1.73383e+07	23.6	2.93776e+07	4.49907e+07	3.0196e+07	25.03	1.43	30.8157	β-Alanine_90.05483_1.029	Yes	190399096	1.69168e+08	2.02858e+08	27.48	5.4937e+07	1.00377e+08	1.15219e+08	26.36	-1.12	34.2372
Cholic acid_407.28019_10.439	Yes	2.8279e+08	3.79343e+08	3.6843e+08	28.34	3.13911e+08	3.49135e+08	2.33083e+08	28.13	-0.21	2.53156	L-Tyrosine_182.08113_1.091	Yes	6.8393e+08	671355995	5.62732e+08	29.25	1.63606e+08	1.07336e+08	7.88292e+07	26.73	-2.52	720.981
Lithocholic acid_375.29055_13.597	Yes	1.24569e+06	272132	1.5123e+06	19.61	4.18536e+06	3.69681e+06	5.76037e+06	22.09	2.48	27.0937	L-Phenylalanine_166.08611_1.55	Yes	9136966233	8107513716	7442845662	32.93	1763806709	4719440337	4551185963	31.65	-1.28	18.9584
7-ketodeoxycholic acid_405.26464_9.744	Yes	2.39097e+07	1.99305e+07	3.84078e+07	24.65	2.84996e+08	2.55036e+08	2.1339e+08	27.89	3.24	2192.98	L-Tryptophan_188.07047_2.704	Yes	1630956833	1017434724	1207425705	30.23	3.84168e+08	1275984678	1358769199	29.7	-0.53	2.24819
alpha-Ketoglutaric acid_145.01428_3.138	Yes	51208.7	33352	352671	16.37	1.42795e+06	888994	1.1869e+06	20.13	3.76	41.3702	L-Ornithine_133.09715_1.044	Yes	2.21435e+07	1.05923e+08	3.28685e+07	25.34	1.04298e+07	4.4905e+07	8.83312e+06	23.94	-1.4	4.25257
Butylparaben_193.08708_8.108		4.47591e+06	558586	76179.4	19.13	223821	694645	1.60678e+06	19.26	0.13	1.05466	L-Methionine_150.05833_1.039	Yes	3.68807e+08	2.99733e+08	2.85329e+08	28.24	8.2709e+07	3.95654e+08	2.8689e+08	27.65	-0.59	2.21912
Secobarbital_237.12458_7.958		892663	149345	806953	18.86	128391	163626	974655	18.06	-0.8	1.79689	L-Arginine_175.11891_1.024	Yes	1332081796	1.29356e+08	9.43039e+08	29.02	1.71551e+08	3.5848e+08	1231271657	28.66	-0.36	1.25448
(+/-)12(13)-DiHOME_313.23852_10.837		5.83103e+07	5.05524e+07	4.78326e+07	25.63	5.49836e+07	5.58241e+07	6.3671e+07	25.79	0.16	4.51926	L-Lysine_147.11283_1.005	Yes	2.68512e+08	2.28745e+08	1.48841e+08	27.64	6.17316e+07	2.08105e+08	2.28004e+08	27.09	-0.55	2.20927
(+/-)12(13)-DiHOME_313.23854_10.718		3.2144e+07	2.59606e+07	2.2533e+07	24.66	1.72537e+07	2.20257e+07	2.84009e+07	24.4	-0.26	2.81642	3-Indoleacrylic acid_188.07059_3.687	Yes	1633439321	1019267284	1209752355	30.23	1277578559	1360233212	1374698635	30.32	0.09	1.41901
(+/-)12(13)-DiHOME_313.23861_11.036		1.02098e+07	3.48672e+06	4.10957e+06	22.33	6.91562e+06	5.89307e+06	6.08145e+06	22.58	0.25	1.58661	Indole carbinol_148.07570_1.541	Yes	1.14096e+08	1.05501e+08	9.92621e+07	26.66	6.38034e+07	5.9911e+07	1.07834e+08	26.15	-0.51	7.34037
16-Hydroxyhexadecanoic acid_271.22798_12.759		4.86871e+06	1.12897e+06	2.41187e+06	21.17	1.08684e+06	2.17999e+06	3.11779e+06	20.89	-0.28	1.37288	Indole acryloylglycine_245.09193_3.237	Yes	3.92429e+06	7.73091e+06	1.02675e+06	21.59	4.76851e+06	1.99252e+06	1.92626e+06	21.33	-0.26	1.24615
4-Phenolsulfonic acid_172.99149_3.122		10256.9	7933.31	16628.5	13.43	2.67601e+06	13200.8	57757	16.95	3.52	4.96209	PEG n8_388.25433_5.836		7.09853e+08	551305042	3.03573e+08	28.87	251150866	2.84685e+08	3.00137e+08	28.05	-0.82	10.9987
(15Z)-9,12,13-Trihydroxy-15-octadecenoic acid_329.23341_9.384		1.0989e+07	1.08925e+08	1.03835e+07	24.47	1.2155e+08	1.07814e+08	1.36792e+07	25.75	1.28	2.24974	PEG n7_344.22808_5.481		4.96327e+08	4.12525e+08	1.95061e+08	28.35	1.51044e+08	1.67437e+08	1.87375e+08	27.32	-1.03	13.9134
(±)12(13)-DiHOME_313.23856_11.59		4.82518e+07	9.32489e+07	5.90537e+07	25.94	8.51418e+07	8.46945e+07	3.71903e+07	25.94	0	1.00692	δ-Valerolactam_100.07552_2.033		2.75575e+07	1.46942e+08	2.07182e+07	25.38	6.07652e+07	1.1477e+07	1.20672e+07	24.28	-1.1	2.4812
NP-011548_297.24359_13.303		1.35298e+07	2.4929e+07	5.63361e+06	23.56	1.36204e+07	1.50115e+07	3.75436e+06	23.13	-0.43	1.53349	δ-Valerolactam_100.07552_2.257		1.06163e+08	3.67025e+08	9.50204e+07	27.2	1.03466e+08	5.23228e+07	5.7638e+07	26.02	-1.18	6.1436
NP-020521_295.22793_12.963		4.32144e+06	2.91067e+07	3.79222e+06	22.9	2.8792e+07	3.12073e+07	3.45601e+06	23.8	0.9	1.7948	PEG n6_283.17522_4.9		3.78016e+08	3.10217e+08	1.87286e+08	28.06	1.56264e+08	1.63448e+08	1.82214e+08	27.31	-0.75	13.6953
1-[4-hydroxy-5-(hydroxymethyl)tetrahydrofuran-2-yl]pyrimidine-2,4(1H,3H)-dione_227.06751_1.164		2.1728e+07	6.73931e+06	1.47402e+07	23.62	9.12999e+06	2.64846e+07	1.11155e+07	23.73	0.11	1.1298	PEG n5_239.14892_3.036		5.14333e+08	4.15516e+08	2.81369e+08	28.55	2.28579e+08	2.27357e+08	2.83212e+08	27.87	-0.68	14.3232
NP-016455_241.11948_5.83		1.16341e+07	1.2875e+06	7.78255e+06	22.22	7.95802e+06	2.59511e+07	5.78504e+06	23.34	1.12	2.52648	Glycylproline_173.09206_0.924		5.2662e+08	2.3944e+08	3.40513e+08	28.38	1.63878e+08	8.94e+07	3.78898e+08	27.4	-0.98	4.42819
NP-011548_297.24357_13.647		9.57911e+06	3.02529e+07	7.27748e+06	23.61	3.32118e+07	5.03273e+07	9.08322e+06	24.56	0.95	2.59621	3-amino-4-(propylamino)cyclobut-3-ene-1,2-dione_155.08154_1.263		2.29563e+08	2.68152e+08	1.95478e+08	27.77	1.45856e+08	1.78482e+08	2.17325e+08	27.41	-0.36	6.1736
3-tert-Butyladipic acid_201.1133_8.152		1.46782e+07	1.26788e+07	1.17644e+07	23.63	1.33239e+07	1.20576e+07	1.31336e+07	23.61	-0.02	1.146	Valylproline_215.139_1.401		409423135	9.54707e+07	5.07912e+08	28.01	322333891	2.57075e+08	408937753	28.27	0.26	1.31805
Prolylglycine_171.07765_0.878		1.19011e+07	5.67792e+06	9.45546e+06	23.04	1.04745e+07	6.88556e+06	6.1265e+06	22.86	-0.18	1.48058	tert-Butyl N-[1-(aminocarbonyl)-3-methylbutyl]carbamate_231.17031_2.345		2.86888e+08	1.23297e+08	2.40128e+08	27.6	1.59617e+08	8.43752e+07	2.18794e+08	27.1	-0.5	2.46342
NP-016455_241.1195_5.508		7.66046e+06	2.10259e+06	5.57817e+06	22.09	5.67132e+06	1.48804e+07	3.55034e+06	22.67	0.58	1.91306	NP-011220_211.1441_6.223		2.06773e+08	1.92448e+08	1.62317e+08	27.47	1.58284e+08	9.71247e+07	1.77081e+08	27.06	-0.41	4.56231
NP-011548_297.24361_13.48		5.71058e+06	8.82613e+06	2.11499e+06	22.18	8.54251e+06	1.50566e+07	1.3752e+07	23.53	1.35	9.0652	N-{4-[(2R,3R)-3-(Hydroxymethyl)-4-methyl-5-oxo-2-morpholinyl]phenyl}acetamide_279.13408_1.802		377668109	6.6467e+07	2.24717e+08	27.41	3.11503e+08	2.3307e+08	1.74438e+08	27.8	0.39	1.55122
(15Z)-9,12,13-Trihydroxy-15-octadecenoic acid_329.2335_10.033		3.12033e+06	2.95043e+07	2.78954e+06	22.6	3.56723e+07	3.27177e+07	2.69091e+06	23.8	1.2	1.97616	10-HDA_187.13283_7.134		972495	950586	3.47572e+07	21.6	7.15057e+07	4.38927e+07	3.84922e+07	25.56	3.96	11.6209
Levulinic acid_115.04013_1.564		5.1392e+06	3.60458e+06	4.11e+06	22.02	5.23575e+06	1.29027e+07	3.99226e+06	22.62	0.6	3.15041	Glycylproline_173.09204_1.227		109154797	5.30019e+07	1.0023e+08	26.31	1.91832e+08	2.30227e+07	6.14526e+07	25.95	-0.36	1.39209
Glycoursodeoxycholic acid_448.30722_10.567		5.13278e+06	1.80342e+06	3.80616e+06	21.64	7.49175e+06	2.43044e+06	7.73854e+06	22.31	0.67	2.49662	Ethyl palmitoleate_283.26329_14.104		3.73108e+07	5.49013e+07	5.11364e+07	25.49	3.4571e+07	1.3678e+07	4.19806e+07	24.69	-0.8	4.89745
NP-018716_215.12893_8.886		3.34135e+06	6.79741e+06	2.24586e+06	21.82	6.94286e+06	6.48133e+06	2.29873e+06	22.16	0.34	1.53662	(2R,5R,6R)-3-[(1E,3E)-hepta-1,3-dien-1-yl]-5,6-dihydroxy-2-(hydroxymethyl)cyclohexan-1-one_255.15914_8.993		1.07635e+06	1.38688e+06	3.77902e+07	21.87	1.16624e+08	6.25954e+07	7.52116e+07	26.29	4.42	17.3046
N-Acetylornithine_173.09328_1.214		2.4787e+07	6.97003e+06	1.47009e+07	23.7	7.2268e+06	1.11843e+07	1.50142e+07	23.35	-0.35	1.68494	Leucylproline_229.15466_3.496		4.42176e+08	1.2133e+08	3.32007e+08	27.96	4.42266e+08	3.06511e+08	2.64008e+08	28.3	0.34	1.63916
Myristyl sulfate_293.17933_13.583		2.1009e+06	2.89805e+06	1.65736e+07	22.15	2.65422e+07	3.3816e+07	1.96216e+07	24.63	2.48	16.7328	2-Mercaptoethanol_79.0211_0.969		777495	505828	696974	19.31	678711	610956	689968	19.33	0.02	1.0863
NP-017664_491.21106_11.788		3.30269e+06	2.38626e+06	6.05671e+06	21.79	1.85162e+06	1.60644e+06	5.22572e+06	21.25	-0.54	2.16014	tert-Butyl N-[1-(aminocarbonyl)-3-methylbutyl]carbamate_231.17032_2.941		4.92091e+07	4.13349e+07	2.15764e+08	26.18	1.61553e+08	9.41972e+07	2.87817e+08	27.29	1.11	3.56188
(+/-)9-HpODE_311.22293_11.767		3.5385e+06	3.50496e+07	9.26944e+06	23.32	2.69272e+07	2.78105e+07	1.52544e+06	23.32	0	1.00136	(4S,5S,8S,10R)-4,5,8-trihydroxy-10-methyl-3,4,5,8,9,10-hexahydro-2H-oxecin-2-one_217.10703_6.702		7.34659e+07	8.80805e+07	6.31655e+07	26.15	5.80136e+07	4.86681e+07	6.25082e+07	25.74	-0.41	12.1324
(±)9-HpODE_311.22296_11.102		4.41779e+07	2.6317e+07	1.85453e+07	24.73	1.62723e+07	3.35253e+07	2.38678e+07	24.49	-0.24	1.57573	L-Alanyl-L-proline_187.10769_1.044		7.52955e+07	4.68574e+07	115600621	26.14	8.29978e+07	9.7022e+07	9.03005e+07	26.42	0.28	1.97314
13(S)-HOTrE_293.21232_13.557		744773	2.44288e+06	310966	19.66	7.2471e+06	1.16255e+07	1.02281e+06	22.07	2.41	6.4946	NP-011220_211.14412_6.032		7.9996e+07	7.5887e+07	6.20458e+07	26.11	6.28976e+07	7.09768e+07	6.9913e+07	26.02	-0.09	1.96936
Glycoursodeoxycholic acid_448.30719_10.784		2.71968e+06	825139	2.70428e+06	20.8	6.22789e+06	9.65968e+06	6.00898e+06	22.76	1.96	30.5614	Leucylproline_229.15464_2.694		2.61073e+08	8.19436e+07	2.11201e+08	27.3	2.57543e+08	2.50715e+08	2.16222e+08	27.84	0.54	2.81223
L-(-)-3-Phenyllactic acid_165.05579_6.339		1.52222e+07	4.97983e+06	7.57555e+06	22.99	9.66173e+06	2.08057e+07	2.90965e+07	24.1	1.11	5.92726	1-(2-Morpholinophenyl)dihydro-1H-pyrrole-2,5-dione_261.12345_5.647		5.97758e+07	6.08892e+07	4.95604e+07	25.75	5.76013e+07	6.18985e+07	5.2838e+07	25.77	0.02	1.15554
3,8,9-trihydroxy-10-propyl-3,4,5,8,9,10-hexahydro-2H-oxecin-2-one_243.12388_7.782		1.1098e+06	8.40889e+06	1.1277e+06	21.06	7.35362e+06	6.51146e+06	963978	21.77	0.71	1.59218	Docosahexaenoic acid methyl ester_343.26339_10.85		5.25326e+07	2.47144e+07	4.82498e+07	25.24	4.49185e+07	5.78009e+07	4.31034e+07	25.52	0.28	2.03609
(±)9-HpODE_311.22295_10.37		6.44177e+06	1.285e+07	4.62188e+06	22.79	9.10894e+06	9.31577e+06	6.19952e+06	22.94	0.15	1.31056	NP-013736_197.12847_4.671		7.67559e+07	7.35211e+07	6.76936e+07	26.11	8.83422e+07	7.81632e+07	7.22375e+07	26.24	0.13	3.73062
(±)9-HpODE_311.22296_11.373		2.51473e+07	1.96688e+07	5.09979e+06	23.7	2.92004e+07	2.05698e+07	4.15635e+06	23.69	-0.01	1.00333	Tolycaine_279.17043_6.456		2.05491e+06	2.78571e+06	7.30786e+06	21.73	3.59573e+07	7.94461e+06	1.92206e+07	24.07	2.34	20.4057
13(S)-HOTrE_293.21234_13.264		699379	1.32169e+06	459690	19.52	4.25179e+06	7.56721e+06	828560	21.51	1.99	7.58633	L-Alanyl-L-proline_187.10768_0.907		4.69628e+07	1.38135e+07	3.53834e+07	24.76	1.78309e+07	2.94227e+07	4.29861e+07	24.75	-0.01	1.00992
N-Acetyl-D-alloisoleucine_172.09802_6.11		8.34114e+06	3.96581e+06	6.49044e+06	22.51	6.05397e+06	4.65817e+06	5.41018e+06	22.35	-0.16	1.54285	N-(5-acetamidopentyl)acetamide_187.14411_2.142		6.0735e+07	6.20245e+06	2.4845e+07	24.33	7.2796e+06	5.90761e+06	8.94319e+06	22.79	-1.54	5.26829
9-Methyluric acid_181.03684_1.282		347058	983254	24993.3	17.64	63083.5	4.12284e+06	1.5175e+06	19.48	1.84	2.05677	NP-013663_353.23018_9.384		8.48997e+06	5.54649e+07	2.23411e+06	23.28	2.55103e+07	3.36015e+07	3.09418e+06	23.72	0.44	1.23509
Mevalonic acid_147.06637_1.441		1.03845e+07	3.74038e+06	8.18237e+06	22.7	8.97526e+06	8.94632e+06	8.39282e+06	23.06	0.36	2.15875	PPG n10_616.46344_13.22		2.53851e+07	2.42523e+07	35491.1	21.41	30043.2	36385.6	22246.7	14.82	-6.59	9.52227
Glycerophospho-N-palmitoyl ethanolamine_452.27863_13.288		77593.9	1.36263e+06	81120.3	17.64	4.46669e+06	6.34015e+06	406565	21.11	3.47	7.43882	Prolylleucine_229.15468_2.109		6.11489e+07	2.09853e+07	3.71961e+07	25.11	1.40351e+07	4.67004e+07	4.70917e+07	24.9	-0.21	1.2679
NP-018731_445.11439_9.041		3.19688e+06	3.59986e+06	574438	20.84	729707	394540	1.13079e+06	19.39	-1.45	4.83482	1-(2-Morpholinophenyl)dihydro-1H-pyrrole-2,5-dione_261.12344_5.878		2.96076e+07	3.18871e+07	1.99703e+07	24.67	2.51125e+07	4.58075e+07	2.46839e+07	24.86	0.19	1.62902
Alanyltyrosine_251.10386_2.737		483698	120611	2.36004e+06	18.98	1.0446e+06	1.9143e+06	5.94306e+06	21.12	2.14	4.73855	2-Amino-5-isopentyl-6-methylpyrimidin-4-ol_196.14439_1.353		2.86501e+07	286060	1.805e+07	22.33	291238	289905	3.51481e+07	20.45	-1.88	1.72344
2-Aminooctanedioic acid_188.09295_1.663		4.74332e+06	3.10109e+06	3.72311e+06	21.86	3.00376e+06	3.03156e+06	3.60688e+06	21.61	-0.25	3.56402	NP-016455_243.13393_1.802		2.04667e+07	6.06386e+07	1.49074e+07	24.66	36001474	1.91316e+07	1.52893e+07	24.39	-0.27	1.38073
Leucylproline_227.14025_3.566		1.60054e+07	3.79463e+06	1.1058e+07	23.06	1.70263e+07	1.22363e+07	8.64869e+06	23.54	0.48	1.90222	Tolycaine_279.17044_6.21		9.39983e+06	1.56909e+07	2.10287e+07	23.8	1.17646e+07	5.82646e+06	3.19909e+07	23.63	-0.17	1.18613
3,8,9-trihydroxy-10-propyl-3,4,5,8,9,10-hexahydro-2H-oxecin-2-one_243.12389_6.209		4.58368e+06	1.62895e+06	2.09627e+06	21.25	334211	31726.5	1.11819e+06	17.8	-3.45	10.729	NP-016455_243.13391_5.845		2.15405e+07	3.00155e+06	1.61011e+07	23.27	1.54704e+07	4.03022e+07	9.38088e+06	24.1	0.83	2.06222
NP-020521_295.22798_13.985		3.06039e+06	1.24401e+07	3.19343e+06	22.24	1.60988e+07	1.96788e+07	1.44348e+06	22.88	0.64	1.49568	Bis(methylbenzylidene)sorbitol_387.18055_10.668		1.81321e+07	2.95117e+07	2.34595e+07	24.47	3.8176e+07	1.79431e+07	1.22009e+07	24.27	-0.2	1.37379
N-Isovalerylglycine_158.08235_5.722		7.25554e+06	6.25859e+06	5.0679e+06	22.55	6.41793e+06	5.13737e+06	3.96769e+06	22.28	-0.27	2.94797	PD 0200347_212.13934_1.287		3.64446e+07	1.97199e+06	3.26297e+07	23.66	439658	478315	2.87305e+07	20.8	-2.86	3.31422
Valylproline_213.12458_1.528		7.46569e+06	1.90774e+06	1.03878e+07	22.33	9.68483e+06	6.96203e+06	7.50465e+06	22.93	0.6	2.07865	NP-016455_243.13398_2.359		1.5689e+07	5.49952e+07	9.61707e+06	24.27	1.65806e+07	1.73019e+07	2.16911e+07	24.13	-0.14	1.15723
5-(tert-butyl)-2-methyl-N-(5-methyl-3-isoxazolyl)-3-furamide_261.12459_5.589		6.98929e+06	2.75274e+06	5.41879e+06	22.17	1.11409e+07	5.12161e+06	5.22811e+06	22.67	0.5	2.46254	Hexadecanamide_256.26359_15.339		2.58601e+07	2.62537e+07	1.22273e+07	24.27	9.72816e+06	2.22953e+07	1.42976e+07	23.8	-0.47	2.50709
N-{[(2R,4S,5R)-5-(3-Cyclopentyl-1-methyl-1H-pyrazol-5-yl)-1-azabicyclo[2.2.2]oct-2-yl]methyl}-4-methoxybenzamide_421.25986_9.157		5.14251e+06	2.88845e+06	4.19293e+06	21.92	3.59752e+06	3.89443e+06	5.76214e+06	22.04	0.12	1.39297	PPG n6_367.26928_8.642		3.81192e+07	3.42264e+07	468540	23.02	98583	149873	251547	17.24	-5.78	18.8044
NP-011548_297.24361_14.523		8.48794e+06	1.51107e+07	4.13875e+06	22.95	1.09006e+07	8.61682e+06	7.82906e+06	23.11	0.16	1.26107	5-Hydroxylysine_204.13422_0.724		1.46954e+07	7.57064e+06	1.00112e+07	23.31	4.45674e+06	7.74722e+06	1.47229e+07	22.93	-0.38	1.83685
α-Aspartylphenylalanine_279.0988_1.492		3.46819e+06	669658	3.56307e+06	20.95	3.19916e+06	2.18428e+06	4.52835e+06	21.59	0.64	2.03332	2-(2-amino-3-methylbutanamido)-3-phenylpropanoic acid_265.15476_5.364		2.60357e+06	1.04252e+06	8.0716e+06	21.42	1.17488e+07	5.80909e+06	2.75348e+07	23.56	2.14	8.57199
Methylhippuric acid_192.06672_6.197		3.70609e+06	2.40548e+06	3.2798e+06	21.55	3.78704e+06	3.3979e+06	3.7146e+06	21.79	0.24	3.50648	2-Methylcyclohexan-1,3-dione_127.07532_6.598		477349	362060	1.46383e+07	20.38	2.041e+07	1.34524e+07	2.48897e+07	24.18	3.8	10.6542
Testosterone sulfate_367.15863_9		16938.9	805370	14387.7	15.83	3.93004e+06	17058.3	3.4399e+06	19.23	3.4	2.86686	(8aR,12S,12aR)-12-Hydroxy-4-methyl-4,5,6,7,8,8a,12,12a-octahydro-2H-3-benzoxecine-2,9(1H)-dione_253.14355_9.18		383828	872573	1.42421e+07	20.68	2.96905e+07	1.43395e+07	2.14246e+07	24.32	3.64	11.5541
4-[(2-{[2-(4-hydroxyphenyl)acetyl]amino}ethyl)amino]-4-oxobut-2-enoic acid_291.09882_2.871		2.2421e+06	589968	2.20557e+06	20.45	1.94009e+06	1.77231e+06	1.64236e+06	20.76	0.31	1.54633	α-Aspartylphenylalanine_281.1133_1.418		2.47906e+07	5.52216e+06	1.48495e+07	23.59	1.48666e+07	1.23566e+07	2.59816e+07	24.01	0.42	1.67898
NP-017664_491.21103_11.972		2.21733e+06	1.25023e+06	1.64578e+06	20.66	343835	1.47063e+06	2.25783e+06	20	-0.66	2.08478	α-Aspartylphenylalanine_281.11335_3.232		2.47095e+07	4.05445e+07	2.16625e+07	24.73	4.49188e+07	4.90339e+07	4.65058e+07	25.48	0.75	18.2352
Leucylproline_227.14021_2.813		6.89491e+06	2.51709e+06	6.91959e+06	22.23	9.58895e+06	6.10869e+06	6.90735e+06	22.82	0.59	3.06303	NP-016455_243.13388_5.516		1.40135e+07	3.45075e+06	8.9998e+06	22.85	7.26407e+06	2.10682e+07	5.71376e+06	23.19	0.34	1.41434
3,8,9-trihydroxy-10-propyl-3,4,5,8,9,10-hexahydro-2H-oxecin-2-one_243.12388_7.392		442681	2.8686e+06	421784	19.63	3.19214e+06	2.53791e+06	431776	20.53	0.9	1.91444	(1S,4aR,6aS,6bR,10R,11R,12aR)-1,10,11-trihydroxy-9,9-bis(hydroxymethyl)-2,2,6a,6b,12a-pentamethyl-1,2,3,4,4a,5,6,6a,6b,7,8,8a,9,10,11,12,12a,12b,13,14b-icosahydropicene-4a-carboxylic acid_521.34766_9.851		157987	103339	81653.4	16.75	59432.1	54629.3	41532.3	15.65	-1.1	38.3862
NP-016455_241.11953_5.154		3.85232e+06	5.00529e+06	3.22107e+06	21.92	4.37449e+06	4.81674e+06	3.30292e+06	21.97	0.05	1.19737	NP-001501_284.1395_6.675		1.40917e+07	1.32082e+07	1.23795e+07	23.65	1.07891e+07	1.24434e+07	1.15081e+07	23.46	-0.19	13.3481
3-[(methoxycarbonyl)amino]-2,2,3-trimethylbutanoic acid_184.09798_6.457		1.93681e+06	610933	3.44855e+06	20.61	1.49262e+06	364737	783138	19.52	-1.09	3.20218	3-[(4-hydroxyphenyl)methyl]-octahydropyrrolo[1,2-a]pyrazine-1,4-dione_261.12349_3.779		2.81874e+07	2.66112e+07	2.34836e+07	24.63	2.31089e+07	2.47984e+07	2.46878e+07	24.53	-0.1	3.57286
Corchorifatty acid F_327.21787_9.586		830900	2.76019e+06	1.06923e+06	20.36	3.35152e+06	7.73328e+06	859626	21.42	1.06	2.66795	1-(2-Morpholinophenyl)dihydro-1H-pyrrole-2,5-dione_261.12343_4.523		2.5368e+07	1.8549e+07	1.94915e+07	24.32	2.06343e+07	1.69899e+07	2.27088e+07	24.25	-0.07	1.36296
NP-020521_295.22795_12.642		1.67361e+06	1.7718e+06	1.37208e+06	20.61	1.88673e+06	2.31009e+06	428742	20.23	-0.38	1.52888	Tetraglyme_240.18057_6.039		9.90744e+06	1.9042e+07	419581	22.03	1.29474e+07	9.89167e+06	1.31678e+06	22.4	0.37	1.15734
4-Indolecarbaldehyde_144.04555_6.98		2.14947e+06	1.36053e+06	1.86246e+06	20.75	2.1307e+06	3.21703e+06	1.37321e+06	21.01	0.26	1.81488	PPG n7_425.31119_9.36		9.27262e+06	7.4945e+06	289054	21.37	136015	100296	151311	16.96	-4.41	18.7028
3-Chlorobenzoic acid_154.99057_8.933		959558	596102	169866	18.81	289137	145838	383273	17.95	-0.86	2.71197	Sedanolide_195.13793_9.369		4.62206e+06	26320065	2.9501e+06	22.76	2.0363e+07	2.0516e+07	3.05273e+06	23.37	0.61	1.4927
N-(4-Cyanobenzyl)-2-[(1S,4S,5S)-5-isopropyl-4-{[(isopropylcarbamoyl)amino]methyl}-2-methyl-2-cyclohexen-1-yl]acetamide_423.27552_9.307		3.65267e+06	3.07724e+06	3.43485e+06	21.69	3.17511e+06	4.99896e+06	4.90467e+06	22.03	0.34	4.77361	(8aR,12S,12aR)-12-Hydroxy-4-methyl-4,5,6,7,8,8a,12,12a-octahydro-2H-3-benzoxecine-2,9(1H)-dione_253.14351_8.832		102487	1.01509e+06	1.05056e+07	19.97	1.73199e+07	1.07379e+07	1.29198e+07	23.68	3.71	7.75747
N-Isovalerylglycine_158.08235_5.405		4.37173e+06	1.94747e+06	2.13256e+06	21.33	2.65317e+06	2.04238e+06	2.20177e+06	21.12	-0.21	1.59172	2-Amino-4-methylpyrimidine_110.07116_0.749		7.46744e+06	9.91065e+06	6.04476e+06	22.87	1.97056e+06	1.46766e+06	5.27016e+06	21.24	-1.63	19.1248
NP-003535_503.33826_10.344		19370.9	18411.5	26657.3	14.37	19872.2	23226.2	24444.5	14.45	0.08	1.45623	4-(4-hydroxy-2,6,6-trimethyl-3-{[(2R,3R,4S,5S,6R)-3,4,5-trihydroxy-6-(hydroxymethyl)oxan-2-yl]oxy}cyclohex-1-en-1-yl)butan-2-one_389.21733_8.245		497546	396235	1.24324e+07	20.36	1.28093e+07	9.30925e+06	1.19151e+07	23.42	3.06	7.66859
N-[3-(tert-butyl)phenyl]thiomorpholine-4-carbothioamide_293.11451_3.442		2.79017e+06	4.97579e+06	1.95948e+06	21.52	4.29546e+06	3.12874e+06	3.08194e+06	21.72	0.2	1.52257	13(S)-HOTrE_295.22684_11.761		1.14733e+07	5.12849e+07	9.73285e+06	24.09	1.78137e+07	4.24879e+07	5.17315e+06	23.91	-0.18	1.13259
Deoxycholic Acid_437.29118_10.29		332250	842877	98555.2	18.21	364093	401312	378831	18.54	0.33	1.37342	DL-Leucineamide_131.11785_0.915		1.71784e+07	6.41787e+06	1.65257e+07	23.54	1.73374e+07	4.06999e+07	1.53306e+07	24.4	0.86	3.95459
N-Acetyl-D-alloisoleucine_172.09802_5.864		2.30786e+06	1.41128e+06	1.20724e+06	20.59	980730	848850	1.01721e+06	19.85	-0.74	15.3391	Ecgonine_186.11243_6.472		6.80054e+06	2.97212e+06	1.19545e+07	22.57	4.91515e+06	1.84363e+06	1.62116e+06	21.22	-1.35	6.41486
13,14-dihydro Prostaglandin F1α_357.26479_10.356		24047.2	1.72306e+06	45100.4	16.91	1.3924e+06	1.50066e+06	55801.5	18.9	1.99	2.13944	PEG n8_371.22781_6.842		1.83382e+07	1.1082e+07	1.26276e+07	23.71	1.48687e+07	2.1439e+07	4.82427e+06	23.46	-0.25	1.35738
NP-011548_297.24359_14.701		3.89188e+06	7.4045e+06	1.8041e+06	21.83	1.08917e+07	6.48652e+06	3.09304e+06	22.52	0.69	2.3172	Sedanolide_195.13786_11.865		7.00157e+06	1.86609e+07	7.02601e+06	23.21	2.03457e+07	2.00022e+07	6.1439e+06	23.69	0.48	1.81575
Capryloylglycine_200.12935_7.86		1.66912e+06	1.13883e+06	2.09092e+06	20.6	2.22584e+06	1.55327e+06	2.22964e+06	20.91	0.31	2.77054	NP-007909_225.14853_10.156		931766	1.47285e+06	5.23989e+06	20.88	3.71269e+06	2.54619e+06	8.81802e+06	22.06	1.18	3.74329
Dihydroroseoside_387.20264_8.843		192289	2.04295e+06	661338	19.28	111209	174419	442298	17.64	-1.64	4.43239	PEG n8_371.22717_7.102		2.97747e+06	9.20979e+06	2.01166e+06	21.86	6.77882e+06	2.82596e+06	3.04303e+06	21.89	0.03	1.02647
N-Isovalerylglycine_158.08237_1.69		9.64625e+06	2.63183e+06	2.52104e+06	21.93	5.69374e+06	4.31953e+06	5.26726e+06	22.27	0.34	1.5936	13(S)-HOTrE_295.22693_15.051		9.25307e+06	1.15582e+07	5.30635e+06	22.98	4.76263e+06	1.52779e+07	7.80735e+06	22.98	0	1.00062
ethyl 2-{4-[(2-cyanoethyl)(methyl)amino]benzylidene}hydrazine-1-carboxylate_273.13451_6.681		111354	337806	2.06857e+06	18.7	1.5594e+06	1.77696e+06	570056	20.15	1.45	2.95324	2-Methylcyclohexan-1,3-dione_127.07532_4.851		1.23321e+06	1.93494e+06	3.10827e+06	20.9	9.10904e+06	6.26029e+06	5.70363e+06	22.71	1.81	70.7914
3-tert-Butyladipic acid_201.11331_6.967		1.00288e+06	1.20656e+06	770645	19.9	2.27205e+06	2.05641e+06	828864	20.58	0.68	4.12797	2,3,4,9-Tetrahydro-1H-β-carboline-3-carboxylic acid_217.09712_4.839		7.79146e+06	9.72865e+06	5.14112e+06	22.8	152814	4.94747e+06	5.5057e+06	20.62	-2.18	3.66063
Corchorifatty acid F_327.21786_10.881		3.25996e+06	3.69883e+06	2.0699e+06	21.48	5.1124e+06	5.56849e+06	235152	20.85	-0.63	1.4304	(8aR,12S,12aR)-12-Hydroxy-4-methyl-4,5,6,7,8,8a,12,12a-octahydro-2H-3-benzoxecine-2,9(1H)-dione_253.14343_9.526		78780.9	52576.9	1.00355e+07	18.4	1.51569e+07	5.63853e+06	1.2105e+07	23.27	4.87	8.31283
2,6-Dimethyl-5-(4-methylphenoxy)pyrimidin-4-ol_229.09832_5.195		777665	1.65413e+06	309382	19.49	337248	288014	652019	18.6	-0.89	3.08401	ethyl 1-methylpyrrolo[1,2-a]pyrazine-7-carboxylate_205.09707_4.476		1.39044e+07	1.12681e+07	1.38585e+07	23.63	9.68586e+06	1.74382e+07	1.47305e+07	23.69	0.06	1.21775
Corchorifatty acid F_327.21786_8.978		4.1331e+06	3.53906e+06	3.28624e+06	21.79	4.7297e+06	4.19106e+06	3.80062e+06	22.01	0.22	5.52957	NP-016724_265.10475_10.361		2.89769e+06	2.72364e+06	103877	19.84	196329	175861	98498.3	17.2	-2.64	5.6212
(R)-3-Hydroxy myristic acid_243.19662_13.263		615967	135871	355694	18.24	199947	17774.2	1.47556e+06	17.41	-0.83	1.44805	GLK_317.21848_1.346		3.04105e+06	761352	5.86276e+06	21.19	886023	3.88553e+06	8.3424e+06	21.55	0.36	1.26063
Corchorifatty acid F_327.21788_9.899		1.17788e+06	2.61581e+07	1.07399e+06	21.61	1.66617e+07	3.80658e+07	1.21571e+06	23.13	1.52	1.93682	1-(1-azepanylmethyl)-1,3-dihydro-3-spiro(1,3-dioxolan-2-yl)-2H-indol-2-one_303.17049_9.572		6.66221e+06	1.59657e+07	1.51894e+06	22.38	1.33663e+06	2.44918e+06	1.11485e+07	21.66	-0.72	1.60521
(±)9-HpODE_311.22294_9.897		1.98676e+06	1.4054e+06	2.23713e+06	20.81	3.38438e+06	3.95224e+06	1.60115e+06	21.41	0.6	3.87253	Leucylproline_229.15458_5.021		1.22499e+07	7.04313e+06	9.8651e+06	23.18	1.05893e+07	8.21805e+06	1.24954e+07	23.29	0.11	1.41515
NP-016455_241.11948_6.131		1.744e+06	975071	1.37971e+06	20.34	1.59062e+06	2.23185e+06	1.31395e+06	20.67	0.33	2.67302	Norgestrel_313.21638_10.425		2.60405e+06	4.65562e+06	5.6459e+06	21.96	5.53227e+06	6.28038e+06	5.57231e+06	22.46	0.5	4.62637
NP-020515_255.12393_7.073		104350	36870.9	1.19543e+06	17.34	3.01269e+06	1.71113e+06	1.881e+06	21.02	3.68	14.04	Leucylproline_229.15457_4.531		2.12618e+07	9.49728e+06	1.52986e+07	23.8	2.41628e+07	1.3374e+07	1.04619e+07	23.84	0.04	1.07062
4-(hydroxymethyl)benzoic acid_151.04013_5.806		465468	352727	1.10044e+06	19.11	1.75387e+06	899099	693545	19.97	0.86	4.09262	Penbutolol_292.2272_8.689		1.17186e+06	4.42971e+06	660505	20.52	3.58381e+06	3.91272e+06	474306	20.84	0.32	1.22504
N-Acetyl-D-alloisoleucine_172.09802_5.433		1.39203e+06	501824	847054	19.68	864727	639648	514054	19.33	-0.35	1.99467	Linoleoyl ethanolamide_324.28991_14.252		979236	2.61622e+06	781313	20.27	5.02714e+06	1.6741e+06	1.74702e+06	21.22	0.95	3.73571
N-(4-Cyanobenzyl)-2-[(1S,4S,5S)-5-isopropyl-4-{[(isopropylcarbamoyl)amino]methyl}-2-methyl-2-cyclohexen-1-yl]acetamide_423.27555_9.066		1.04098e+06	868968	949762	19.86	729122	682708	1.23955e+06	19.7	-0.16	1.65758	PEG Monooleate n5_525.37659_16.63		233211	702950	269673	18.43	213574	815521	318436	18.54	0.11	1.12003
N-(4-Cyanobenzyl)-2-[(1S,4S,5S)-5-isopropyl-4-{[(isopropylcarbamoyl)amino]methyl}-2-methyl-2-cyclohexen-1-yl]acetamide_423.27552_8.466		1.35808e+06	1.17263e+06	1.0896e+06	20.2	1.15517e+06	1.27457e+06	1.70792e+06	20.38	0.18	2.44735	Cinnamic acid_149.05974_1.539		2.02934e+08	1.83844e+08	1.74473e+08	27.48	9.12469e+07	9.14504e+07	1.83984e+08	26.78	-0.7	8.88044
Neotame_377.21002_10.91		40340.9	2.3897e+06	31115	17.14	2.67669e+06	2.79794e+06	37074.7	19.32	2.18	2.02394	Piperidine_86.09627_1.211		2227549551	6150551938	5664655642	31.99	5997733817	4336510135	6114233342	32.34	0.35	1.90291
α-Aspartylphenylalanine_279.09878_3.299		1.52865e+06	1.90671e+06	1.16921e+06	20.52	2.50423e+06	2.65502e+06	2.09993e+06	21.2	0.68	24.4349	Isoprene_86.09628_1.235		2227549551	6150551938	5664655642	31.99	5997733817	2688082735	6114233342	32.11	0.12	1.16295
Leucylproline_227.14022_2.218		1.82572e+06	594087	1.26097e+06	20.08	721347	1.67113e+06	1.56042e+06	20.24	0.16	1.22632	Benzene_120.08068_1.541		4333678796	3912370376	3822016260	31.9	2194869825	2143200960	4087686510	31.32	-0.58	7.54512
NP-003141_415.1037_5.538		998529	6418.49	6855.86	15.11	11508.3	9031.45	6864.42	13.13	-1.98	2.1784	Isoprene_69.06991_1.161		8.83615e+07	7.40972e+07	6.63368e+07	26.17	8.15561e+07	6.29383e+07	8.05491e+07	26.15	-0.02	1.11522
2,6-dimethoxy-N-(1-methyl-1H-pyrazol-5-yl)benzamide_260.10417_4.832		673241	1.09021e+06	526422	19.47	1.56518e+06	990501	753882	20.01	0.54	3.46347	3b-Hydroxy-5-cholenoic acid_357.27883_11.781		2252112256	1484507755	2248149876	30.87	3482094555	3846896551	1794049718	31.43	0.56	4.27433
15-OxoEDE_321.24355_13.993		12191.5	725920	647854	17.45	349856	94602.5	296474	17.71	0.26	1.10531	(−)-nabilone_373.27379_10.433		2908780401	2403707009	2634888623	31.3	2654258630	2985865259	2566128286	31.35	0.05	1.49333
2-Furyl(5-hydroxy-1-benzofuran-3-yl)methanone_227.03507_7.786		1.03172e+06	117925	6997.57	16.53	10886.4	8413.87	14444.5	13.42	-3.11	4.70952	Bis(2-ethylhexyl) phthalate_391.28461_10.422		3.06132e+08	2.0181e+08	2.70108e+08	27.93	2.7568e+08	2.9386e+08	266907901	28.05	0.12	1.87727
N-{[(2R,4S,5R)-5-(3-Cyclopentyl-1-methyl-1H-pyrazol-5-yl)-1-azabicyclo[2.2.2]oct-2-yl]methyl}-4-methoxybenzamide_421.2599_8.95		832381	730804	754100	19.56	663282	685879	1.05596e+06	19.58	0.02	1.08035	[Similar to: PEG n13; ΔMass: -44.0260 Da]_564.35906_6.683		1233515722	1149065219	9.288e+08	30.03	8.69038e+08	9.2353e+08	8.35133e+08	29.7	-0.33	14.9216
Capryloylglycine_200.12931_7.714		365878	351613	399227	18.5	418830	308879	348643	18.44	-0.06	1.47985	Tenacibactin C_520.33287_6.519		1340877411	1105221379	9.39593e+08	30.06	8.81934e+08	9.65182e+08	883063639	29.76	-0.3	7.85558
NP-020271_343.17634_8.193		10491	81487	853731	16.46	1.0381e+06	670859	849017	19.68	3.22	6.43571	Tyramine_120.08069_1.543		4333678796	3912370376	3822016260	31.9	2194869825	2143200960	4087686510	31.32	-0.58	7.54512
Leucylproline_227.14022_5.46		1.34264e+06	1.02876e+06	820058	19.99	1.46999e+06	734683	614181	19.73	-0.26	1.70553	[Similar to: PEG n11; ΔMass: -44.0261 Da]_476.30661_6.328		1286779970	1097708264	7.57125e+08	29.93	6.96145e+08	7.42933e+08	7.20914e+08	29.42	-0.51	11.0273
10-HDA_185.11835_8.342		297231	806030	471708	18.88	1.93284e+06	887432	208545	19.44	0.56	1.61605	[Similar to: PEG n14; ΔMass: -44.0259 Da]_608.38556_6.839		9.14375e+08	883238398	7.15759e+08	29.63	704399745	7.50938e+08	7.06785e+08	29.42	-0.21	7.09789
Linoleic Acid_279.23303_15.828		110138	708186	170954	17.86	636343	876109	314717	19.09	1.23	4.01134	[Similar to: PEG n15; ΔMass: -44.0259 Da]_318.19615_6.967		1168801445	1049381611	8.32613e+08	29.91	7.93322e+08	9.51904e+08	9.31166e+08	29.73	-0.18	2.92698
N-{[(2R,4S,5R)-5-(3-Cyclopentyl-1-methyl-1H-pyrazol-5-yl)-1-azabicyclo[2.2.2]oct-2-yl]methyl}-4-methoxybenzamide_421.25998_8.572		656522	684446	618915	19.32	329983	194981	768692	18.49	-0.83	4.46168	[Similar to: PEG n16; ΔMass: -44.0260 Da]_340.20924_7.091		1154838181	1039444289	8.62325e+08	29.91	7.98334e+08	9.33368e+08	9.54775e+08	29.73	-0.18	3.46376
Oleic Acid_281.24867_16.651		163785	392023	248151	17.94	386803	544928	462918	18.81	0.87	11.1698	[Similar to: PEG n10; ΔMass: -44.0261 Da]_432.28037_6.105		9.98877e+08	8.55054e+08	5.37528e+08	29.52	4.57076e+08	4.75571e+08	4.88149e+08	28.82	-0.7	16.82
GLYCERYL DIACETATE 2-LINOLEATE_437.29083_11.825		5.2676e+08	2.84588e+08	5.1536e+08	28.67	6.84059e+08	8.06723e+08	7.0254e+08	29.44	0.77	16.3792	[Similar to: (2R,3R,4R,5R,6S)-2-{[(2R,3S,4S,5R,6R)-6-(benzyloxy)-3,4,5-trihydroxyoxan-2-yl]methoxy}-6-methyloxane-3,4,5-triol; ΔMass: 306.2622 Da]_362.2225_7.206		9.13884e+08	817788849	6.78325e+08	29.57	616186628	7.1796e+08	7.63758e+08	29.38	-0.19	3.59436
Bis(2-ethylhexyl) phthalate_389.26988_11.076		764003	5.70168e+07	1.74582e+06	22.01	1.07498e+06	2.76769e+06	3.18523e+06	21.01	-1	1.56794	Bis(2-ethylhexyl) phthalate_391.28452_11.07		4.4659e+07	890633005	4.31944e+07	26.84	1.62965e+07	9.58486e+07	4.5922e+07	25.31	-1.53	2.49502
Sarcoehrendin I_451.27043_9.795		1.80594e+07	8.15226e+07	1.2964e+07	24.67	1.72871e+07	1.14063e+07	1.80027e+07	23.86	-0.81	2.55365	3b-Hydroxy-5-cholenoic acid_375.28963_11.968		1.32119e+08	6.37167e+07	7.93136e+07	26.38	1.00158e+08	8.64956e+07	9.44579e+07	26.48	0.1	1.29284
shrimp shell_220.08276_0.836		3.50654e+07	1.06185e+07	1.88447e+07	24.19	6.89479e+06	5.14774e+06	1.41757e+07	22.92	-1.27	7.84498	Bufa-20,22-dienolide_355.26339_10.425		1488848800	1229397283	1333992326	30.33	1394610126	1547330125	1309786394	30.4	0.07	1.83619
Propionic acid_73.02953_1.22		1.15681e+08	1.04191e+08	5.50368e+07	26.38	1.34998e+08	5.88039e+07	4.30873e+07	26.06	-0.32	1.61086	N,N-Dimethylacetamide_88.07555_1.407		1.84472e+07	1.73622e+07	1.81875e+08	25.21	5.97473e+08	543499395	1.99176e+08	28.58	3.37	19.5133
Chenodeoxycholic acid 3-sulfate_471.24241_10.127		66263.1	8.09681e+07	24582	18.96	1.31107e+07	26909.9	2.74665e+06	19.92	0.96	1.18561	cholic acid_426.32175_10.424		1956642294	1659603830	1517888165	30.66	1823188227	1852129698	1544799431	30.69	0.03	1.1751
Propionic acid_73.02954_0.953		1.5194e+07	3.0977e+07	2.78396e+07	24.49	2.71017e+07	5.4786e+06	4.86799e+06	23.1	-1.39	5.53431	3,6,9,12-Tetraoxadocosan-1-ol_335.27944_13.234		446082184	4.27439e+08	792765	25.67	231582	815558	657944	18.93	-6.74	10.5903
12-HSA_299.25918_14.117		1.33298e+07	2.27287e+07	2.25076e+07	24.18	1.70343e+07	4.68166e+06	2.92651e+07	23.66	-0.52	1.7679	N-(3-hydroxy-decanoyl)-homoserine lactone_272.1857_9.279		371658	320872	3.07194e+08	21.66	5.92433e+08	2.67752e+08	4.70055e+08	28.65	6.99	9.94827
Acetic acid_59.01387_0.861		1.40192e+07	6.44535e+06	9.89028e+06	23.2	6.759e+06	6.88947e+06	8.66168e+06	22.82	-0.38	3.04543	3b-Hydroxy-5-cholenoic acid_375.28956_11.003		4.78304e+07	2.20008e+07	1.34587e+07	24.53	2.38807e+07	1.08727e+07	3.46459e+07	24.31	-0.22	1.28444
Dehydroglycine_132.03029_0.783		1.36706e+07	8.27376e+06	2.96139e+07	23.83	1.27603e+07	3.59647e+07	3.20913e+07	24.55	0.72	2.66515	3,6,9,12,15-Pentaoxapentacosan-1-ol_396.33216_13.236		4.0663e+08	3.97248e+08	585144	25.44	261846	507365	357112	18.47	-6.97	10.9384
Acetophenone_119.05026_6.41		674873	101316	254941	17.98	321471	966515	1.48393e+06	19.56	1.58	4.9983	3-Methylsulfolene_150.05835_1.041		3.68807e+08	2.99733e+08	2.85329e+08	28.24	3.95654e+08	2.8689e+08	2.81054e+08	28.24	0	1.02137
1,2-Dichlorobenzene_144.96178_9.315		1.24172e+07	1.10769e+07	6.46475e+06	23.2	7.62135e+06	3.0622e+06	1.03331e+07	22.57	-0.63	2.8092	Trimethylamine_60.08085_0.858		5.06296e+07	3.15902e+08	2.21965e+07	26.08	4.97572e+07	5.09455e+06	2.06932e+07	24.05	-2.03	4.10838
(Ac)2-L-Lys-D-Ala_300.15662_2.342		8.27452e+07	6.23445e+07	3.37139e+07	25.73	2.92737e+07	2.12974e+07	3.76173e+07	24.77	-0.96	10.1009	Acetylcadaverine_145.13358_1.001		4.1985e+08	3.95735e+07	5.63275e+07	26.54	5.34668e+07	3.20773e+07	7.27322e+07	25.57	-0.97	2.30401
2,4-Dichlorobenzoic acid_188.95165_9.314		1.0838e+07	9.31665e+06	6.00728e+06	23.01	6.62111e+06	2.65257e+06	8.73049e+06	22.35	-0.66	3.15596	Bis(2-ethylhexyl) phthalate_391.28452_11.22		1.08083e+08	3.55406e+08	4.70422e+07	26.86	3.60578e+07	9.58486e+07	7.05936e+07	25.9	-0.96	2.73853
Sucralose_441.01312_5.83		7973.73	203130	2.03207e+06	17.18	2.07559e+07	1.31301e+06	250194	20.85	3.67	3.51883	Pyrrolidine_72.08076_0.904		8.1265e+08	2.18985e+07	1026122903	27.97	403089253	5.24489e+08	7.15744e+06	26.77	-1.2	1.47188
9,10-Dihydroxystearic acid_315.25415_12.366		8.07338e+06	1.12483e+07	7.87658e+06	23.09	1.02888e+07	7.10966e+06	8.94342e+06	23.05	-0.04	1.16367	7alpha-Hydroxy-3-oxochol-4-en-24-oic acid_389.26892_9.748		4.43501e+07	2.23827e+08	3.11055e+07	26.01	2.5427e+07	2.26001e+07	3.69137e+07	24.72	-1.29	4.41521
2-Deoxypentose_133.05072_0.936		1.23675e+07	1.02048e+07	9.58069e+06	23.34	1.38912e+07	1.25256e+07	1.34551e+07	23.66	0.32	17.8158	(Ac)2-L-Lys-D-Ala_302.17121_2.213		8.23138e+08	573715259	3.31379e+08	29.01	1.85425e+08	165313036	3.28516e+08	27.69	-1.32	18.4057
Bis(2-ethylhexyl) phthalate_389.26991_11.991		2.41201e+06	9.15452e+06	1.35534e+06	21.57	1.5051e+06	1.23429e+07	1.98602e+06	21.67	0.1	1.06396	Cadaverine_103.12287_0.847		3.26055e+07	1.88718e+06	2.11303e+07	23.38	1.39111e+07	425147	1.72026e+07	22.15	-1.23	1.66792
Ethyl acetate_133.05071_1.031		1.23675e+07	1.69335e+07	9.58069e+06	23.59	1.98558e+07	1.15594e+07	2.77109e+07	24.14	0.55	3.65384	EJ4025000_159.14922_1.134		323755222	4.15227e+07	1.6855e+07	25.86	1.51209e+07	4.60972e+06	4.80773e+07	23.84	-2.02	3.66468
7-ketodeoxycholic acid_405.2648_9.193		67729.8	405011	169943	17.35	221303	33575.5	649890	17.37	0.02	1.00881	gaboxadol_141.06585_0.888		1.80321e+07	3.57159e+07	9.0199e+06	24.1	4.70488e+06	6.11404e+06	1.26264e+07	22.77	-1.33	7.39033
[Similar to: AB-FUBINACA metabolite 2B; ΔMass: -201.1089 Da]_196.02289_0.914		1.04701e+07	1.14355e+07	8.44334e+06	23.26	9.70974e+06	8.75245e+06	1.11099e+07	23.23	-0.03	1.17544	7-ketodeoxycholic acid_407.27948_9.789		1.05848e+08	1.62094e+08	6.63575e+07	26.64	7.04613e+07	4.73483e+07	5.66651e+07	25.77	-0.87	9.8632
5,4'-dihydroxy-3,3'-dimethoxy-6,7-methylenedioxyflavone_357.06173_9.162		2.148e+06	1.51751e+06	9.64727e+06	21.59	3.49418e+06	2.66103e+06	1.12153e+07	22.17	0.58	1.64496	2,5-Bis(tert-butylperoxy)-2,5-dimethylhexane_291.25315_13.219		1.94222e+08	1.98837e+08	1.2127e+06	25.1	980063	1.45531e+06	1.37395e+06	20.26	-4.84	8.38132
(Hydroxyethyl)methacrylate_129.05579_4.066		1.12438e+07	2.34847e+06	1.39894e+07	22.77	6.05915e+06	4.17748e+07	8.03906e+06	23.6	0.83	1.89469	Artemotil_295.19049_10.65		115569	124476	164542898	20.35	318216502	2.38191e+08	1.51993e+08	27.75	7.4	9.90089
[Similar to: (9R,10R)-10-hydroxy-8,8-dimethyl-9-{[(2S,3R,4S,5S,6R)-3,4,5-trihydroxy-6-(hydroxymethyl)oxan-2-yl]oxy}-2H,8H,9H,10H-pyrano[2,3-h]chromen-2-one; ΔMass: -90.0354 Da]_333.09424_1.067		799674	43901.8	2.79459e+06	18.82	885877	1.16735e+07	5.53773e+06	21.88	3.06	4.61301	3a,7a-Dihydroxycholanoic acid_375.28967_11.958		1.32119e+08	6.37167e+07	7.93136e+07	26.38	1.04553e+08	9.14284e+07	9.44579e+07	26.53	0.15	1.49061
trimethadione_142.05108_1.017		3.36507e+07	6.20428e+06	3.08788e+07	24.15	8.44834e+06	8.83409e+06	3.77351e+07	23.75	-0.4	1.37515	3b-Hydroxy-5-cholenoic acid_375.28943_10.583		5.06229e+06	2.04638e+07	618235	21.93	2.39818e+06	213289	2.94549e+06	20.13	-1.8	2.51491
Sinapyl alcohol_209.08196_6.494		1.68056e+07	148085	106099	19.29	147658	627428	1.68721e+06	19.04	-0.25	1.07922	4-Hydroxyprolylleucine_245.14963_1.333		3.16127e+08	2.53762e+08	1.33019e+08	27.71	3.56141e+08	2.94984e+08	9.97925e+07	27.71	0	1.00942
2-carboxy-2,5-dihydro-5-oxo-2-furanacetic acid_185.00922_2.138		12079.7	9902.5	8182.43	13.28	14729.2	13218.8	9756.81	13.6	0.32	3.90796	Phenol_136.07569_1.056		1.09943e+08	1.15249e+08	8.77533e+07	26.63	1.47652e+08	1.44898e+08	1.08652e+08	26.98	0.35	7.5861
Acetone_161.082_2.566		350743	170427	1.82073e+07	19.97	1.93865e+07	7.85215e+06	7.19071e+06	23.3	3.33	5.10483	Embelin_295.1905_10.663		107939	124476	164542898	20.31	318216502	2.38191e+08	1.51993e+08	27.75	7.44	9.89247
Embelin_293.17599_10.787		1.08905e+07	1.08753e+07	9.43133e+06	23.31	1.6728e+07	1.15347e+07	1.12024e+07	23.62	0.31	5.40482	PEG-4_195.12271_1.734		2.9479e+08	2.23315e+08	2.06407e+08	27.83	1.30379e+08	1.43628e+08	197466853	27.2	-0.63	17.0126
N-acetyl-L-2-aminoadipic acid_202.07269_1.038		2.25981e+07	1.35729e+06	2.0804e+07	23.04	7.88987e+06	1.37994e+06	2.55235e+07	22.64	-0.4	1.19629	Acetylcarnitine_245.14962_1.328		3.16127e+08	2.53762e+08	1.33019e+08	27.71	3.56141e+08	2.94984e+08	9.97925e+07	27.71	0	1.00942
Succinic anhydride_99.0088_1.124		1.81638e+07	2.25545e+07	4.38753e+06	23.54	3.28924e+07	8.41791e+06	7.20695e+06	23.59	0.05	1.0385	L-gamma-Glutamyl-L-leucine_243.13397_2.171		2.13773e+07	1.17513e+08	2.21131e+07	25.19	1.39281e+07	6.97441e+07	4.73252e+07	25.09	-0.1	1.0679
L-(-)-methionine_148.04389_1.051		1.6643e+07	1.07944e+07	9.72424e+06	23.52	1.00053e+07	1.17874e+07	1.36981e+07	23.48	-0.04	1.1157	Brasilicardin C aglycone_424.30615_9.753		2.53652e+07	1.38966e+08	1.68653e+07	25.22	1.54646e+07	1.23773e+07	2.04904e+07	23.91	-1.31	4.11641
(Hydroxyethyl)methacrylate_129.05578_3.312		7.41483e+06	2.96601e+06	8.29132e+06	22.44	4.70482e+06	2.58461e+07	4.52845e+06	22.97	0.53	1.64854	Bufa-20,22-dienolide_355.26348_11.069		1.4824e+08	2.94243e+08	1.3267e+08	27.42	1.20319e+08	1.07068e+08	1.21567e+08	26.79	-0.63	6.27384
DL-Citrulline_174.08849_0.791		6.77974e+06	6.46124e+06	9.06968e+06	22.81	1.60319e+07	1.75165e+06	2.19661e+06	21.91	-0.9	2.31499	[Similar to: (2R,3R,4R,5R,6S)-2-{[(2R,3S,4S,5R,6R)-6-(benzyloxy)-3,4,5-trihydroxyoxan-2-yl]methoxy}-6-methyloxane-3,4,5-triol; ΔMass: 482.3674 Da]_450.27508_7.583		144263626	1.37018e+08	1.12508e+08	26.96	9.02e+07	120437887	1.21277e+08	26.71	-0.25	4.33774
2-(3-Hydroxy-3,4,5,6-tetrahydro-1H-cyclopenta[c]furan-4-yl)-3-methoxy-3-oxopropanoic acid_301.09303_5.389		103213	22200.8	9.02921e+06	18.07	7.70496e+06	7.23757e+06	9.28181e+06	22.94	4.87	7.4313	Coumarone_119.04905_1.053		1.31442e+07	1.17893e+07	1.15857e+07	23.53	1.00759e+07	9.27182e+06	1.36253e+07	23.37	-0.16	2.46534
2-(3-Hydroxy-3,4,5,6-tetrahydro-1H-cyclopenta[c]furan-4-yl)-3-methoxy-3-oxopropanoic acid_301.09302_5.614		57950.5	54740.3	1.2788e+07	18.39	1.03799e+07	1.01339e+07	1.41627e+07	23.45	5.06	7.98454	Cassaidine_408.31122_10.436		3.33545e+07	2.86002e+07	2.54539e+07	24.79	3.95585e+07	3.86693e+07	3.40111e+07	25.15	0.36	20.1005
meprobamate_217.11947_1.661		1.37328e+07	3.54425e+06	1.20622e+07	23	5.93175e+06	7.11489e+06	1.02114e+07	22.85	-0.15	1.19942	3a,7a-Dihydroxycholanoic acid_785.59296_11.785		1.72227e+08	9.34614e+07	1.96066e+08	27.13	1.67672e+08	2.02618e+08	1.29285e+08	27.29	0.16	1.43526
N2-Dimethylguanosine_310.11458_0.912		5.75319e+06	824469	3.31732e+06	21.26	1.19702e+06	1.09219e+06	1.62766e+06	20.29	-0.97	3.10646	3-Vinylaniline_120.08071_2.125		2.57623e+08	2.40419e+08	208073253	27.8	6.31587e+07	1.57069e+08	241341317	27	-0.8	4.28178
5-Hexyl-2-oxotetrahydro-3-furancarboxylic acid_213.11331_7.802		1.27e+06	588955	1.63994e+07	21.14	1.75982e+07	9.23717e+06	1.1392e+07	23.55	2.41	5.63212	Methyl vinyl ketone_88.07556_1.415		1.84472e+07	1.73622e+07	1.81875e+08	25.21	5.97473e+08	543499395	1.99176e+08	28.58	3.37	19.5133
D-Sucrose_387.11468_0.811		7.18313e+06	70605	1.01352e+07	20.72	6.56025e+06	8.02897e+06	9.40981e+06	22.92	2.2	2.52312	MFCD00036904_496.34013_13.298		1.51891e+06	1.67671e+07	1.6313e+06	21.72	3.63324e+07	1.34476e+08	1.86342e+06	24.32	2.6	3.39219
3-Carboxyindole_206.04592_4.686		2.03689e+06	8.45597e+06	3.73674e+06	21.93	105391	1.15883e+07	1.95672e+07	21.46	-0.47	1.16771	Valylvaline_217.15464_1.403		1.41891e+08	6.4711e+07	1.47988e+08	26.72	1.11621e+08	6.10887e+07	1.44556e+08	26.57	-0.15	1.27028
cyclic diguanylic acid_344.04038_1.021		1.1572e+06	1.12945e+06	2.75483e+06	20.55	1.09047e+07	2.97516e+06	4.32492e+06	22.31	1.76	15.2767	3-(2,4-Cyclopentadien-1-ylidene)-5alpha-androstan-17beta-ol_339.26847_11.783		1.20113e+08	7.87006e+07	1.21371e+08	26.64	1.94982e+08	2.18739e+08	1.01918e+08	27.28	0.64	5.41823
(+)-geniposide_387.1299_6.118		12897.8	12320.5	1.00435e+07	16.83	1.32074e+07	9.92939e+06	1.25952e+07	23.49	6.66	9.3416	Acetanilide_136.07568_1.072		1.09943e+08	1.15249e+08	8.77533e+07	26.63	1.95126e+07	1.44898e+08	1.08652e+08	26.01	-0.62	1.87123
2,6-Dideoxy-3-O-methyl-L-arabino-hexopyranose_161.08199_2.501		462532	18068.2	1.82073e+07	19.03	1.93865e+07	7.85215e+06	1.01162e+07	23.46	4.43	4.95248	mebutamate_233.14959_1.106		1.30859e+08	3.10637e+07	9.16831e+07	26.1	7.47997e+07	5.41208e+07	9.06841e+07	26.09	-0.01	1.0083
L-(+)-Cysteine_120.01252_0.759		5.12976e+06	153422	6.03936e+06	20.68	6.01595e+06	6.24986e+06	7.04815e+06	22.61	1.93	3.06545	N-methylethanolamine phosphate_156.04218_0.816		1.01643e+08	1.19799e+08	1.07397e+08	26.7	5.24753e+07	6.64217e+07	1.2735e+08	26.18	-0.52	3.9628
ACPC_100.0404_0.833		5.85853e+06	1.81177e+06	3.79314e+06	21.71	2.28315e+06	2.0676e+06	4.03781e+06	21.35	-0.36	1.76075	Triethylene glycol_173.07843_1.281		4.10487e+07	4.04783e+07	4.45218e+07	25.32	1.34122e+07	1.60244e+07	2.81728e+07	24.12	-1.2	47.8629
Leu-Val_229.15585_2.466		1.44802e+07	5.62056e+06	1.18161e+07	23.23	9.85855e+06	4.70266e+06	1.11449e+07	22.94	-0.29	1.59463	meprobamate_219.13394_1.588		1.53597e+08	4.10974e+07	1.38467e+08	26.51	6.19677e+07	5.69768e+07	1.30755e+08	26.2	-0.31	1.44579
MFCD00070502_163.06134_0.899		9.08433e+06	1.69853e+06	8.50194e+06	22.28	2.53039e+06	2.47781e+06	5.7494e+06	21.66	-0.62	1.91584	dimethylformamide_74.06002_1.012		4.76922e+07	1.52204e+07	2.39771e+07	24.63	3.46497e+07	31935446	4.13855e+07	25.09	0.46	2.51589
Oxadixyl_277.11951_1.881		1.84673e+07	3.19827e+06	1.00412e+07	23	1.16097e+07	1.40281e+07	9.65618e+06	23.47	0.47	1.75616	(−)-nabilone_373.27396_11.032		3.47467e+08	8.58455e+08	3.16547e+08	28.76	2.95681e+08	1.30132e+08	2.81186e+08	27.72	-1.04	6.39407
Thioacetamide_120.01252_0.774		5.12976e+06	153422	6.03936e+06	20.68	6.01595e+06	6.24986e+06	7.04815e+06	22.61	1.93	3.06545	4-{(Z)-[(5E,8Z,11Z,14Z)-1-Hydroxy-5,8,11,14-icosatetraen-1-ylidene]amino}butanoic acid_390.30064_9.543		302808	3.77512e+06	191335	19.2	348412	97443.1	129792	17.32	-1.88	3.77865
4-Hydroxyprolylleucine_243.13514_1.401		1.1723e+07	1.01393e+07	5.37575e+06	23.04	1.72943e+07	1.32991e+07	4.41682e+06	23.26	0.22	1.30811	(3R,5S,7R,8R,9S,10S,12S,13R,14S,17R)-10,13-Dimethyl-17-[(2R)-5,6,7-trihydroxy-2-heptanyl]hexadecahydro-1H-cyclopenta[a]phenanthrene-3,7,12-triol_455.33709_14.991		2.31105e+07	1.2899e+07	1.10507e+07	23.83	1.73271e+07	2.68523e+07	2.11209e+07	24.35	0.52	4.33642
Panosialin wD_399.22128_9.866		44244.6	1.53485e+07	194849	18.96	288235	32240.6	564879	17.41	-1.55	1.63461	MFCD00025555_203.1389_1.259		1.63655e+08	7.90505e+07	9.79671e+07	26.69	1.13414e+08	7.22433e+07	1.37826e+08	26.63	-0.06	1.11068
Kojic acid_141.01941_2.134		204699	117816	18729.8	16.23	373661	172118	156197	17.72	1.49	3.96165	2-Methylthiazolidine_104.05273_1.039		8.12556e+07	6.39582e+07	5.83676e+07	26	7.41595e+07	5.20479e+07	5.96846e+07	25.87	-0.13	1.80077
Diprogulic Acid_273.0981_5.939		79546.5	182823	774756	17.77	1.90632e+06	1.10206e+06	1.34371e+06	20.43	2.66	18.3325	Leu-Leu_245.186_5.652		5.70865e+07	7.6653e+07	5.63992e+07	25.9	1.28981e+08	2.62706e+07	1.23235e+08	26.16	0.26	1.31835
L-gamma-Glutamyl-L-leucine_259.13006_2.324		6.70515e+06	2.00089e+07	3.72435e+06	22.92	6.67938e+06	8.85837e+06	5.10679e+06	22.68	-0.24	1.31193	leu-gly-leu_302.20758_6.452		2.81637e+07	312015	9.24015e+07	23.15	229851	1.58546e+07	1.0603e+08	22.8	-0.35	1.07976
2,6-Dideoxy-3-O-methyl-L-arabino-hexopyranose_161.08201_2.76		934633	437515	1.60393e+07	20.84	7.38586e+06	5.37113e+06	6.8707e+06	22.63	1.79	3.10536	N~2~-Acetyl-L-ornithine_175.10784_1.071		2.48962e+08	1.15483e+08	1.49528e+08	27.28	1.59197e+08	3.62913e+07	1.65149e+08	26.55	-0.73	2.43045
Pyruvic acid_175.02493_1.231		7.6501e+06	3.34566e+06	1.35077e+07	22.74	1.53249e+06	5.42625e+06	7.54861e+06	21.92	-0.82	2.38367	Glulisine A_226.15505_1.111		9.01362e+07	1.13348e+08	9.22445e+07	26.55	9.83844e+07	1.10471e+08	105106891	26.64	0.09	2.13365
Pyrene_201.07108_9.54		9.66631e+06	6.36204e+07	7.34563e+06	23.98	1.26796e+07	1.16692e+07	8.45368e+06	23.36	-0.62	1.75919	[Similar to: NP-022470; ΔMass: 292.1737 Da]_316.18057_6.905		1.09891e+08	9.36601e+07	8.11707e+07	26.49	1.64163e+08	8.80358e+07	9.6962e+07	26.74	0.25	2.16145
Diethylpyrocarbonate_161.04565_0.123		3.28403e+07	2.49986e+07	9.30479e+06	24.23	1.27881e+08	5.21645e+07	3.12157e+07	25.82	1.59	8.21092	4-Hydroxy-5-methyl-3(2H)-thiophenone_148.04273_1.04		3.10662e+07	7.18771e+07	2.72522e+06	24.12	4.9388e+07	7.69669e+06	2.79044e+07	24.39	0.27	1.14
tenivastatin_435.27551_11.076		7.64905e+06	1.71363e+08	5.82179e+06	24.23	3.17014e+06	8.63822e+06	1.31743e+07	22.76	-1.47	2.31731	Glycocholic acid_466.31664_9.508		3.94152e+07	1.33491e+07	4.15019e+07	24.74	5.49537e+07	8.20384e+07	5.20176e+07	25.88	1.14	8.56032
L-gamma-Glutamyl-L-leucine_259.13008_1.264		8.72625e+06	8.20168e+06	5.17286e+06	22.78	1.00659e+07	5.64774e+06	7.35918e+06	22.83	0.05	1.14862	Bis(2-ethylhexyl) phthalate_391.28462_9.116		2.91749e+06	2.44243e+06	2.32699e+06	21.28	2.78701e+06	1.61066e+06	3.42613e+06	21.25	-0.03	1.08659
13(S)-HpOTrE_309.20727_12.392		2.53955e+06	1.15353e+07	417728	21.14	1.19229e+07	1.01279e+07	2.06818e+06	22.59	1.45	2.40195	Adenine_136.06174_1.132		1.7902e+07	2.37931e+07	2.66149e+07	24.42	2.79366e+07	92624035	1.61184e+07	25.05	0.63	2.18212
2-Deoxypentose_133.05072_1.152		1.23675e+07	6.72875e+06	7.62122e+06	23.03	1.25098e+07	1.15594e+07	1.42558e+07	23.6	0.57	8.71361	(−)-nabilone_373.27398_11.931		7.84649e+07	1.40754e+08	1.13444e+08	26.68	1.32029e+07	1.11867e+08	3.64518e+07	25.17	-1.51	5.66069
9,10-Dihydroxystearic acid_315.25419_12.116		1.49547e+06	4.05507e+06	1.26442e+06	20.91	3.77002e+06	2.69666e+06	1.27687e+06	21.16	0.25	1.35963	Leu-Leu_245.186_5.073		101908806	7.38386e+07	7.71976e+07	26.31	9.96395e+07	3.93905e+07	8.33316e+07	26.04	-0.27	1.78554
(+)-geniposide_387.12989_5.92		14039.4	12749.8	6.62581e+06	16.69	6.03633e+06	6.0725e+06	6.68556e+06	22.58	5.89	8.34014	(5R,6Z,8E,10E,12S,14Z)-5,12,20,20,20-Pentahydroxy-6,8,10,14-icosatetraenoic acid_402.24889_9.201		62117	61522.8	6.68505e+07	19.28	1.20681e+08	7.61226e+07	9.04996e+07	26.49	7.21	10.1254
2-[(2Z)-2-({4-[(3-Aminopropyl)amino]butyl}imino)-2-hydroxyethyl]-2-hydroxysuccinic acid_318.16726_1.604		5.86445e+06	773628	5.91773e+06	21.51	1.25257e+06	2.65777e+06	7.99325e+06	21.51	0	1.00258	MFCD00025555_203.13892_1.716		1.16992e+08	4.98538e+07	1.20954e+08	26.41	4.21463e+07	6.57931e+07	145127428	26.14	-0.27	1.41424
Hexitol_181.07187_0.784		255408	210796	227647	17.81	2.92635e+06	646802	435252	19.84	2.03	13.5216	Cyclo-(Ile-Ser)_201.12336_1.137		5.68181e+06	3.72458e+07	1.8947e+07	23.92	9.11293e+06	7.48933e+06	2.36844e+07	23.48	-0.44	1.49742
DL-Glutamine_145.06193_0.822		1.10353e+07	6.93615e+06	6.78257e+06	22.94	1.01966e+07	7.1367e+06	7.04704e+06	22.93	-0.01	1.01562	mebutamate_233.14961_1.777		9.75049e+07	4.01734e+07	9.80913e+07	26.12	1.02427e+08	7.00597e+07	1.04806e+08	26.44	0.32	1.89515
[Similar to: 2-[(1-naphthylmethyl)thio]-N'-(2,2,2-trifluoroacetyl)acetohydrazide; ΔMass: 65.1045 Da]_406.16226_1.619		2.57824e+06	1.09553e+06	3.21171e+06	20.99	3.53125e+06	6.82323e+06	2.38211e+06	21.88	0.89	4.11617	LQ1825000_145.13356_1.034		4.1985e+08	3.95735e+07	5.63275e+07	26.54	5.34668e+07	3.20773e+07	7.27322e+07	25.57	-0.97	2.30401
1,4-Cyclohexanediisocyanate_225.0882_1.519		7.64606e+06	6.02894e+06	3.84056e+06	22.42	3.85568e+06	8.87045e+06	6.89339e+06	22.56	0.14	1.28294	meprobamate_219.13393_1.834		7.12055e+07	2.14164e+07	7.33805e+07	25.52	7.50663e+07	7.89133e+07	1.26845e+08	26.44	0.92	4.51586
Toluene_91.05532_7.281		5.58947e+06	1.6592e+06	1.16033e+06	21.07	1.79178e+06	676898	1.08868e+06	20.07	-1	3.64471	(4-Ethoxyphenyl)urea_181.09714_1.083		641748	421136	1.39459e+06	19.46	1.46032e+06	878405	773838	19.93	0.47	2.1471
4-hydroxymethyl-2-methyl-3-furanylcarbonyl α-L-rhamnopyranoside_301.09305_5.61		64037.1	54740.3	1.2788e+07	18.44	1.03799e+07	1.01339e+07	1.41627e+07	23.45	5.01	7.97372	3-Tropanol_159.14919_1.288		1.35506e+08	1.67294e+07	8.27761e+06	24.66	1.51209e+07	4.40454e+06	1.55038e+07	23.27	-1.39	2.77496
Diethyl carbonate_117.05576_2.594		1.80786e+07	7.73989e+06	5.79329e+06	23.15	6.37356e+06	9.38259e+06	1.82399e+06	22.19	-0.96	3.0478	5-Methylcytosine_158.09241_1.039		5.21137e+07	5.29082e+07	6.85563e+07	25.77	4.07486e+07	3.86881e+07	6.45773e+07	25.48	-0.29	3.04333
Lepistamide C_319.16646_7.996		1.48453e+06	498106	6.97372e+06	20.72	1.12972e+06	197766	292717	18.62	-2.1	5.1947	Piperidine_86.09634_0.845		5.23797e+07	6.04313e+06	5.3049e+07	24.61	3.02053e+07	6.43522e+06	2.79964e+07	24.07	-0.54	1.44611
1-Stearoyl-2-hydroxy-sn-glycero-3-PE_540.33112_13.314		42375.2	895679	40381.7	16.81	8.97557e+06	5.71883e+06	193272	21.04	4.23	7.19135	Artemotil_313.2012_9.111		62343.4	105117	4.50682e+07	19.35	7.9067e+07	5.09183e+07	4.92772e+07	25.8	6.45	9.77278
Leu-Leu_243.17151_5.636		3.67345e+06	7.16477e+06	3.60242e+06	22.12	8.56992e+06	1.94821e+06	7.53111e+06	22.26	0.14	1.15416	1,3-Dipropylxanthine_254.16115_1.212		8.34695e+07	7.70051e+06	6.42029e+07	25.04	9.75039e+06	6.05906e+07	2.64572e+07	24.58	-0.46	1.34585
Tetrahydrofuran_117.05574_2.752		1.80786e+07	5.39838e+06	1.31307e+07	23.37	6.37356e+06	9.38259e+06	1.04658e+07	23.03	-0.34	1.73971	1-(beta-D-Ribofuranosyl)-1,2-dihydropyrimidine_247.12888_1.088		9.85061e+07	5.32239e+07	5.75741e+07	26	8.8866e+07	6.78051e+07	8.72001e+07	26.27	0.27	2.30932
AMPA_185.05688_0.899		7.49033e+06	4.85309e+06	3.37334e+06	22.24	4.43821e+06	5.42161e+06	4.87109e+06	22.22	-0.02	1.04983	Bufa-20,22-dienolide_355.26349_11.221		2.26117e+08	2.30728e+08	2.2891e+08	27.77	1.43192e+08	1.70248e+08	1.84384e+08	27.3	-0.47	82.3384
L-gamma-Glutamyl-L-valine_245.11442_1.223		1.3401e+07	9.4804e+06	9.60531e+06	23.35	1.29079e+07	1.125e+07	1.32437e+07	23.57	0.22	3.46319	(Ac)2-L-Lys-D-Ala_302.17126_1.357		6.29836e+06	1.19944e+07	8.46418e+06	23.04	5.97497e+07	4.64092e+07	1.04627e+07	24.87	1.83	10.9523
6-Methylhept-5-en-2-one_125.09725_7.346		1.20642e+06	6.19882e+06	1.30832e+06	21.03	6.68554e+06	5.43171e+06	1.77543e+06	21.94	0.91	2.47925	L-gamma-Glutamyl-L-leucine_261.14451_1.173		8.07887e+07	7.31081e+07	4.65313e+07	25.95	1.01348e+08	4.36371e+07	6.13996e+07	25.95	0	1.0102
Thiocyanic acid_57.97575_0.955		5.60622e+06	5.44628e+06	1.00734e+06	21.58	2.12371e+06	1.68498e+06	5.7335e+06	21.38	-0.2	1.17308	Oxazole_70.02876_0.748		535761	494777	479091	18.94	372962	455744	799202	18.97	0.03	1.07861
Valylvaline_215.14021_1.474		7.61298e+06	3.22706e+06	6.54049e+06	22.37	8.91649e+06	4.03685e+06	6.32178e+06	22.54	0.17	1.32088	Deanol_131.11789_0.911		1.71784e+07	6.41787e+06	1.65257e+07	23.54	1.73374e+07	4.06999e+07	1.53306e+07	24.4	0.86	3.95459
Leu-Val_229.15583_3.038		8.35159e+06	2.97782e+06	1.25528e+07	22.69	1.08879e+07	6.57461e+06	1.59611e+07	23.32	0.63	2.29758	Vazabitide A_272.16061_1.569		2.2751e+08	9.96862e+07	3.71602e+07	26.49	1.28371e+08	7.31045e+07	1.116e+08	26.6	0.11	1.10905
Vitamin C_175.02492_1.235		7.6501e+06	3.34566e+06	1.35077e+07	22.74	1.53249e+06	5.42625e+06	7.54861e+06	21.92	-0.82	2.38367	ET8750000_70.06516_0.933		1.71029e+08	1.26674e+08	1.33966e+08	27.09	7.10911e+07	1.79391e+08	6.19295e+06	25.35	-1.74	3.3412
Valproic acid_125.09724_7.333		1.20642e+06	6.19882e+06	1.30832e+06	21.03	6.68554e+06	5.43171e+06	1.77543e+06	21.94	0.91	2.47925	Methohexital_263.13911_5.566		1.87614e+08	6.01976e+07	1.32139e+08	26.77	2.30754e+08	1.1869e+08	1.21761e+08	27.15	0.38	1.85242
Tetrahydrofuran_117.05576_2.557		1.80786e+07	7.73989e+06	5.12477e+06	23.09	9.14267e+06	9.38259e+06	4.67129e+06	22.81	-0.28	1.47237	(3R,5S,7R,8R,9S,10S,12S,13R,14S,17R)-10,13-Dimethyl-17-[(2R)-5,6,7-trihydroxy-2-heptanyl]hexadecahydro-1H-cyclopenta[a]phenanthrene-3,7,12-triol_477.31907_15.233		1.08195e+07	1.54285e+07	4.09953e+07	24.18	3.81152e+06	1.95056e+07	9.11597e+06	23.07	-1.11	3.5723
Oxagrelate_275.1039_6.238		6.69377e+06	858955	4.70136e+06	21.52	4.28768e+06	7.46792e+06	3.72938e+06	22.23	0.71	2.0006	Eglumetad_186.07606_1.025		4.89962e+07	8.5683e+06	5.03703e+07	24.72	2.25912e+07	1.45423e+07	5.20404e+07	24.62	-0.1	1.0826
2-Acetylcyclohexanone_139.07646_6.41		180588	99744.4	98182.9	16.88	608120	44802.7	226118	17.48	0.6	1.60077	RG1300000_299.25822_14.574		1.68655e+07	1.97408e+07	1.27443e+07	23.95	11726500	2.38715e+07	1.59913e+07	23.97	0.02	1.0584
Maleic acid_115.00375_0.931		1.22624e+06	746337	4.4851e+06	20.61	1.52908e+06	4.01201e+06	2.47541e+06	21.24	0.63	1.96291	Paraldehyde_133.08591_6.99		2.05593e+08	8.40982e+07	1.99897e+08	27.17	2.05367e+08	1.86346e+08	4.02879e+07	26.78	-0.39	1.47318
Malondialdehyde_71.01388_0.863		1.19223e+07	4.45023e+06	8.61485e+06	22.88	1.35686e+07	7.06281e+06	8.3768e+06	23.15	0.27	1.61338	3-(2,4-Cyclopentadien-1-ylidene)-5alpha-androstan-17beta-ol_339.26844_11.973		9.7583e+07	4.89422e+07	5.83386e+07	25.96	8.57732e+07	7.56154e+07	7.83105e+07	26.25	0.29	2.52903
4-Amino-5-hydroxypyrimidin-2(1H)-one_108.0204_1.058		5.73854e+06	123128	2.24282e+06	20.15	108710	69144.1	40188.9	16.03	-4.12	13.3933	CI-4_254.16121_1.169		8.34695e+07	7.70051e+06	6.42029e+07	25.04	9.75039e+06	6.05906e+07	2.64572e+07	24.58	-0.46	1.34585
[Similar to: α-Aspartylphenylalanine; ΔMass: -47.0394 Da]_232.05924_1.641		8.59407e+06	8.61499e+06	5.30322e+06	22.8	1.19218e+07	1.30654e+07	9.08621e+06	23.42	0.62	10.7312	(E)-Furazolidone_226.04519_1.023		4.10305e+07	1.74233e+07	3.52619e+07	24.81	6.19663e+06	4.53569e+06	4.05243e+07	23.32	-1.49	4.31345
[Similar to: Microcystin LY; ΔMass: -814.4652 Da]_186.03849_0.83		4.10704e+06	867328	3.96239e+06	21.2	4.56246e+06	4.81389e+06	3.42697e+06	22.01	0.81	2.88729	Val-Ser_205.11819_0.924		2.59157e+07	5.60093e+06	1.93861e+07	23.75	283547	1.12425e+07	2.63736e+07	22.06	-1.69	2.1277
meprobamate_217.11948_1.927		7.14943e+06	2.44135e+06	5.84947e+06	22.16	7.34829e+06	7.89762e+06	1.27873e+07	23.11	0.95	6.62809	Trans-Non-2-en-(4.6.8)-triyn-1-ol_131.0491_1.544		1.14096e+08	1.05501e+08	9.92621e+07	26.66	6.38034e+07	5.9911e+07	1.07834e+08	26.15	-0.51	7.34037
Imiprothrin_317.15079_7.907		587367	5.44546e+06	721108	20.33	1.30964e+06	975834	1.8828e+06	20.35	0.02	1.0146	Cyclo-(Ile-Ser)_201.1234_2.082		7.70872e+06	1.07429e+07	1.1665e+07	23.24	1.24873e+07	1.49623e+07	1.41973e+07	23.72	0.48	14.1685
butyrin_301.16581_6.773		5.34768e+06	4.09217e+06	2.80963e+06	21.91	20794.9	20752.7	25172.7	14.43	-7.48	83333.3	L-gamma-Glutamyl-L-valine_247.1289_2.14		111386322	1.787e+08	6.25099e+07	26.68	6.24461e+07	1.6506e+08	1.2367e+08	26.69	0.01	1.01465
1-Deoxy-1-(4-morpholinyl)-alpha-D-fructofuranose_248.11409_1.302		4.92271e+06	1.02564e+06	431253	20.31	506225	236744	2.75179e+06	19.4	-0.91	1.75594	Vazabitide B_290.17118_1.607		2.46805e+07	8.09075e+06	4.64746e+06	23.22	6.84134e+06	7.44743e+06	3.00991e+07	23.46	0.24	1.2204
Leu-Leu_243.1715_5.076		5.96094e+06	4.30531e+06	4.34947e+06	22.2	6.75687e+06	2.90296e+06	4.82367e+06	22.12	-0.08	1.18064	2-[(2Z)-2-({4-[(3-Aminopropyl)amino]butyl}imino)-2-hydroxyethyl]-2-hydroxysuccinic acid_320.18184_1.501		2.81574e+07	3.18044e+06	3.66989e+07	23.83	6.20042e+06	1.18332e+07	4.0734e+07	23.78	-0.05	1.02559
3-Hydroxysebacic acid_217.10821_6.78		1.43877e+06	5.71819e+06	1.00842e+06	20.95	5.96212e+06	4.34671e+06	1.0751e+06	21.53	0.58	1.62019	DL-Citrulline_176.10289_0.878		3.66194e+07	3.0495e+07	2.53598e+07	24.86	5.0506e+07	619128	1.41903e+07	22.86	-2	2.85185
Sarcoehrendin I_451.27051_10.133		2.82519e+06	5.61663e+06	2.3614e+06	21.67	2.1665e+06	2.30588e+06	3.08706e+06	21.25	-0.42	2.78664	Leucylasparagine_246.14485_1.701		9.67902e+07	1.46466e+06	6.11941e+07	24.29	5.07593e+07	4.98491e+07	9.08159e+07	25.87	1.58	2.16781
mebutamate_231.13514_1.194		9.98949e+06	2.62918e+06	6.68094e+06	22.42	2.22316e+06	4.65309e+06	6.7124e+06	21.97	-0.45	1.7285	Butabarbital_213.12341_1.079		4.64871e+07	8.36363e+06	8.10922e+07	24.91	9.12714e+07	8.25105e+07	69779480	26.27	1.36	4.08839
Furcatin_427.16128_7.908		7961.43	7294.77	4.73008e+06	15.99	4.12398e+06	4.30336e+06	5.3905e+06	22.12	6.13	8.44316	sphinganine_302.30558_12.962		4.82911e+06	7.03335e+07	1.27941e+06	22.85	228454	1.11496e+07	1.0051e+07	21.49	-1.36	1.62304
MFCD00025555_201.12459_1.814		9.38758e+06	3.66995e+06	7.70326e+06	22.62	3.55495e+06	5.84013e+06	1.06866e+07	22.53	-0.09	1.11639	Gly-DL-Phe_223.10774_2.889		7.33645e+07	1.20153e+07	2.85574e+07	24.8	4.82949e+07	6.42509e+07	8.11178e+07	25.91	1.11	4.33281
mebutamate_231.13515_1.871		7.22307e+06	3.04735e+06	6.34606e+06	22.31	6.64151e+06	5.00226e+06	6.80716e+06	22.54	0.23	1.65354	3,4-Dihydroxy-12,13-epoxytrichothec-9-en-15-yl acetate_325.16481_11.124		86921.8	155040	2.38234e+07	19.39	5.63348e+07	3.51538e+07	3.95476e+07	25.35	5.96	12.2221
1,4,5,6-tetrahydro-6-oxonicotinic acid_140.03542_1.021		4.27806e+06	208434	2.32544e+06	20.28	182082	619439	4.21834e+06	19.57	-0.71	1.37965	Xanthine_153.04071_1.041		2.89668e+07	4.25518e+07	1.53293e+07	24.67	3.56534e+07	2.82777e+07	2.00422e+07	24.7	0.03	1.05163
1-(beta-D-Ribofuranosyl)-1,2-dihydropyrimidine_213.08822_1.742		7.66195e+06	6.42795e+06	6.46748e+06	22.7	5.79864e+06	7.53413e+06	6.42824e+06	22.64	-0.06	1.46463	gamma-glutamyltyramine_267.13404_1.421		4.26168e+07	7.04047e+06	3.01401e+07	24.31	2.26334e+07	2.23148e+07	4.36955e+07	24.74	0.43	1.55479
Pivagabine_186.11364_6.098		1.70015e+06	2.82791e+06	1.02276e+06	20.7	2.81896e+06	2.52583e+06	953139	20.85	0.15	1.21338	N6_N6_N6-Trimethyl-L-lysine_173.16476_1.536		4.84268e+07	1.59764e+06	1.40941e+07	23.3	1.0966e+06	297571	1.93019e+06	19.71	-3.59	10.5437
Desthiobiotin_213.12458_2.085		754983	458911	755734	19.29	351145	463197	478784	18.7	-0.59	9.58414	leu-gln_260.16049_1.072		2.38144e+07	6.39333e+06	1.87615e+07	23.76	4.52998e+07	1.68508e+07	3.08276e+07	24.77	1.01	4.3529
Itaconic acid_175.02494_0.948		1.84902e+06	639041	3.02224e+06	20.54	374422	1.65666e+06	2.29051e+06	20.1	-0.44	1.4444	O-ureido-D-serine_82.537_0.886		1.02231e+08	6.04881e+07	7.79507e+07	26.22	3.33009e+07	8.57827e+07	6.25973e+07	25.75	-0.47	2.81183
9-Oxononanoic acid_171.10276_5.938		963980	503591	6.61341e+06	20.49	7.22247e+06	8.90438e+06	5.05897e+06	22.71	2.22	8.10668	1-Stearoyl-2-hydroxy-sn-glycero-3-PE_482.32451_14.612		787949	1.88001e+07	251654	20.56	1.71462e+07	6.97687e+07	1.41913e+06	23.51	2.95	3.31739
Desthiobiotin_259.13007_1.257		8.72625e+06	8.20168e+06	5.17286e+06	22.78	1.00659e+07	5.64774e+06	7.35918e+06	22.83	0.05	1.14862	fMet_178.05323_0.985		7.6122e+06	4.93022e+07	5.2954e+06	23.58	5.92607e+07	7.31042e+06	9.37132e+06	23.93	0.35	1.2262
[Similar to: NP-002399; ΔMass: -264.1465 Da]_161.99403_0.792		1.25989e+06	302796	4.79306e+06	20.22	298527	2.12056e+06	2.98873e+06	20.24	0.02	1.00802	5-Methoxytryptamine_208.14439_1.709		4.76386e+07	285467	3.19199e+07	22.85	238576	224993	4.84587e+07	20.39	-2.46	1.92196
2-(4-Hydroxyphenyl)-5,6,7,8-tetramethoxy-2,3-dihydro-4H-chromen-4-one_359.11379_7.491		7345.35	3.56425e+06	45670.9	16.7	1.61944e+06	9359.95	6798.49	15.52	-1.18	1.30749	Ala-Tyr_253.11836_2.619		3.69922e+06	739355	2.09705e+07	21.88	9.64767e+06	3.00269e+07	5.68277e+07	24.6	2.72	6.23472
N~6~-(5-Oxo-D-isoleucyl)-L-lysine_272.16175_3.029		1.97653e+06	67562.2	6.50048e+06	19.86	1.06555e+06	3.23011e+06	5.80872e+06	21.37	1.51	1.95248	pregnenolone acetate_391.28464_11.052		4.4659e+07	890633005	4.31944e+07	26.84	1.62965e+07	9.58486e+07	4.5922e+07	25.31	-1.53	2.49502
diacetylphloroglucinol_209.04561_6.059		1.8262e+06	1.42368e+06	4.66862e+06	21.13	2.21399e+06	1.76645e+06	3.81802e+06	21.23	0.1	1.13686	Leu-Val_231.17034_4.202		1.31553e+07	5.27246e+06	2.72225e+07	23.56	4.57239e+07	1.75926e+07	5.79094e+07	25.1	1.54	6.72323
L-gamma-Glutamyl-L-leucine_259.13005_1.938		3.75971e+06	1.08117e+07	4.18221e+06	22.4	7.32752e+06	2.75231e+06	1.97865e+06	21.7	-0.7	2.48158	Tetraacetylethylenediamine_229.11826_1.211		2.84497e+07	5.00353e+07	3.047e+07	25.07	5.64153e+07	1.42368e+07	5.25406e+07	25.05	-0.02	1.01445
(+/-)-2-Hydroxyglutaric acid_147.03_0.922		3.30609e+06	1.55475e+06	2.5233e+06	21.16	2.96251e+06	1.6307e+06	2.79186e+06	21.18	0.02	1.03473	Artemether_299.18547_9.708		479032	309162	3.29702e+07	20.69	5.29118e+07	3.58692e+07	3.75513e+07	25.31	4.62	10.0855
(+)-geniposide_387.12995_6.347		17517.2	14464.8	6.2543e+06	16.83	6.79631e+06	4.84477e+06	7.06154e+06	22.55	5.72	8.48637	Mesalazine_186.076_1.253		5.19114e+07	8.49513e+06	6.14064e+07	24.84	9.05846e+06	5.78152e+06	4.34086e+07	23.65	-1.19	2.49296
Acetylshikonin_329.10327_7.17		34327	4.13267e+06	98471	17.88	2.31928e+06	7945.25	39610.9	16.46	-1.42	1.46699	meprobamate_219.1339_1.125		5.84575e+07	4.96576e+07	125003044	26.09	1.06754e+08	6.38936e+07	1.49694e+08	26.59	0.5	2.42622
DL-Lysine_145.0983_0.8		5.55569e+06	5.77808e+06	4.68404e+06	22.34	6.93539e+06	6.62839e+06	4.61756e+06	22.51	0.17	2.13091	7alpha-Hydroxy-3-oxochol-4-en-24-oic acid_389.26895_9.212		6.50056e+06	4.82101e+06	4.79514e+06	22.34	4.10148e+06	849042	7.81867e+06	21.52	-0.82	2.26564
meprobamate_217.1195_1.2		1.06478e+07	2.87091e+06	9.7406e+06	22.67	5.57428e+06	5.96067e+06	8.73795e+06	22.66	-0.01	1.01439	Tripropylene glycol_215.12535_5.714		512483	400241	1.7652e+07	20.55	1.16189e+08	5.86914e+07	2.24857e+07	25.67	5.12	18.5939
2-Acetylthiazole_126.00197_3.996		1.13081e+07	4.32374e+06	9.82797e+06	22.9	6.79926e+06	9.45561e+06	8.69067e+06	22.97	0.07	1.1348	Aprobarbital_211.10772_1.411		3.3542e+07	3.23903e+07	4.42146e+07	25.12	3.05181e+07	3.15366e+07	4.04616e+07	25.01	-0.11	1.59747
Leu-Leu_243.17152_5.485		488691	2.33467e+06	711738	19.83	1.04088e+06	596312	1.60351e+06	19.93	0.1	1.10126	N-(3-hydroxy-dodecanoyl)-homoserine lactone_300.21714_9.274		96391.9	79882.6	5.63918e+07	19.53	2.91541e+07	3.74788e+07	3.47886e+07	25	5.47	6.515
gaboxadol_139.05129_0.903		898147	2.06551e+06	702252	20.06	45576.3	707936	602385	18.04	-2.02	4.69892	D-Lysine lactam_129.10223_1.114		9.63142e+07	1.32267e+07	1.11029e+08	25.63	6.15289e+07	5.49907e+07	1.18214e+08	26.13	0.5	1.51862
Cyclo-(Ile-Ser)_199.10894_1.294		342712	347629	137402	17.95	338265	312644	351182	18.35	0.4	2.3436	Ro 20-1724_279.17043_6.042		2.65389e+06	557235	1.87112e+07	21.53	4.15155e+06	6.93426e+06	3.23284e+07	23.22	1.69	2.63078
Imiprothrin_317.15082_7.728		1.17974e+06	3.44731e+06	687638	20.43	769968	636350	1.39863e+06	19.75	-0.68	2.346	L-gamma-Glutamyl-L-valine_247.12884_1.109		9.85061e+07	6.71725e+07	7.5066e+07	26.24	8.8866e+07	6.78051e+07	8.72001e+07	26.27	0.03	1.10833
9,10-Dihydroxystearic acid_315.25421_11.16		399284	678169	921630	19.26	1.07095e+06	1.22071e+06	507780	19.73	0.47	2.35926	mebutamate_233.1496_2.111		1.75489e+07	6.91273e+06	3.98713e+07	24.01	1.90118e+07	2.43367e+07	6.69085e+07	24.9	0.89	2.59321
Vitamin C_175.02489_0.924		1.84902e+06	639041	3.02224e+06	20.54	374422	1.65666e+06	2.29051e+06	20.1	-0.44	1.4444	Tetraacetylethylenediamine_246.1449_1.651		9.67902e+07	3.4551e+07	6.11941e+07	25.81	5.07593e+07	4.98491e+07	9.08159e+07	25.87	0.06	1.08804
[Similar to: DL-Tryptophan; ΔMass: 21.9821 Da]_271.07016_2.807		5.86252e+06	5.35963e+06	5.24254e+06	22.39	4.58803e+06	3.1715e+06	6.49564e+06	22.12	-0.27	2.34027	N~6~-(5-Oxo-D-isoleucyl)-L-lysine_274.17624_2.939		1.19502e+07	213115	5.33086e+07	22.29	7.99357e+06	2.36235e+07	4.93403e+07	24.33	2.04	2.16772
Zizybeoside I_431.15619_7.209		9404.6	9357.95	3.77255e+06	16.08	2.99381e+06	3.08592e+06	4.394e+06	21.71	5.63	8.12988	5,6-Dihydrothymidine_227.10283_0.887		6.12058e+06	5.30384e+06	6.03562e+06	22.47	8.57007e+06	4.8631e+06	6.03571e+06	22.59	0.12	1.53328
1-(beta-D-ribofuranosyl)thymine_257.07809_1.309		6.14418e+06	1.43554e+06	3.08423e+06	21.52	4.69941e+06	5.60924e+06	2.66432e+06	21.98	0.46	1.84147	MFCD01320532_340.28485_14.589		5.45181e+07	4.47424e+07	4.55624e+07	25.52	1.21539e+07	6.35369e+07	4.67377e+07	24.98	-0.54	1.9822
Panosialin B_239.08539_9.202		137537	3.35149e+07	137557	19.71	1.31995e+06	187037	131349	18.28	-1.43	1.56023	3-Methylsulfolene_133.03165_1.269		1.92583e+07	1.87476e+07	1.73327e+07	24.14	7.33292e+06	5.12229e+06	1.14331e+07	22.85	-1.29	52.8262
Hydrocortisone caproate_459.27317_12.188		3.14145e+07	2.24529e+07	3.68593e+07	24.82	3.33168e+07	3.3129e+07	3.50813e+07	25.01	0.19	2.39207	4-Methoxy-1H,1'H-2,2'-bipyrrole-5-carbaldehyde_223.10774_2.906		7.33645e+07	1.20153e+07	2.85574e+07	24.8	4.82949e+07	6.42509e+07	8.11178e+07	25.91	1.11	4.33281
MFCD00025555_201.12459_1.307		6.49715e+06	2.1678e+06	4.29568e+06	21.9	5.61018e+06	4.35332e+06	6.0194e+06	22.33	0.43	2.34352	Gly-DL-Phe_223.10775_2.002		4.13955e+07	3.2869e+07	2.65175e+07	24.98	2.95866e+07	7.34291e+06	4.40183e+07	24.34	-0.64	2.11838
Maleic acid_115.00373_1.219		1.64145e+06	569851	652473	19.69	621556	1.27285e+06	2.23383e+06	20.21	0.52	1.93953	Ethyl acetate_89.05959_6.994		2.0083e+08	1.72261e+08	1.57777e+08	27.39	1.54839e+08	1.39551e+08	1.82752e+08	27.24	-0.15	2.74424
Oxadixyl_277.11954_2.23		1.97659e+07	1.92875e+07	1.2656e+07	24.01	2.37201e+07	1.42263e+07	1.03448e+07	23.85	-0.16	1.38655	[Similar to: 6-O-[(2E)-3-(4-Hydroxyphenyl)-2-propenoyl]-1-O-[(2E)-3-phenyl-2-propenoyl]-β-D-glucopyranose; ΔMass: -354.0952 Da]_103.05408_1.544		4.65839e+07	4.1766e+07	3.56507e+07	25.29	3.03618e+07	2.94986e+07	4.04183e+07	24.98	-0.31	6.13151
3-Thiomorpholinecarboxylic acid_146.02822_1.053		1.80143e+06	3.08877e+06	95909.2	19.63	1.64733e+06	97503.7	1.37286e+06	19.2	-0.43	1.1833	Levetiracetam_171.11277_1.065		1.15938e+07	6.1088e+06	1.20736e+07	23.18	7.73262e+06	1.08542e+07	1.49833e+07	23.36	0.18	1.46569
asn-pro_228.09914_1.211		4.48695e+06	3.60418e+06	4.73837e+06	22.02	3.49613e+06	4.39684e+06	4.0237e+06	21.92	-0.1	1.84841	O-ureido-D-serine_82.537_0.698		1.24926e+07	1.20711e+07	1.27073e+07	23.57	2.33688e+07	2.36474e+07	8.59834e+06	24	0.43	2.39185
7-ketodeoxycholic acid_405.26484_10.144		3.2128e+06	1.33302e+07	2.74476e+06	22.22	2.67453e+06	2.80685e+06	4.11299e+06	21.58	-0.64	2.27098	(3R,5R)-3-O-β-D-mannosyl-3,5-dihydrodecanoic acid_367.19655_5.329		3.11402e+07	2.9351e+07	2.24267e+07	24.71	2.96082e+07	2.27389e+07	2.39807e+07	24.59	-0.12	1.75013
Vazabitide A_270.14609_1.667		8.30275e+06	5.23714e+06	6.53238e+06	22.65	8.70387e+06	4.38045e+06	5.21316e+06	22.48	-0.17	1.53151	Ethyl acetate_89.05958_6.834		1.77188e+07	1.59233e+08	1.48609e+07	25.05	1.18419e+08	1.38018e+08	1.37072e+08	26.96	1.91	6.33525
3-Carboxyindole_206.04596_1.862		4.51865e+06	5.53414e+06	1.43727e+06	21.65	191386	2.19272e+06	1.71868e+06	19.77	-1.88	4.68206	Allantoic acid_177.06104_0.766		1.23764e+07	5.07427e+07	1.37499e+07	24.29	2.04484e+07	3.27254e+06	4.66118e+06	22.69	-1.6	5.00335
Gly-DL-Phe_221.09327_2.97		6.95708e+06	1.2623e+06	3.10267e+06	21.52	4.81784e+06	6.42202e+06	7.12895e+06	22.53	1.01	4.15113	Val-Ser_205.11819_1.118		7.0426e+07	2.2288e+07	6.04664e+07	25.44	3.63705e+07	3.28887e+07	6.61603e+07	25.36	-0.08	1.12019
[Similar to: D-(+)-Tryptophan; ΔMass: 67.9876 Da]_271.07016_2.785		5.86252e+06	5.35963e+06	5.24254e+06	22.39	4.58803e+06	3.1715e+06	6.49564e+06	22.12	-0.27	2.34027	pro-gln_244.12919_1.05		6.73373e+07	2.16895e+07	5.36854e+07	25.35	3.57185e+07	4.20504e+07	6.22656e+07	25.44	0.09	1.12915
Z-Maleylacetic acid_157.01436_1.23		3.76608e+06	1.55401e+06	6.55254e+06	21.69	519535	2.54152e+06	3.78471e+06	20.71	-0.98	2.44501	leu-gln_260.16052_1.629		4.37599e+07	6.10807e+06	3.02926e+07	24.26	2.62356e+07	1.67154e+07	5.27133e+07	24.76	0.5	1.56431
1-Stearoyl-2-hydroxy-sn-glycero-3-PE_480.30995_14.718		14897.2	2.26777e+06	20272.3	16.43	1.74026e+06	4.20313e+06	308299	20.32	3.89	4.81589	1-Palmitoyl-2-hydroxy-sn-glycero-3-PE_454.29326_13.273		531636	7.70771e+06	347848	20.1	1.46179e+07	5.56945e+07	280752	22.54	2.44	2.41246
Guvacine_240.04923_0.921		1.57845e+06	1.19544e+06	1.60658e+06	20.46	2.08307e+06	2.23921e+06	1.52147e+06	20.87	0.41	7.33229	S-Allyl-L-cysteine_162.05832_1.373		1.36967e+07	3.74511e+06	2.37267e+06	22.24	2.06174e+06	523936	1.71248e+06	20.23	-2.01	9.19895
N-(tert-Butoxycarbonyl)-L-leucine_230.13984_6.098		134239	3.44527e+06	253937	18.9	2.85976e+06	1.49228e+06	101078	19.53	0.63	1.28842	Cordycedipeptide A_228.13423_1.104		1.92211e+07	2.40201e+06	1.0199e+07	22.89	6.96522e+06	6.4926e+06	2.55848e+07	23.32	0.43	1.40159
Cytidine_242.07853_0.923		391159	604404	2.41088e+06	19.66	1.18301e+06	3.53041e+06	1.991e+06	20.95	1.29	4.33324	Rimexolone_371.25834_9.747		1.62927e+07	8.18018e+07	1.13963e+07	24.56	8.5691e+06	8.84852e+06	1.37892e+07	23.27	-1.29	4.40643
7-ketodeoxycholic acid_405.26504_10.558		2.77199e+06	8.91711e+06	2.83586e+06	21.98	1.75466e+06	989899	2.55159e+06	20.65	-1.33	8.05886	Piperidine_86.09633_2.349		2.29462e+08	1.83568e+08	2.30906e+08	27.67	1.16728e+08	1.33377e+08	1.02818e+08	26.8	-0.87	206.697
[Similar to: NP-009815; ΔMass: -61.0535 Da]_202.07542_1.251		6.24796e+06	7.76344e+06	4.87275e+06	22.56	5.93315e+06	1.54175e+07	4.02821e+06	22.77	0.21	1.34617	(2S)-2-Piperazinecarboxamide_130.09743_0.984		3.58615e+07	6.3068e+06	2.92301e+07	24.16	1.46708e+07	2.39146e+07	2.34898e+07	24.27	0.11	1.10635
Vazabitide B_288.15665_1.726		2.7758e+06	1.46699e+06	1.09937e+06	20.65	908344	1.19722e+06	2.95519e+06	20.49	-0.16	1.22276	Eglumetad_186.07602_1.243		5.19114e+07	8.49513e+06	6.14064e+07	24.84	2.25912e+07	6.73196e+06	4.34086e+07	24.16	-0.68	1.65653
S-Sulfocysteine_199.96942_0.777		1.92239e+06	1.85468e+06	4.04294e+06	21.21	990954	2.57322e+06	1.97238e+06	20.71	-0.5	2.4429	3-Tropanol_142.12261_1.121		3.05299e+07	1.78433e+06	1.15909e+06	21.93	348674	474775	2.05546e+06	19.41	-2.52	4.79239
Val-Ser_203.10375_0.943		2.58171e+06	687613	2.09251e+06	20.56	1.90107e+06	1.36866e+06	2.78656e+06	20.88	0.32	1.53228	DL-Glutamic acid_148.06047_1.053		7.98902e+07	4.65553e+07	9.83742e+07	26.09	5.75769e+07	6.06974e+07	8.25907e+07	25.98	-0.11	1.30309
[Similar to: alprazolam-d5; ΔMass: -7.1928 Da]_304.91414_19.799		1.0053e+07	8.61663e+06	537945	21.78	4.94854e+07	5.56631e+07	9.58011e+06	24.83	3.05	7.74192	Vazabitide B_290.17123_2.212		2.35105e+06	828808	3.33861e+07	21.94	6.74369e+06	9.33383e+06	4.57746e+07	23.76	1.82	2.71017
[Similar to: NP-015631; ΔMass: -54.1843 Da]_258.96024_1.015		1.11009e+06	2.94194e+06	750783	20.36	2.71974e+06	711023	91066.9	19.1	-1.26	2.18699	Veronal_185.09202_1.137		4.28197e+07	8.18785e+06	4.78237e+07	24.61	1.34205e+07	2.00205e+07	4.34709e+07	24.44	-0.17	1.15554
Val-Ser_203.10377_1.204		7.1415e+06	1.71326e+06	5.03079e+06	21.91	2.77777e+06	3.35882e+06	5.79888e+06	21.85	-0.06	1.07144	ISOXYL_212.13931_1.051		1.27926e+06	3.32074e+07	3.26217e+06	22.3	3.04373e+07	3.64421e+06	2.95027e+06	22.72	0.42	1.21045
Vazabitide B_288.1567_2.349		350888	138291	3.36655e+06	19.06	280772	1.26462e+06	4.81836e+06	20.19	1.13	1.76602	Bufa-20,22-dienolide_355.26348_9.537		1.30285e+07	1.12485e+07	9.73378e+06	23.42	8.76019e+06	9.62491e+06	1.02781e+07	23.18	-0.24	6.29374
S-Allyl-L-cysteine_160.04391_1.108		300984	33886.9	637526	17.51	958874	46408.8	50301.6	17	-0.51	1.24628	Sorbic acid_113.05961_11.117		2.03815e+06	2.07652e+06	2.77266e+07	22.22	5.84988e+07	3.92537e+07	4.78371e+07	25.51	3.29	16.7842
L-gamma-Glutamyl-L-valine_245.11441_2.207		3.93976e+06	1.18063e+07	4.01769e+06	22.45	5.80866e+06	1.10302e+07	8.27565e+06	22.95	0.5	2.26505	Hydroxycitronellal diethyl acetal_247.22686_13.187		2.74321e+07	2.71887e+07	270344	22.48	196303	349050	343044	18.13	-4.35	8.11175
5-Hydroxy-DL-tryptophan_279.09879_1.496		3.46819e+06	669658	3.56307e+06	20.95	3.19916e+06	2.18428e+06	4.52835e+06	21.59	0.64	2.03332	Oxadixyl_279.13409_2.079		176067231	2.81926e+08	1.18235e+08	27.43	450281945	1.04369e+08	8.68261e+07	27.25	-0.18	1.1845
Dehydroglycine_72.00912_1.643		3.89881e+06	1.90439e+06	2.68582e+06	21.37	2.01228e+06	1.96286e+06	1.83236e+06	20.88	-0.49	5.527	Leu-Leu_245.18598_5.937		5.70025e+06	7.27624e+06	1.9211e+06	22.04	2.16872e+07	5.86489e+06	1.46985e+07	23.55	1.51	7.37893
valtrate_421.18715_8.553		2.38364e+06	1.16374e+06	1.29385e+06	20.55	751856	1.61211e+06	1.71018e+06	20.28	-0.27	1.59942	D-Lysine lactam_129.10219_0.955		2.84353e+07	1.32267e+07	2.08528e+07	24.24	1.63047e+07	2.45965e+07	2.39049e+07	24.34	0.1	1.23655
[Similar to: Glycylproline; ΔMass: 0.9453 Da]_172.02286_0.822		830359	222115	3.04575e+06	19.65	459057	1.42276e+06	2.07163e+06	20.08	0.43	1.32245	Levetiracetam_171.1128_6.453		1.15363e+07	939026	3.14592e+07	22.74	2.13775e+06	9.41049e+06	3.5637e+07	23.09	0.35	1.1621
NJ5000000_184.10927_1.241		51348.7	49023.3	56610.5	15.67	42748.2	35481.3	53234.9	15.4	-0.27	4.9155	(-)-Lupinine_187.1805_3.803		2.05406e+07	1.54132e+06	4.05819e+06	22.27	1.13115e+06	94129.7	2.41031e+06	19.28	-2.99	5.90828
3-Hydroxynonanoic acid_173.11839_7.518		1.76396e+06	1.48524e+06	1.19506e+06	20.48	1.94402e+06	2.09436e+06	817678	20.51	0.03	1.04997	Gly-Leu_189.12333_0.928		5.46645e+07	3.23248e+07	1.49877e+07	24.83	1.44284e+07	4.75765e+07	6.78954e+07	25.1	0.27	1.29975
.alpha.-Aminoadipic acid_160.06164_0.928		4.08957e+06	1.81539e+06	2.86878e+06	21.4	2.30974e+06	1.58183e+06	4.59723e+06	21.29	-0.11	1.1773	3-Thiomorpholinecarboxylic acid_148.04272_1.031		3.10662e+07	7.18771e+07	2.72522e+06	24.12	4.9388e+07	7.69669e+06	2.79044e+07	24.39	0.27	1.14
Stearoyl adenylate_612.31567_7.213		1.28147e+06	7114.22	1.54348e+06	17.88	311216	481546	2.8452e+06	19.52	1.64	1.72544	L-gamma-Glutamyl-L-valine_247.12883_0.894		1.99836e+07	6.71725e+07	1.47234e+07	24.69	2.23673e+07	6.79468e+07	1.9992e+07	24.9	0.21	1.21266
Vazabitide B_288.15671_2.558		342353	169335	3.99101e+06	19.23	254210	1.31126e+06	6.9576e+06	20.34	1.11	1.66547	Vigabatrin_171.11279_1.809		9.69207e+07	3.52996e+07	5.97476e+07	25.81	3.06784e+07	3.8461e+07	5.07652e+07	25.22	-0.59	3.60014
Leu-Val_229.15585_4.245		903280	411083	2.02376e+06	19.79	4.26722e+06	1.68846e+06	4.10028e+06	21.56	1.77	11.0637	Styrene_105.06975_2.587		1.84069e+07	1.09829e+07	6.53441e+06	23.39	2.25911e+06	7.43556e+06	1.25652e+07	22.51	-0.88	2.79293
Hept-2-ulose_209.06678_0.865		3.74313e+06	330706	2.99008e+06	20.56	151540	412280	1.92627e+06	18.91	-1.65	2.88867	15,16-DiHODE_313.23747_9.371		2.20814e+06	9.85802e+06	3.46502e+06	22.01	7.12681e+06	6.92739e+06	2.39317e+06	22.23	0.22	1.24061
mebutamate_231.13513_2.214		1.78465e+06	669827	2.97968e+06	20.54	2.40363e+06	2.26079e+06	5.42082e+06	21.56	1.02	4.03792	metominostrobin_302.15008_6.065		2.49681e+07	2.11442e+07	1.57797e+07	24.27	4.00379e+07	1.19907e+07	1.48667e+07	24.2	-0.07	1.1081
Cladosporester C_287.15018_7.038		20032.9	241595	1.82793e+06	17.66	4.07064e+06	2.51414e+06	2.29605e+06	21.45	3.79	8.56428	2-Pyrrolidone_86.06017_1.275		51390114	1.74269e+07	5.65252e+07	25.14	2.66925e+07	1.15516e+07	5.42495e+07	24.61	-0.53	1.77834
Biacetyl_85.02948_1.359		5.4264e+06	1.64552e+06	2.42444e+06	21.41	8.85595e+06	7.75307e+06	5.0476e+06	22.74	1.33	13.001	Vorinostat_265.15474_4.843		5.07713e+06	1.51339e+06	1.2877e+07	22.14	1.91651e+07	6.7811e+06	1.67878e+07	23.63	1.49	4.6503
Dibutyl malate_245.13955_7.438		576270	1.65561e+06	944347	19.88	1.31249e+06	1.11344e+06	459134	19.74	-0.14	1.19532	MFCD00025555_203.1389_2.082		2.09691e+07	1.26028e+07	1.86539e+07	24.02	3.76474e+06	9.18383e+06	2.27084e+07	23.14	-0.88	3.1151
6-Deoxy-3-O-methyl-beta-D-galactopyranose_177.07694_1.311		34355.8	88056.5	4.96227e+06	17.91	5.61476e+06	5.12576e+06	3.75725e+06	22.18	4.27	7.99539	Ethanal tetramer_177.11208_7.098		1.15087e+08	9.9951e+07	1.86167e+07	25.83	9.39063e+07	5.54834e+07	1.0105e+08	26.27	0.44	1.53542
[Similar to: 2-(4-Methyl-3-cyclohexen-1-yl)-2-propanyl 6-O-(6-deoxy-α-L-mannopyranosyl)-β-D-glucopyranoside; ΔMass: -300.3237 Da]_160.91552_0.81		2.00426e+06	1.63878e+06	1.83873e+06	20.8	1.45573e+06	1.40266e+06	1.81958e+06	20.56	-0.24	5.53192	Coumarin_147.04407_1.046		2.72459e+07	2.17171e+07	1.66994e+07	24.36	2.05057e+07	1.78503e+07	2.15616e+07	24.25	-0.11	1.54184
3-Methylbutanoic acid_101.06077_2.497		105490	272437	314077	17.67	188840	168167	321055	17.73	0.06	1.08309	Triethylene glycol dimethacrylate_304.17566_9.96		74726.6	195523	8.39133e+06	18.92	2.68739e+07	1.19139e+07	1.58624e+07	24.03	5.11	13.8527
Furcatin_427.16128_7.716		8424.2	7693.21	2.05418e+06	15.64	1.59409e+06	1.73706e+06	2.44568e+06	20.85	5.21	8.13656	1-Piperideine_84.08068_1.031		1.44488e+08	6.45615e+07	5.49476e+08	27.36	4.3599e+07	1.25224e+08	6.43344e+07	26.07	-1.29	3.72153
D-Gluconic acid_195.05113_0.835		3.57932e+06	1.11288e+06	3.38372e+06	21.18	3.55708e+06	3.23603e+06	2.56933e+06	21.56	0.38	1.84834	Valyl-4-hydroxyproline_272.16061_1.549		2.2751e+08	9.96862e+07	9.74296e+07	26.96	1.28371e+08	7.31045e+07	1.116e+08	26.6	-0.36	2.04876
n-heptanoic acid_189.11332_7.258		411976	2.67272e+06	446924	19.59	2.8191e+06	2.94668e+06	502935	20.62	1.03	2.24481	DL-Glutamic acid_148.06047_0.778		1.23581e+07	4.73364e+06	1.38766e+07	23.15	8.89282e+06	10173911	1.21334e+07	23.3	0.15	1.26662
gamma-glutamyltyramine_265.11953_1.496		3.20955e+06	753979	2.68823e+06	20.83	2.16142e+06	2.0256e+06	3.40527e+06	21.23	0.4	1.66985	Leu-Leu_245.18602_5.472		6.99515e+06	3.45361e+06	1.02093e+07	22.58	1.16288e+07	8.70918e+06	2.54612e+07	23.71	1.13	6.33116
Traumatic Acid_227.12898_10.564		2.85034e+06	561246	823546	20.06	621771	978750	1.14846e+06	19.76	-0.3	1.41397	aspergillic acid_242.18639_2.149		2.05687e+07	2.13132e+07	1.84097e+07	24.26	1.87686e+07	3.02159e+07	2.11613e+07	24.45	0.19	2.34351
Phenylethyl alcohol_121.06593_6.434		658932	69715.4	61911.2	17.11	790976	3.49631e+06	5.00347e+06	21.2	4.09	24.1961	3-(2,4-Cyclopentadien-1-ylidene)-5alpha-androstan-17beta-ol_339.26848_10.996		8.74601e+06	4.64868e+06	2.32083e+06	22.12	4.70885e+06	1.92169e+06	5.86363e+06	21.84	-0.28	1.37484
Triethyl citrate_275.11383_4.685		17131.4	81445.5	6.50948e+06	17.67	2.22667e+06	3.08077e+06	2.82459e+06	21.36	3.69	4.45151	L-gamma-Glutamyl-L-leucine_261.14455_1.834		1.60061e+07	5.07679e+07	1.69113e+07	24.51	2.46999e+07	1.14109e+07	6.20655e+06	23.52	-0.99	3.58814
Leucylasparagine_244.1304_1.219		5.63187e+06	1.5066e+06	4.70376e+06	21.7	2.01181e+06	4.22075e+06	5.72303e+06	21.8	0.1	1.10495	1,4-Dimethylimidazole_97.07588_0.96		622290	4.29814e+06	292530	19.81	538744	4.99592e+06	493796	20.07	0.26	1.13583
L-(+)-Valine_116.07176_2.192		5.7575e+07	3.22425e+07	2.59003e+07	25.12	1.46544e+07	4.21205e+07	4.99415e+07	24.9	-0.22	1.31709	1-Deoxy-1-(4-morpholinyl)-alpha-D-fructofuranose_250.12854_1.433		3.83808e+07	2.08057e+07	4.60332e+06	23.88	4.07038e+06	685449	1.54388e+07	21.74	-2.14	4.01167
pentoxyl_155.04633_1.076		111184	127757	616337	17.65	55632.5	265486	209874	17.15	-0.5	1.51123	His-Leu_269.16083_1.065		2.67826e+07	1.73524e+07	2.83998e+07	24.49	4.98069e+07	2.97822e+07	4.08364e+07	25.23	0.74	12.792
Yangonin_257.08204_9.357		1.00403e+06	122409	1.46108e+06	19.11	24611.3	80818.5	3.42773e+06	17.53	-1.58	1.81574	Desthiobiotin_215.13896_2.712		2.96937e+07	2.45993e+07	2.42762e+07	24.64	1.82312e+07	2.10708e+07	2.08933e+07	24.26	-0.38	33.2425
Ro 20-1724_277.15591_6.498		253971	411308	658803	18.64	746072	618126	1.62021e+06	19.79	1.15	8.33021	Leucylasparagine_246.14483_1.144		5.44026e+07	2.00969e+07	4.9221e+07	25.17	2.12883e+07	3.43267e+07	4.98911e+07	24.98	-0.19	1.31142
Cinnamic acid_147.0452_6.32		3.26985e+06	931384	1.83627e+06	20.76	1.16048e+06	959431	878336	19.92	-0.84	5.17274	L-gamma-Glutamyl-L-valine_247.12886_1.84		1.56623e+07	4.68004e+07	1.65741e+07	24.45	4.6068e+07	3.51756e+07	2.59409e+07	25.05	0.6	2.84605
(2S)-3-Hydroxy-1,2-propanediyl dibutanoate_231.12388_7.171		531828	2.72587e+06	345427	19.6	2.82486e+06	2.24072e+06	402543	20.38	0.78	1.75183	N-Tricosanoylglycine_444.40509_16.547		5.12323e+06	2.75915e+07	4.22221e+06	23.01	85422.4	863704	1.2836e+07	19.91	-3.1	4.13198
[Similar to: methyl 3-({[(2-thienylcarbonyl)amino]carbothioyl}amino)benzoate; ΔMass: -149.0298 Da]_169.99185_3.995		6.78963e+06	2.57052e+06	6.03342e+06	22.17	4.11228e+06	5.67671e+06	3.71992e+06	22.08	-0.09	1.16857	Propoxur_227.13911_4.175		4.19634e+07	3.05548e+07	3.57012e+07	25.09	2.72796e+07	3.01256e+07	4.04394e+07	24.94	-0.15	1.94238
3-Hydroxyoctanoic acid_159.10277_1.426		131126	27408.1	1.51977e+06	17.43	3.21768e+06	1.76722e+06	2.49548e+06	21.21	3.78	11.0178	N-{3-[(4-Acetamidobutyl)amino]propyl}acetamide_230.18626_1.035		364444	2.99089e+06	3.3983e+06	20.56	2.3931e+06	8.87069e+06	1.1685e+06	21.48	0.92	1.86764
N-Methylanhalonine_234.11366_8.166		1.73757e+06	1.36957e+06	1.59712e+06	20.57	1.54905e+06	982036	1.60937e+06	20.36	-0.21	2.24626	Cassaidine_408.31111_11.955		4.30511e+06	3.58257e+06	837075	21.16	1.10174e+06	5.52756e+06	1.87764e+06	21.1	-0.06	1.04512
(+/-)-2-Hydroxyglutaric acid_147.02994_4.359		372759	263778	678836	18.63	1.54954e+06	1.68422e+06	543657	20.1	1.47	11.1691	N-(3-hydroxy-dodecanoyl)-homoserine lactone_300.21711_10.081		438986	54539	2.58515e+07	19.7	1.26703e+07	1.38138e+07	1.60921e+07	23.75	4.05	5.10425
(+/-)-2-Hydroxyglutaric acid_147.02997_1.27		5.19184e+06	2.91425e+06	3.58913e+06	21.85	3.7684e+06	3.01274e+06	4.00534e+06	21.77	-0.08	1.2974	5-Nitro-2-propoxyaniline_229.11832_2.886		2.0323e+07	4.76097e+06	1.66974e+07	23.48	1.28249e+07	3.80004e+07	9.85558e+06	24.01	0.53	1.70621
ALA-PRO_185.09324_0.971		1.17655e+06	447591	965496	19.61	598958	2.76652e+06	2.37371e+06	20.59	0.98	3.36954	Diethylene glycol_129.0522_1.044		1.5983e+07	1.73319e+07	1.60831e+07	23.97	9.02428e+06	1.13785e+07	1.44799e+07	23.44	-0.53	17.2295
Cephalosporolide J_215.09261_3.052		339807	19059.2	2.17492e+06	17.88	4.59842e+06	3.35375e+06	4.13539e+06	21.93	4.05	8.92674	1-(4-Aminobutyl)urea_132.11311_0.952		2.08028e+06	1.2345e+07	3.04904e+06	22.03	2.42271e+06	316578	3.52691e+06	20.41	-1.62	3.43092
Troxipide_293.15089_4.462		878588	262785	3.01716e+06	19.76	1.5364e+06	1.29662e+06	3.4623e+06	20.86	1.1	2.66335	diacetyl trimer_259.11768_4.37		101235	95237.6	3.63279e+07	19.43	2.40783e+07	2.42932e+07	3.29275e+07	24.68	5.25	7.19005
Ro 20-1724_277.15587_6.043		230456	64301.2	1.10235e+06	17.95	833651	489989	1.97338e+06	19.83	1.88	4.36367	Histamine_112.08679_0.852		6.59455e+06	1.97869e+06	3.18195e+06	21.72	5.79573e+06	3.90437e+06	5.80322e+06	22.28	0.56	2.75572
Tetrahydrofuran_117.05573_1.488		4.13849e+06	4.70084e+06	4.35737e+06	22.07	2.43741e+06	3.62584e+06	3.52719e+06	21.59	-0.48	15.0125	Maleamic acid_116.03411_0.775		417317	178001	701854	18.51	332073	770831	869991	19.21	0.7	2.56872
Azelaic acid, bis(2-hydroxyethyl) ester_275.15017_6.647		441695	323328	2.06859e+06	19.35	1.62966e+06	1.29513e+06	1.89535e+06	20.6	1.25	4.73109	Levulinic acid_117.05452_1.402		1.70492e+07	1.00367e+07	1.54499e+07	23.72	3.36379e+07	2.24286e+07	9.88589e+06	24.22	0.5	2.31975
MBJ-0110_562.28876_7.492		61907.6	11519	2.23999e+06	16.83	276277	1.01981e+06	3.62282e+06	19.94	3.11	3.5785	HC Blue 1_256.12915_1.293		4.07344e+06	2.4238e+06	2.19152e+06	21.41	6.51366e+06	1.5769e+06	974971	21.04	-0.37	1.44625
[Similar to: Glycyl-L-leucine; ΔMass: 44.9382 Da]_232.04703_0.8		1.17419e+06	1.2532e+06	1.43221e+06	20.29	2.71754e+06	130447	215469	18.69	-1.6	3.27478	Cyclo-(Ile-Ser)_201.12337_1.463		6.22483e+07	3.72458e+07	5.08966e+07	25.55	1.17117e+07	3.93257e+07	5.15619e+07	24.78	-0.77	3.053
Ro 20-1724_277.15586_6.227		633207	1.00473e+06	1.25179e+06	19.82	2.31305e+06	476197	2.22054e+06	20.36	0.54	1.85495	Propionic acid_75.04403_1.712		6.61496e+06	8.32549e+06	3.18977e+06	22.42	6.9551e+06	3.87282e+06	1.4698e+06	21.7	-0.72	2.4518
(2S)-5-Carbamimidamido-2-(2-oxo-1-azetidinyl)pentanoic acid_227.11509_0.872		2.61819e+06	2.02489e+06	2.23568e+06	21.12	2.77269e+06	2.28202e+06	2.5788e+06	21.27	0.15	3.12357	TO0127900_173.16482_2.473		1.36806e+06	2.05455e+06	498653	20.09	207304	282170	415810	18.14	-1.95	22.5805
2-(3-Hydroxy-3,4,5,6-tetrahydro-1H-cyclopenta[c]furan-4-yl)-3-methoxy-3-oxopropanoic acid_301.09304_5.959		106817	42603.1	1.2303e+06	17.44	4.39667e+06	2.60181e+06	2.74506e+06	21.59	4.15	21.0881	2-[(5Z)-5-tetradecenyl]cyclobutanone_265.25271_14.108		1.35219e+07	1.91028e+07	1.87503e+07	24.01	1.34385e+07	5.49119e+06	1.60034e+07	23.33	-0.68	4.00255
Oxybis(methyl-2,1-ethanediyl) diacrylate_241.10828_6.393		2.77806e+06	998811	2.65405e+06	20.89	1.84879e+06	982293	2.04614e+06	20.56	-0.33	1.65703	Tetraacetylethylenediamine_229.11824_2.371		6.46877e+06	7.61725e+06	5.89097e+06	22.66	2.85236e+06	6.39973e+06	7.01398e+06	22.27	-0.39	2.44976
(2S,3R,5S)-3-(2-Aminoethyl)-7-oxo-4-oxa-1-azabicyclo[3.2.0]heptane-2-carboxylic acid_199.07257_1.18		2.44554e+06	1.66774e+06	2.12906e+06	20.97	2.37151e+06	5.08411e+06	2.8229e+06	21.63	0.66	6.64814	5-Amino-6-(4-hydroxybutanoyl)-2,2-dimethyl-2,3-dihydro-4H-chromen-4-one_295.16541_4.422		7.25422e+06	1.31674e+06	3.26287e+07	22.69	1.55391e+07	1.05939e+07	3.50506e+07	24.1	1.41	2.61558
4-Aminopyridine_139.05135_0.878		898147	2.06551e+06	702252	20.06	201830	707936	602385	18.75	-1.31	6.60083	Acetanilide_136.07565_1.326		3.59476e+07	3.1871e+07	2.07617e+07	24.78	1.79946e+07	1.64194e+07	1.99273e+07	24.11	-0.67	17.523
(-)-Febrifugine_300.13551_6.026		1.56791e+06	1.42657e+06	1.02958e+06	20.33	3.03973e+06	865116	1.09195e+06	20.44	0.11	1.15581	(2S)-5-Carbamimidamido-2-(2-oxo-1-azetidinyl)pentanoic acid_229.12943_0.916		3.49363e+07	2.53882e+07	3.61399e+07	24.92	3.51643e+07	2.77511e+07	3.69167e+07	24.98	0.06	1.25183
5-Nitro-2-propoxyaniline_241.08321_1.132		3.24492e+06	475211	3.63171e+06	20.76	3.94213e+06	5.3226e+06	4.5684e+06	22.13	1.37	4.38577	Butabarbital_213.12335_0.931		7.3701e+06	1.28839e+06	1.33658e+07	22.26	1.37158e+07	1.38926e+07	1.31499e+07	23.7	1.44	4.35375
NS1800000_182.04598_1.262		1.83538e+06	1.08899e+06	742722	20.12	436109	636357	708211	19.15	-0.97	11.3085	terizidone_303.10762_5.647		331784	253047	1.80353e+07	20.13	4.41155e+07	2.32159e+07	2.65096e+07	24.84	4.71	12.6477
Dipropyleneglycol methyl ether acetate_189.11332_7.174		411976	1.35145e+06	446924	19.26	1.35802e+06	1.32801e+06	502935	19.88	0.62	2.26998	gamma-Aminobutyric acid_104.07049_0.938		3.30089e+07	8.77082e+06	1.19041e+07	23.85	5.60758e+06	1.03022e+07	2.39214e+07	23.41	-0.44	1.59303
Combretastatin A-4_315.12399_7.179		1.51775e+06	1.82696e+06	928525	20.39	52566.6	8448.43	1.31571e+06	16.35	-4.04	7.48492	3-Dimethylaminopiperidine_146.16519_0.96		7.9636e+06	1.02203e+07	7.16273e+06	22.99	3.08916e+06	7.40055e+06	9.66259e+06	22.53	-0.46	2.38172
5-Hexyl-2-oxotetrahydro-3-furancarboxylic acid_213.11331_8.598		1.16273e+06	1.94432e+06	3.08278e+06	20.87	2.30673e+06	2.11217e+06	2.19583e+06	21.07	0.2	1.56261	porphobilinogen_227.10279_1.039		8.9661e+06	7.08496e+06	9.24213e+06	23	2.25147e+07	1.01262e+07	1.04604e+07	23.67	0.67	6.10918
[Similar to: Succinic acid ; ΔMass: 157.8679 Da]_274.88719_0.877		1.08189e+06	251541	85073.1	18.12	616168	114961	313856	18.1	-0.02	1.0116	MFCD00142316_267.134_1.416		4.26168e+07	7.04047e+06	3.01401e+07	24.31	2.26334e+07	2.23148e+07	4.36955e+07	24.74	0.43	1.55479
Gly-DL-Phe_221.09327_2.092		2.55965e+06	1.82066e+06	2.11203e+06	21.03	1.96026e+06	575300	3.04747e+06	20.53	-0.5	1.89324	DL-Glutamine_147.07643_1.027		4.33554e+07	2.60637e+07	2.24402e+07	24.81	2.83302e+07	1.40655e+07	1.80195e+07	24.2	-0.61	4.64544
Zizybeoside I_431.15621_6.967		11588.2	12545.5	1.64094e+06	15.92	1.50088e+06	1.64676e+06	1.87861e+06	20.67	4.75	8.69414	Troxipide_295.16538_4.408		7.25422e+06	1.31674e+06	3.26287e+07	22.69	1.40894e+07	1.05939e+07	3.50506e+07	24.05	1.36	2.51124
Leu-Leu_243.17145_5.926		424671	602130	358801	18.78	840496	563717	991413	19.57	0.79	13.4895	9,10-Dihydroxystearic acid_299.25823_12.35		9.19632e+06	1.07972e+07	9.25252e+06	23.21	9.78723e+06	7.58593e+06	6.79638e+06	22.92	-0.29	5.82706
Azelaic acid, bis(2-hydroxyethyl) ester_275.15017_6.801		203591	197877	2.44507e+06	18.82	2.32765e+06	1.83093e+06	2.10802e+06	20.99	2.17	6.82962	1-Methyl-N-(9-methyl-9-azabicyclo[3.3.1]non-3-yl)-1H-indazole-3-carboxamide_313.20121_8.694		162812	128984	1.88196e+07	19.49	3.18873e+07	2.32389e+07	2.26451e+07	24.61	5.12	10.5882
n-Butyl lactate_145.08706_7.562		1.16929e+06	959811	2.14606e+06	20.35	4.69898e+06	3.5851e+06	1.26033e+06	21.4	1.05	5.08883	aspergillic acid_242.18639_2.865		2.40935e+07	2.60072e+07	2.11692e+07	24.5	2.32898e+07	2.79963e+07	2.20715e+07	24.54	0.04	1.27161
epsilon-(gamma-Glutamyl)-lysine_274.14104_1.42		5.26451e+06	471979	3.75504e+06	21.01	1.72398e+06	2.05191e+06	4.62364e+06	21.28	0.27	1.2059	3,4-dehydrothiomorpholine-3-carboxylic acid_146.02705_1.034		2.15181e+07	3.95976e+06	1.97028e+07	23.5	5.8678e+06	4.09328e+06	1.92794e+07	22.88	-0.62	1.71144
MFCD00025555_201.12459_2.21		1.67296e+06	1.55425e+06	1.21243e+06	20.48	831171	1.32878e+06	2.01557e+06	20.32	-0.16	1.44174	Vazabitide B_290.17127_2.455		2.06861e+06	1.09476e+06	3.22275e+07	21.99	1.47796e+06	8.97058e+06	4.32412e+07	22.99	1	1.52738
Dinemasone A_229.10823_6.299		185007	372360	2.76607e+06	19.13	2.9185e+06	1.53327e+06	2.09655e+06	21.01	1.88	5.17216	Aminolevulinic acid_132.06571_1.353		1.93917e+07	1.51588e+07	1.55628e+07	23.98	1.69164e+07	1.44738e+07	6.31518e+06	23.46	-0.52	3.16653
2-(Diethoxymethyl)furan_169.08708_9.487		987008	1.79119e+06	673541	20.02	2.33117e+06	1.25522e+06	759926	20.32	0.3	1.52767	Rimexolone_371.25835_10.346		7.02488e+06	1.82872e+07	9.7777e+06	23.36	8.45189e+06	1.11376e+07	5.36476e+06	22.92	-0.44	2.28765
Oxagrelate_275.10392_2.066		1.73674e+06	1.59133e+06	1.83668e+06	20.71	1.26644e+06	1.71587e+06	1.86266e+06	20.6	-0.11	1.73245	L-coprine_203.10242_0.91		4.48954e+07	1.65696e+07	3.6545e+07	24.84	3.12669e+07	2.05909e+07	3.49911e+07	24.75	-0.09	1.15695
Triethyl citrate_275.1138_5.318		177447	236976	3.54253e+06	19.02	3.03307e+06	2.48078e+06	2.41968e+06	21.33	2.31	5.91198	Leu-Gly-Pro_286.17633_3.691		1.05155e+08	7.6617e+07	8.3905e+07	26.39	9.19356e+07	5.01512e+07	9.14707e+07	26.16	-0.23	1.93054
[Similar to: Deoxycholic acid; ΔMass: 43.0062 Da]_434.29162_11.804		3.0156e+06	2.59249e+06	2.79171e+06	21.41	5.35674e+06	5.21186e+06	4.47568e+06	22.25	0.84	830.565	Piperidine_86.09634_2.112		5.32403e+07	2.96115e+07	4.33073e+07	25.28	1.39307e+07	3.33919e+07	4.00289e+07	24.66	-0.62	3.27968
[Similar to: 5-oxo-5-[4-(1H-pyrrol-1-yl)piperidino]-3-(3,4,5-trimethoxyphenyl)pentanoic acid; ΔMass: -0.0037 Da]_429.1994_1.784		265403	254122	81600.1	17.43	3.03261e+06	2.4546e+06	251186	20.23	2.8	10.706	N,N-(2,2-dihydroxy-ethyl) arachidonoyl amine_392.31616_11.849		1.84662e+07	1.2898e+07	1.7797e+07	23.95	3.45253e+07	3.50826e+07	1.8709e+07	24.75	0.8	12.9487
1-(5-O-Phosphono-beta-D-ribofuranosyl)-1,2-dihydropyrimidine_293.05485_1.379		79028	48698.2	451933	16.88	428877	1.0306e+06	304786	18.97	2.09	7.57846	9,10-Dihydroxystearic acid_299.25822_11.323		1.6338e+06	1.83753e+06	9.16227e+06	21.53	4.00301e+06	1.10638e+06	2.84372e+06	21.15	-0.38	1.38934
[Similar to: Glycylproline; ΔMass: -0.0359 Da]_231.06315_0.835		2.79225e+06	90435.6	1.78036e+06	19.55	1.02081e+06	3.53115e+06	2.87908e+06	21.06	1.51	2.42934	pro-gln_244.12913_1.432		5.1056e+06	2.89536e+06	1.12898e+07	22.39	1.52924e+06	5.71662e+06	4.38788e+06	21.69	-0.7	2.30532
(±)-1-Octen-3-ol_173.11839_8.451		1.27112e+06	1.22386e+06	652685	19.94	1.6304e+06	1.5977e+06	664974	20.2	0.26	1.5331	Eglumetad_227.10267_1.45		4.71955e+07	3.4078e+07	2.95206e+07	25.11	3.00596e+07	3.47341e+07	3.89346e+07	25.04	-0.07	1.31709
PYRIDOXAMINE_213.0882_1.735		7.66195e+06	6.42795e+06	6.46748e+06	22.7	5.79864e+06	7.53413e+06	6.42824e+06	22.64	-0.06	1.46463	oxazolidinone_120.06544_1.038		3.58958e+07	1.07448e+07	5.29562e+07	24.7	2.84808e+07	3.54274e+07	4.53172e+07	25.09	0.39	1.61654
L-Proline_114.05609_0.897		3.81566e+06	2.0775e+06	2.57114e+06	21.38	2.91609e+06	3.48206e+06	1.40049e+06	21.21	-0.17	1.36018	Aucubin_347.13387_5.976		138159	137938	1.6731e+06	18.27	5.18248e+06	3.41786e+06	5.71076e+06	22.15	3.88	29.6824
[Similar to: NP-019714; ΔMass: 45.9696 Da]_533.3125_9.947		35433.8	16942.3	36505.6	14.77	16529.5	63495.5	30127	14.95	0.18	1.2423	Dambonitol_231.08387_1.635		2.32235e+07	1.50359e+07	2.1034e+07	24.21	1.14151e+07	1.37389e+07	1.74477e+07	23.74	-0.47	7.07174
Musacin A_245.10316_5.965		8451.8	24529.4	257919	15.2	1.49229e+06	1.35987e+06	1.72284e+06	20.53	5.33	45.996	(−)-nabilone_373.27398_9.082		1.26883e+07	9.96776e+06	8.98897e+06	23.32	2.12477e+07	7.27107e+06	1.52093e+07	23.66	0.34	1.97069
cis-2-Carboxycyclohexyl-acetic acid_185.08202_4.672		1.27773e+06	724577	4.45329e+06	20.61	3.68014e+06	2.86596e+06	2.30328e+06	21.47	0.86	2.89541	Thiamine_265.11179_0.915		270710	228637	238173	17.9	232181	228853	251419	17.86	-0.04	1.65077
leu-gln_258.14604_1.191		1.72076e+06	372984	1.50441e+06	19.91	2.53933e+06	1.63224e+06	1.24305e+06	20.72	0.81	2.83507	(3S,9aS)-3-(1H-Imidazol-5-ylmethyl)tetrahydro-2H-pyrido[1,2-a]pyrazine-1,4(3H,6H)-dione_249.13453_1.295		1.38491e+07	1.34952e+07	1.17556e+07	23.63	7.81804e+06	1.75671e+07	1.34915e+07	23.55	-0.08	1.2089
Tetraacetylethylenediamine_227.10389_3.708		1.96698e+06	1.92366e+06	1.66613e+06	20.82	1.61841e+06	1.84993e+06	1.44379e+06	20.64	-0.18	4.37865	6-hydroxypseudooxynicotine_227.13908_1.07		5.4292e+06	2.41472e+06	1.09505e+06	21.21	6.52845e+06	1.89943e+06	2.57655e+06	21.6	0.39	1.47896
1228222_261.08819_5.05		1.9857e+06	2.9349e+06	1.50945e+06	20.98	2.55446e+06	2.5444e+06	1.8224e+06	21.12	0.14	1.47147	L-(-)-Threonine_120.06541_1.055		3.58958e+07	1.07448e+07	5.29562e+07	24.7	2.84808e+07	3.54274e+07	4.53172e+07	25.09	0.39	1.61654
Z-Maleylacetic acid_157.01411_0.924		764016	344921	1.52605e+06	19.49	58517.8	734253	860890	18.35	-1.14	2.17985	porphobilinogen_227.1026_1.519		4.71955e+07	3.4078e+07	2.95206e+07	25.11	3.00596e+07	3.47341e+07	3.89346e+07	25.04	-0.07	1.31709
Flavokawain A_313.10828_8.133		9244.23	1.69981e+06	63956.9	16.61	12651.7	10871.9	8046.13	13.34	-3.27	4.73008	Rolofylline_379.20937_10.661		103363	99734.4	1.36426e+07	18.99	2.07697e+07	1.92573e+07	9.39234e+06	23.89	4.9	9.17271
Xylitol_151.06123_0.788		3.14871e+06	708581	404697	19.88	3.36905e+06	649086	1.11439e+06	20.36	0.48	1.44199	hexobarbital_237.12341_1.976		6.61823e+06	1.22663e+07	5.75815e+06	22.89	1.59714e+07	7.30603e+06	2.07708e+07	23.68	0.79	4.29662
2-Pyrrolidone_215.10388_0.944		1.94128e+06	208338	462677	19.13	452944	341202	439403	18.64	-0.49	1.57426	ethirimol_242.18639_2.137		2.05687e+07	2.13132e+07	1.84097e+07	24.26	4.93065e+06	3.02159e+07	2.11613e+07	23.81	-0.45	1.65739
Roxatidine_305.18721_8.811		876188	10421.6	758737	17.54	75364	17595.5	25564.4	14.98	-2.56	3.25131	tert-Butyl 3-amino-1-methyl-2,3-dioxopropylcarbamate_217.11819_0.916		1.51437e+07	3.44048e+06	9.50024e+06	22.92	9.02364e+06	7.97277e+06	1.1695e+07	23.17	0.25	1.39769
8-Epideoxyloganic acid_359.13489_8.85		12127.3	12443.3	10579.4	13.51	132025	27301.7	361321	16.74	3.23	24.223	ACPC_102.0548_1.034		4.04573e+07	1.3901e+07	1.70502e+07	24.34	2.65202e+07	2.78966e+07	3.90341e+07	24.87	0.53	2.84133
Sorbitan, monododecanoate_345.22833_8.339		1.4957e+06	5.94284e+06	1.87469e+06	21.28	6.56653e+06	5.45661e+06	1.38202e+06	21.81	0.53	1.64762	(2beta,3beta,6beta,14S)-5,10,16-Trihydroxy-2,3-epoxygrayanotoxane-6,14-diyl diacetate_453.24879_11.737		212168	169437	3.25645e+06	18.9	4.2469e+06	4.03935e+06	4.65804e+06	22.04	3.14	11.8919
L-gamma-Glutamyl-L-methionine_277.08672_1.396		4.26546e+06	1.90259e+06	3.41597e+06	21.53	3.18292e+06	2.31424e+06	4.5255e+06	21.62	0.09	1.17365	Lysylvaline_246.18118_0.898		9.00373e+06	4.84616e+06	2.52331e+07	23.3	4.73897e+06	2.68101e+07	3.78641e+07	24.01	0.71	1.74344
Heptenal_111.08157_6.401		559313	2.23918e+06	529067	19.73	2.30437e+06	1.75223e+06	517038	20.29	0.56	1.68781	Aminohippuric acid_212.10291_1.19		1.84706e+07	1.49908e+07	1.52543e+07	23.95	1.64164e+07	1.40574e+07	1.7082e+07	23.91	-0.04	1.23498
Bis(2-ethylhexyl) phthalate_389.26992_11.503		1.02989e+06	5.34152e+06	531495	20.45	845437	1.05697e+06	969865	19.86	-0.59	1.70065	Xefoampeptide C_482.36092_13.629		57890.7	2.36083e+06	56312.7	17.59	4.99233e+06	2.03247e+07	482997	21.8	4.21	6.58363
asn-val_230.1147_1.236		3.46964e+06	1.96703e+06	2.20908e+06	21.24	3.04192e+06	2.04589e+06	2.44243e+06	21.24	0	1.00994	Leucylasparagine_246.14485_2.154		3.077e+07	7.80298e+06	2.30087e+07	24.08	5.26766e+06	8.29063e+06	3.42736e+07	23.45	-0.63	1.75853
N-Acetyl-L-glutamic acid_188.05656_1.282		1.59965e+06	1.68646e+06	3.66818e+06	21.03	3.30567e+06	1.80592e+06	3.70829e+06	21.42	0.39	2.06309	MFCD00129785_375.28965_10.291		810962	3.98948e+06	155633	19.6	147830	65159.1	684687	17.52	-2.08	3.5481
Thymine_185.05685_0.892		7.49033e+06	4.85309e+06	3.37334e+06	22.24	4.43821e+06	5.22773e+06	4.87109e+06	22.21	-0.03	1.09458	N-(3-hydroxy-decanoyl)-homoserine lactone_272.18579_10.038		331128	389072	2.96422e+07	20.58	3.95454e+07	1.98967e+07	3.51909e+07	24.85	4.27	8.53628
1-(Diisobutylamino)-3-(1,3-dimethyl-2,6-dioxo-2,3,6,7-tetrahydro-1H-purin-8-yl)-2-propanyl benzoate_468.26068_9.746		64981.8	1.2638e+06	20662.9	16.86	17310.2	10830.3	64159.8	14.48	-2.38	3.51423	7-ketodeoxycholic acid_407.2795_9.109		1.29824e+06	885952	872305	19.93	686865	586273	831663	19.41	-0.52	11.0439
5-Hydroxy-DL-tryptophan_219.07767_1.331		1.25133e+06	573655	1.30787e+06	19.9	2.91652e+06	1.08778e+06	1.23006e+06	20.59	0.69	3.21585	felbamate_239.10269_1.218		8.46578e+06	5.59659e+06	8.60974e+06	22.82	8.62932e+06	8.97557e+06	2.38837e+07	23.55	0.73	4.24056
(+)-castanospermine_188.09295_1.32		3.40626e+06	2.39473e+06	2.47245e+06	21.38	988970	2.76719e+06	2.62274e+06	20.88	-0.5	2.60221	Boc-Asn-Oh_233.11315_1.188		1.21679e+07	3.17187e+07	1.41448e+07	24.07	4.2079e+07	3.78805e+07	3.8759e+07	25.24	1.17	18.5498
Marimastat_330.20367_5.402		161777	98070	1.11496e+06	17.99	329772	278438	2.74347e+06	19.27	1.28	2.25039	5-Hydroxy-DL-tryptophan_221.09204_1.284		1.0019e+07	5.72859e+06	9.47516e+06	22.96	1.46528e+07	6.74465e+06	1.18702e+07	23.33	0.37	2.32721
[Similar to: NP-008095; ΔMass: 45.9692 Da]_297.13447_7.93		338194	142282	1.26945e+06	18.59	2.41039e+06	1.4676e+06	1.62373e+06	20.77	2.18	12.2635	Vazabitide A_272.16055_1.956		4.72415e+07	3.13991e+07	2.67333e+07	25.02	2.75937e+07	2.68558e+07	2.33995e+07	24.63	-0.39	5.14811
Carbofuran_220.09799_7.363		1.1866e+06	682724	1.14302e+06	19.89	558742	385389	1.18311e+06	19.27	-0.62	3.1717	Caryophyllose_297.15456_4.911		1.87627e+07	1.43316e+07	1.3546e+07	23.88	1.10657e+07	1.11249e+07	14561029	23.53	-0.35	6.42335
Traumatic Acid_227.12898_9.176		1.28837e+06	1.66702e+06	604309	20.06	2.15782e+06	2.36418e+06	496964	20.38	0.32	1.38036	Epiguanine_166.07227_1.04		1.25473e+07	1.28931e+07	1.04013e+07	23.5	9.12641e+06	7.28358e+06	6.55245e+06	22.85	-0.65	52.0346
1-(4-Hydroxy-3,5-dimethoxyphenyl)-1,2,3-propanetriol_243.08749_6.562		45987.3	143500	1.32798e+06	17.65	2.23145e+06	1.49723e+06	1.69839e+06	20.77	3.12	10.4308	[Similar to: Taurocholic acid; ΔMass: -179.0461 Da]_337.25289_11.072		1.48277e+06	1.42246e+07	4.48608e+06	22.12	268634	1.79181e+06	3.33898e+06	20.16	-1.96	4.06539
1-(beta-D-ribofuranosyl)thymine_257.07811_1.15		929010	388274	906039	19.39	1.4567e+06	1.82156e+06	745962	20.26	0.87	4.97624	2-Propanol, 1-[(2-aminoethyl)amino]-_119.11777_0.845		2.24347e+06	364002	364954	19.35	4.90381e+06	357811	383504	19.74	0.39	1.23568
Triethyl citrate_275.11381_4.373		20870	103878	2.52289e+06	17.43	1.38961e+06	1.40341e+06	1.50057e+06	20.45	3.02	4.72815	Arg-pro_272.17177_0.911		2.7569e+07	9.81436e+06	3.45593e+07	24.33	2.06237e+07	1.82916e+07	3.26724e+07	24.46	0.13	1.19128
[Similar to: Remifentanil acid; ΔMass: 1.9431 Da]_363.12_5.731		811091	3.81426e+06	776348	20.35	1.05596e+06	666117	806850	19.66	-0.69	2.36007	Homoanserine_255.14519_0.9		7.15808e+06	2.46637e+06	1.2105e+07	22.51	6.27374e+06	7.07454e+06	4.70374e+06	22.5	-0.01	1.01223
2,6-Dideoxy-3-O-methyl-L-arabino-hexopyranose_161.08204_1.706		866168	240673	3.21267e+06	19.74	1.75337e+06	1.66375e+06	1.21881e+06	20.54	0.8	1.98855	Levetiracetam_171.11277_1.425		1.26693e+07	8.52089e+06	1.70134e+07	23.55	1.11726e+07	1.73677e+07	2.03012e+07	23.91	0.36	2.51767
Diatretol_305.15086_7.023		612093	1.91001e+06	535792	19.71	457504	522034	896570	19.19	-0.52	2.11125	Butyryl-L-homoserine lactone_213.12337_1.106		4.64871e+07	8.36363e+06	8.10922e+07	24.91	9.12714e+07	8.25105e+07	69779480	26.27	1.36	4.08839
Methyl 9-oxononanoate_245.13954_7.451		576270	1.65561e+06	944347	19.88	1.31249e+06	1.11344e+06	459134	19.74	-0.14	1.19532	Piperidine_86.09632_5.644		5.25271e+07	1.83501e+08	3.75461e+07	26.09	2.86091e+07	4.55101e+07	9.83144e+07	25.59	-0.5	1.67809
D-(−)-Erythrose_119.03502_19.754		3.23282e+06	2.54465e+06	1.20156e+06	21.03	7.69143e+06	3.58885e+06	3.12531e+06	22.08	1.05	6.57004	dCt_309.20625_12.687		1.34424e+06	1.11122e+07	1.24086e+06	21.34	1.02676e+07	1.48199e+07	984553	22.34	1	1.76986
ascr#9_247.11882_6.25		282215	1.88069e+06	297597	19.04	1.68995e+06	1.372e+06	248638	19.67	0.63	1.54802	DL-Citrulline_176.10287_1.104		1.53745e+07	3.0495e+07	2.2612e+07	24.39	1.59167e+07	3.48148e+06	4.90641e+06	22.63	-1.76	13.9954
Aminolevulinic acid_130.05103_1.128		4.61384e+06	4.35822e+06	2.2941e+06	21.77	6.66101e+06	6.75147e+06	6.80502e+06	22.68	0.91	20.793	Aceglutamide_189.08692_1.022		5.42356e+07	2.13183e+07	1.40758e+07	24.6	1.47256e+07	1.85007e+07	2.67057e+07	24.21	-0.39	1.75253
Leu-Gly-Pro_284.16173_3.736		6.87909e+06	4.08758e+06	5.07257e+06	22.32	6.1353e+06	3.88675e+06	5.49149e+06	22.28	-0.04	1.11633	Levetiracetam_171.11282_3.611		3.69062e+07	3.21197e+07	3.34806e+07	25.02	2.23077e+07	3.26279e+07	3.4109e+07	24.8	-0.22	3.0369
n-Butyl lactate_145.08707_5.241		730128	561577	3.82176e+06	20.15	4.35775e+06	3.04316e+06	3.08687e+06	21.72	1.57	6.66618	3-Methylcyclopentene_83.08543_6.872		633607	582518	1.43527e+07	20.73	2.05814e+07	1.18572e+07	2.27375e+07	24.08	3.35	10.31
Eglumetad_184.06162_2.179		1.23092e+06	1.18974e+06	1.15606e+06	20.18	733552	664034	1.06073e+06	19.61	-0.57	19.5607	Marimastat_332.21826_5.377		2.52055e+06	621346	7.2332e+06	21.1	1.93884e+06	2.83387e+06	2.36296e+07	22.27	1.17	2.06827
7-Sulfocholic acid_487.23762_9.18		27887.1	2.16952e+06	24568.5	16.8	941795	123911	775566	18.78	1.98	2.26023	Piperidine_86.09633_5.097		3.13196e+07	4.49588e+07	5.79566e+07	25.37	3.6284e+07	3.41461e+07	4.01524e+07	25.13	-0.24	2.36842
(+/-)-2-Hydroxyglutaric acid_129.01941_4.672		508896	354849	3.84672e+06	19.76	3.03394e+06	2.24777e+06	1.79371e+06	21.14	1.38	3.63311	3-(2,4-Cyclopentadien-1-ylidene)-5alpha-androstan-17beta-ol_339.26844_10.58		2.85316e+06	1.13883e+07	695494	21.43	1.94949e+06	149970	1.50741e+06	19.54	-1.89	3.15979
Vorinostat_263.14023_5.358		218947	116770	521030	17.85	1.10741e+06	489387	1.76689e+06	19.91	2.06	14.7464	(−)-nabilone_373.27394_9.511		1.38013e+07	2.05078e+07	7.51177e+06	23.62	1.27078e+07	5.69643e+06	7.81819e+06	22.98	-0.64	3.29667
anthramycin_314.11479_6.454		732474	88723.8	746787	18.48	732604	1.81567e+06	482922	19.72	1.24	2.88552	D-PANTOTHENIC ACID_220.11786_1.731		2.16319e+07	1.47324e+07	2.21256e+07	24.19	1.36448e+07	2.56603e+07	2.35787e+07	24.27	0.08	1.19626
Vorinostat_263.14022_4.847		408878	214812	682052	18.58	1.32643e+06	495424	915226	19.69	1.11	6.41169	Troxipide_295.16535_5.191		1.42755e+06	837857	6.74305e+06	20.94	4.15587e+06	4.99563e+06	1.5115e+07	22.7	1.76	5.66922
3-[hydroxy(oxido)phosphoranyl]pyruvic acid_150.98008_19.767		74544.2	57137.7	63252.1	15.98	3.76077e+06	4.46143e+06	56295.4	19.9	3.92	7.67772	deoxyhypusine_200.17573_0.869		6.2385e+06	6.05525e+06	8.82709e+06	22.73	3.32588e+06	9.42024e+06	7.50549e+06	22.56	-0.17	1.33663
L-gamma-Glutamyl-L-valine_245.11439_1.952		1.55523e+06	4.63657e+06	1.81973e+06	21.17	2.83077e+06	3.67633e+06	2.91378e+06	21.57	0.4	2.12443	Levetiracetam_171.11283_3.056		2.78718e+07	2.3093e+07	2.80324e+07	24.64	1.63163e+07	1.7635e+07	2.72241e+07	24.24	-0.4	5.54739
Traumatic Acid_227.12898_6.096		278332	740189	585305	18.91	1.39543e+06	1.50583e+06	1.77591e+06	20.56	1.65	51.1221	APM_217.11826_0.928		1.51437e+07	3.22491e+06	9.50024e+06	22.88	9.02364e+06	7.57412e+06	1.1695e+07	23.15	0.27	1.38473
Traumatic Acid_227.12901_5.825		341675	524750	809167	19	1.88925e+06	1.84698e+06	1.47439e+06	20.72	1.72	96.3298	Piperidine_86.09633_0.702		2.53921e+07	2.64848e+06	2.29338e+07	23.46	2593581	1.79932e+07	1.7443e+07	23.15	-0.31	1.19332
Diethyl carbonate_117.05576_2.01		2.80214e+06	2.91295e+06	1.45028e+06	21.12	1.05452e+06	1.3669e+06	1.32754e+06	20.24	-0.88	15.3607	Leu-pro_229.1545_1.197		763483	693502	657778	19.42	1.42006e+07	741850	700328	20.89	1.47	2.74685
Malondialdehyde_71.01389_1.149		4.25263e+06	1.83278e+06	4.1946e+06	21.61	8.25828e+06	3.92402e+06	3.22275e+06	22.17	0.56	2.5817	Gly-Leu_171.11281_3.066		2.78718e+07	2.3093e+07	2.80324e+07	24.64	1.63163e+07	1.7635e+07	2.72241e+07	24.24	-0.4	5.54739
gln-trp_331.14141_2.048		520483	113511	887578	18.51	639553	283068	2.20765e+06	19.49	0.98	2.10865	(2S,8R)-2-Amino-8-hydroxydecanoic acid_204.15921_5.516		178147	1.90936e+06	127562	18.42	1.48473e+06	1.14596e+06	128011	19.2	0.78	1.50323
Propionic acid_73.02953_1.743		4.46406e+06	2.41537e+06	9.47253e+06	22.16	1.16117e+07	3.51868e+06	2.56605e+06	22.17	0.01	1.0109	Levetiracetam_171.11279_2.116		5.75417e+07	2.50372e+07	4.25521e+07	25.23	2.25722e+07	3.51482e+07	5.28783e+07	25.05	-0.18	1.36399
Emivirine_301.15583_9.583		1.43628e+06	1.25778e+06	38634.5	18.65	291948	310619	1.99726e+06	19.11	0.46	1.21313	capuride_228.17053_1.335		1.94402e+07	1.90354e+07	1.795e+07	24.16	1.08326e+07	2.2227e+07	1.98742e+07	24.01	-0.15	1.53404
1,2-Ethanediylbis(oxy-2,1-ethanediyl) diacetate_293.12436_1.647		31923.2	23428.2	1.14265e+06	16.53	2.24861e+06	1.73391e+06	1.78274e+06	20.86	4.33	13.4611	Lys-Pro_244.1656_1.365		9.56802e+06	5.48045e+06	9.57322e+06	22.92	1.03873e+06	3.3614e+06	5.72569e+06	21.37	-1.55	8.60548
DL-Nordihydroguaiaretic acid_301.14468_7.996		37285.1	218093	40997.8	16.08	74835.4	10273.6	201434	15.71	-0.37	1.22095	Methohexital_304.16583_5.752		6.98035e+06	1.19863e+07	5.52695e+06	22.88	1.51574e+07	5.90235e+06	9.83992e+06	23.19	0.31	1.72614
Pivagabine_186.11363_6.73		626836	536330	467546	19.04	499032	353234	493653	18.76	-0.28	4.23368	Kinoprene_277.21633_10.85		1.07302e+07	8.76092e+06	5.36694e+06	22.92	4.48436e+06	4.86844e+06	5.48724e+06	22.23	-0.69	11.301
Diethyl malonate_159.0664_1.839		1.95157e+06	1.01473e+06	3.10997e+06	20.81	2.94953e+06	3.10015e+06	2.94281e+06	21.51	0.7	4.87137	Val-Met_249.12668_1.73		8.15619e+06	1.0517e+07	3.23488e+06	22.64	1.51967e+07	2.36658e+06	9.83518e+06	22.75	0.11	1.09989
tert-Butyl 3-amino-1-methyl-2,3-dioxopropylcarbamate_215.10383_1.117		1.94128e+06	504450	1.47017e+06	20.11	1.48532e+06	714249	1.27526e+06	20.08	-0.03	1.03439	7alpha-Hydroxy-3-oxochol-4-en-24-oic acid_389.269_10.164		7.06489e+06	2.83311e+07	5.37114e+06	23.29	4.87179e+06	2.36801e+06	8.63936e+06	22.14	-1.15	3.5595
Troxipide_293.15089_5.202		92352.1	80448.4	579221	17.31	518054	621601	1.60132e+06	19.61	2.3	10.7596	Propamocarb_189.15971_0.769		1.3111e+07	1.24265e+07	1.0888e+07	23.53	1.30903e+07	1.08919e+07	9.80886e+06	23.41	-0.12	2.10212
[Similar to: 5-{[(1S,4S)-4-{3,5-Dimethyl-1-[4-(trifluoromethyl)phenyl]-1H-pyrazol-4-yl}-2-cyclopenten-1-yl]amino}-3,3-dimethyl-5-oxopentanoic acid; ΔMass: -303.2759 Da]_158.92508_1.539		531327	466748	244548	18.58	186114	117526	15655.4	16.09	-2.49	10.3733	leu-gly-leu_302.2076_6.261		1.00222e+07	3.43066e+06	7.62817e+06	22.61	1.89297e+06	3.27816e+06	9.27393e+06	21.88	-0.73	2.36771
8-Epideoxyloganic acid_359.13493_6.302		13917.8	17054.2	1.87317e+06	16.22	2.38649e+06	2.06285e+06	2.42297e+06	21.12	4.9	9.88582	2-decene-4,6,8-triyn-1-al_72.02788_0.855		2.1346e+07	1.41362e+07	2.62425e+07	24.25	2.30876e+07	2.21391e+07	1.4536e+07	24.22	-0.03	1.0728
D-ribosylnicotinate_254.06717_2.513		955439	1.70668e+06	1.95284e+06	20.49	376874	1.06248e+06	1.57685e+06	19.71	-0.78	3.0874	[Similar to: (2R,3R,4R,5R,6S)-2-{[(2R,3S,4S,5R,6R)-6-(benzyloxy)-3,4,5-trihydroxyoxan-2-yl]methoxy}-6-methyloxane-3,4,5-triol; ΔMass: 395.3459 Da]_406.76437_7.315		4.69629e+06	4.14958e+06	7.08452e+06	22.3	884506	2.05092e+06	1.99985e+06	20.55	-1.75	51.8941
L-(+)-Alanine_88.04039_1.828		4.43032e+06	7.12155e+06	1.08961e+07	22.74	5.94333e+06	8.06223e+06	7.35117e+06	22.75	0.01	1.02259	Methyl alpha-aspartylphenylalaninate_295.129_3.355		1.43265e+07	2.93458e+07	1.05968e+07	23.97	2.03086e+07	1.63127e+07	1.91315e+07	24.14	0.17	1.38284
(+/-)-Camphoric acid_199.09768_7.815		1.62793e+06	3.19712e+06	1.50763e+06	20.92	2.20222e+06	1.82083e+06	1.95419e+06	20.92	0	1.00138	Aminolevulinic acid_304.15039_1.099		2.16633e+07	1.60055e+07	1.35899e+07	24	1.86327e+07	1.19659e+07	2.31256e+07	24.04	0.04	1.10446
Marimastat_330.20363_6.388		603640	37586.9	880200	18.05	633866	727314	1.59085e+06	19.78	1.73	3.22292	amidinoproclavaminic acid_245.12445_1.074		1.27968e+06	800872	9.1513e+06	21.01	835368	6.68531e+06	1.83717e+07	22.16	1.15	1.86869
5-Cyanopentanamide_185.09328_1.066		1.41681e+06	593322	1.98909e+06	20.18	1.03521e+06	1.70133e+06	1.352e+06	20.35	0.17	1.28803	Creatinine_146.09243_0.89		1.00854e+07	1.44843e+07	7.19876e+06	23.28	1.04528e+07	4.26645e+06	1.36973e+07	23.02	-0.26	1.47312
ophthalmic acid_288.1203_1.288		4.4347e+06	1.8448e+06	2.9752e+06	21.47	4.18243e+06	3.34337e+06	4.21925e+06	21.89	0.42	3.05466	p-Isopropyl-α-methylstyrene_321.25781_11.785		1.24768e+07	8.10685e+06	1.59216e+07	23.48	1.8739e+07	2.17538e+07	9.69445e+06	23.91	0.43	2.50703
Eterobarb_319.13009_7.185		549894	1.2666e+06	352020	19.26	800332	413815	809123	19.3	0.04	1.05367	Oxagrelate_277.11838_3.351		1.35648e+07	2.75447e+07	1.0425e+07	23.91	20615541	1.64249e+07	1.86632e+07	24.14	0.23	1.62216
Glycyl-L-asparaginyl-D-leucine_301.15187_1.281		714604	710203	3.20891e+06	20.17	972037	1.93041e+06	4.06763e+06	20.91	0.74	2.11592	9,10-Dihydroxystearic acid_299.25827_11.163		1.6338e+06	2.93852e+06	2.96818e+06	21.21	4.00301e+06	5.23131e+06	3.26986e+06	21.96	0.75	10.5849
Pukeleimide A_277.08287_1.57		1.26652e+06	1.64739e+06	1.05298e+06	20.31	1.48284e+06	1.51572e+06	1.36495e+06	20.47	0.16	2.21221	Roxatidine_307.20186_8.809		3.97328e+06	45144.3	4.29109e+06	19.81	251237	68326.2	108938	16.91	-2.9	3.76101
n-heptanoic acid_189.11336_7.14		84580.8	1.35145e+06	61106.6	17.54	1.35802e+06	1.32801e+06	54079.1	18.81	1.27	1.7302	N,N-Bis(polyoxyethylene)oleylamine_444.40515_16.583		5.11425e+06	2.75915e+07	4.22221e+06	23	78449.7	2.15881e+06	1.2836e+07	20.3	-2.7	3.23313
4-(1,2-Dihydroxy-2-propanyl)-1-methyl-1,2-cyclohexanediol_203.12893_6.676		282860	410499	413248	18.47	221450	199629	66398.8	17.13	-1.34	12.0349	5,6-Dihydrothymidine_245.113_1.071		3.84654e+06	2.57469e+06	4.58248e+06	21.77	6.59227e+06	3.33501e+06	7.89661e+06	22.41	0.64	4.41837
2-O-ETHYL ASCORBIC ACID_185.04564_0.859		1.7338e+06	854776	1.16739e+06	20.2	1.26309e+06	1.0058e+06	1.20167e+06	20.14	-0.06	1.16781	Diethylene glycol_107.07016_13.186		1.3257e+07	1.25877e+07	1.99526e+06	22.72	1.58664e+06	1.75468e+06	2.08669e+06	20.78	-1.94	10.1969
prinoxodan_257.10317_6.056		86048.7	351848	1.35344e+06	18.4	1.57712e+06	839703	1.6768e+06	20.32	1.92	5.48613	4-(2-Aminophenyl)-2,4-dioxobutanoic acid_208.0604_4.644		1.86564e+06	9.78457e+06	3.67943e+06	21.95	166696	9.79699e+06	2.28362e+07	21.67	-0.28	1.10137
Dinemasone A_229.10821_5.957		104832	119743	1.29269e+06	17.95	1.89778e+06	1.48494e+06	1.18846e+06	20.51	2.56	10.179	Vazabitide B_290.17116_1.936		1.009e+07	3.54648e+06	1.087e+07	22.8	5.83982e+06	7.35368e+06	9.75905e+06	22.84	0.04	1.05005
DIHEPTYL ADIPATE_341.26973_13.456		1.1101e+06	1.25327e+06	24119.5	18.3	50259.6	10856.9	45495.1	14.83	-3.47	6.30831	5-Methylcytosine_158.09236_1.276		5.53098e+06	1.45094e+07	9.12303e+06	23.1	3.08156e+06	2.93413e+06	1.25958e+07	22.21	-0.89	3.07922
9-Oxononanoic acid_171.10278_5.725		623595	325515	1.39933e+06	19.33	3.86141e+06	2.68006e+06	2.12962e+06	21.42	2.09	29.8427	1,3,5-Heptatriene_189.16374_11.78		9.82176e+06	9.32771e+06	1.34112e+07	23.35	7.64101e+06	1.7981e+07	8.57798e+06	23.33	-0.02	1.03706
N-Acetyl-L-aspartic acid_174.04088_1.24		486508	2.01611e+06	2.21312e+06	20.3	369375	929779	560104	19.14	-1.16	4.51769	Cladosin L_288.19193_5.416		1.47768e+07	6.14138e+06	8.95247e+06	23.15	2.00652e+06	8.96208e+06	1.5946e+07	22.65	-0.5	1.58546
[Similar to: NP-018458; ΔMass: -178.0780 Da]_383.1925_5.876		1.21805e+06	1.00493e+06	991798	20.02	902931	1.06773e+06	1.31183e+06	20.04	0.02	1.08751	spermidine_146.16521_0.955		7.9636e+06	1.02203e+07	7.16273e+06	22.99	3.08916e+06	7.40055e+06	9.66259e+06	22.53	-0.46	2.38172
meprobamate_217.11938_0.9		1.82699e+06	513457	1.33829e+06	20.04	1.60982e+06	1.10676e+06	1.99096e+06	20.54	0.5	2.19888	3-Acetamidopiperidine_143.11792_1.048		1.4601e+07	5.19823e+06	1.45491e+07	23.3	6.05135e+06	5.59103e+06	1.60648e+07	22.96	-0.34	1.53771
Boc-Asn-Oh_231.09876_1.283		3.3866e+06	3.1257e+06	1.485e+06	21.26	1.60027e+06	3.76849e+06	2.23201e+06	21.18	-0.08	1.11944	ile-gly-ile_302.20754_4.566		6.46317e+06	4.76026e+06	5.87011e+06	22.43	6.47526e+06	4.68196e+06	1.58204e+07	22.9	0.47	2.30217
pro-gln_288.12033_1.27		4.4347e+06	1.8448e+06	2.9752e+06	21.47	4.18243e+06	3.34337e+06	4.21925e+06	21.89	0.42	3.05466	FF-MAS_411.36247_15.176		891363	1.07132e+06	1.04702e+07	21.04	42036.9	37719.7	1.44056e+06	17.01	-4.03	8.10885
felbamate_237.08823_1.277		923745	597828	1.26561e+06	19.76	887478	1.88445e+06	2.23053e+06	20.56	0.8	5.1796	RG1300000_299.25823_11.409		2.72591e+06	4.41513e+06	5.33566e+06	21.93	1.89146e+06	1.737e+06	1.65671e+06	20.75	-1.18	64.0574
1,3-Propane sultone_120.99649_13.621		469799	1.03317e+06	11856.6	17.45	11103.3	9303.9	8760.01	13.24	-4.21	9.84049	Leu-Gly-Pro_286.17621_4.9		1.01531e+07	2.45965e+07	1.5204e+07	23.9	2.48466e+07	2.80429e+07	2.02782e+07	24.53	0.63	5.45039
Allyl mercaptan_73.01177_1.446		22557.9	15341.6	502733	15.77	21836.9	29555.4	21923.6	14.56	-1.21	2.02959	apronalide_185.12835_1.454		4.04731e+06	7.34069e+06	1.6011e+06	21.79	1.86335e+06	2.05196e+06	2.62929e+06	21.04	-0.75	3.14283
[Similar to: 3-hydroxy-2-{[(2E)-3-(4-hydroxyphenyl)prop-2-enoyl]oxy}-3-(methoxycarbonyl)pentanedioic acid; ΔMass: -164.0108 Da]_203.05626_1.965		590514	319745	313897	18.57	562300	354474	305575	18.59	0.02	1.02523	pregnenolone acetate_359.25842_10.233		601187	9.34986e+06	476965	20.41	316998	460503	492077	18.67	-1.74	3.57764
Maleic acid_175.02485_5.975		31211.4	29115.4	1.48762e+06	16.75	2.66725e+06	1.8951e+06	1.58278e+06	20.93	4.18	10.9407	N-(tert-Butoxycarbonyl)-L-leucine_232.1543_6.119		247325	1.03743e+07	448237	20	6.0451e+06	2.95053e+06	196996	20.54	0.54	1.21507
Mutanamide_369.23962_8.724		970285	912578	1.36104e+06	20.02	1.92936e+06	1.69048e+06	1.3775e+06	20.65	0.63	19.891	N(6)-[(indol-3-yl)acetyl]-L-lysine_304.1657_5.822		5.77226e+06	1.19863e+07	5.52695e+06	22.79	1.5277e+07	5.90235e+06	9.83992e+06	23.2	0.41	2.02855
[Similar to: jwh-018-d11; ΔMass: -177.2227 Da]_174.01702_5.612		10265.7	9152.48	1.20965e+06	15.56	1.19028e+06	1.0685e+06	1.51808e+06	20.25	4.69	8.74455	Leu-pro_246.18124_0.888		9.00373e+06	4.84616e+06	2.52331e+07	23.3	4.73897e+06	2.68101e+07	3.78641e+07	24.01	0.71	1.74344
Dambonitol_207.08751_1.733		2.44679e+06	1.49797e+06	1.81619e+06	20.84	1.26609e+06	1.55719e+06	1.94395e+06	20.58	-0.26	2.59601	Artemether_299.18544_10.047		459311	980073	1.06266e+07	20.68	2.97077e+07	1.67243e+07	2.01939e+07	24.36	3.68	17.5815
13(S)-HpOTrE_309.20723_10.787		3.03976e+06	736186	2.30419e+06	20.72	1.12059e+06	2.14596e+06	2.78173e+06	20.85	0.13	1.14483	ascr#7_257.13841_6.874		563732	518277	6.13702e+06	20.21	1.43327e+07	7.38173e+06	8.87181e+06	23.22	3.01	15.0125
3-Methylbutanoic acid_161.08203_1.653		58243.6	96625.2	969116	17.43	1.75337e+06	1.66375e+06	754688	20.31	2.88	10.8492	1-(2-Hydroxyethyl)imidazole_113.07085_0.916		903137	2.85515e+06	475368	20.03	321076	2.46795e+06	3.47896e+06	20.42	0.39	1.27985
Azelaic acid, bis(2-hydroxyethyl) ester_275.15016_6.482		253971	361901	961287	18.76	780190	556560	1.62586e+06	19.76	1	4.08595	leu-gln_260.16049_1.985		1.22436e+07	1.79996e+06	1.3275e+07	22.66	4.06712e+06	1.15336e+07	2.22133e+07	23.27	0.61	1.58121
(E)-p-coumaric acid_163.04013_6.043		786544	150323	193459	18.11	399291	247137	167227	17.96	-0.15	1.16469	pro-gln_276.15549_0.735		4.58431e+06	6.84259e+06	2.17755e+06	21.96	4.11049e+06	3.91905e+06	3.80116e+06	21.91	-0.05	1.08823
bendiocarb_222.07724_1.65		1.27595e+06	849563	865868	19.9	546937	751338	724195	19.35	-0.55	12.1105	Leu-Gly-Pro_286.1763_5.305		2.0562e+07	1.16594e+07	1.18658e+07	23.76	1.25935e+07	9.50851e+06	1.3171e+07	23.47	-0.29	2.45764
[Similar to: NP-015631; ΔMass: -53.0734 Da]_260.07117_1.346		1.11703e+06	186819	1.05936e+06	19.21	389648	320454	997339	18.93	-0.28	1.26008	agmatine_131.12907_0.869		2.45617e+06	450789	333238	19.45	349531	366341	7.36307e+06	19.9	0.45	1.24255
2-O-ETHYL ASCORBIC ACID_203.0562_1.645		881971	1.118e+06	1.21174e+06	20.02	1.63319e+06	1.33377e+06	1.15978e+06	20.38	0.36	6.93784	lys-leu_260.19677_0.917		5.62589e+06	1.82562e+06	2.45927e+06	21.48	451398	2.89493e+06	7.96907e+06	21.06	-0.42	1.31463
Itaconic acid_129.01942_4.366		462599	356146	3.81522e+06	19.71	2.54801e+06	2.41175e+06	2.68845e+06	21.28	1.57	4.53319	3beta,17beta-Diacetoxy-5alpha-androstane_377.26891_10.233		394745	8.49115e+06	183876	19.7	139908	267833	306599	17.78	-1.92	3.03742
1-(alpha-D-Glucopyranosyluronosyl)-3-[(2S)-1-methyl-5-oxo-2-pyrrolidinyl]pyridinium_351.11996_5.877		950753	914908	964349	19.85	1.16394e+06	1.26083e+06	1.21984e+06	20.21	0.36	1193.32	[Similar to: Tetranor-12(S)-HETE; ΔMass: -78.0317 Da]_189.16377_11.778		9.82176e+06	9.32771e+06	1.34112e+07	23.35	7.64101e+06	1.7981e+07	8.57798e+06	23.33	-0.02	1.03706
Oxybis(methyl-2,1-ethanediyl) diacrylate_241.10824_8.08		334419	1.20392e+06	324667	18.95	1.26507e+06	1.27637e+06	309133	19.6	0.65	1.91115	Pyridoxal_168.06543_1.245		1.21626e+07	3.69582e+06	2.62193e+06	22.23	376044	343812	6.06397e+06	19.81	-2.42	5.34954
[Similar to: N-{5-(tert-Butyl)-2-[(2-morpholinoacetyl)amino]phenyl}-2,2,2-trichloroacetamide; ΔMass: -117.9143 Da]_316.16679_6.645		215258	685574	891349	18.96	745357	444148	1.13956e+06	19.46	0.5	1.87833	Brasilicardin C aglycone_424.30614_10.154		5.41532e+06	1.442e+07	3.97779e+06	22.69	3.4394e+06	3.23472e+06	5.14469e+06	21.88	-0.81	4.07342
4-Hydroxy-5-methylfuran-3(2H)-one_113.02444_0.877		2.10129e+06	1.51452e+06	975161	20.48	1.28922e+07	1.09176e+06	3.47979e+06	21.8	1.32	3.49981	Lys-Pro_244.16555_0.882		1.23842e+07	1.32064e+07	3.56262e+07	24.1	4.94254e+06	1.3142e+07	3.1147e+07	23.59	-0.51	1.64801
Indole-3-carbidol_192.06671_6.188		3.70609e+06	2.40548e+06	3.2798e+06	21.55	3.78704e+06	3.3979e+06	3.7146e+06	21.79	0.24	3.50648	Kojistatin A_373.24474_3.275		159097	71163.4	5.29167e+06	18.58	205077	3.47555e+06	1.53271e+07	21.08	2.5	2.51999
Itaconic acid_129.01941_4.659		512064	355048	3.84672e+06	19.76	3.03394e+06	2.24777e+06	1.79371e+06	21.14	1.38	3.62655	[Similar to: Peniciside; ΔMass: -464.2622 Da]_215.17935_11.963		6.77569e+06	3.64186e+06	3.18061e+06	22.03	4.7951e+06	4.59536e+06	5.00284e+06	22.19	0.16	1.52937
2'-Deoxycytidine_272.08893_0.948		597332	76713.3	885777	18.39	828588	1.10157e+06	304042	19.32	0.93	2.02313	Ala-Tyr_253.11829_1.353		9.75492e+06	8.38858e+06	7.1478e+06	23	9.44721e+06	4.60974e+06	1.51555e+07	23.05	0.05	1.09202
Methyl alpha-aspartylphenylalaninate_293.11452_4.552		941267	1.91488e+06	1.27851e+06	20.33	627943	769158	717763	19.42	-0.91	23.8039	Sorbic acid_113.05962_11.486		2.88325e+06	3.08511e+06	1.15291e+07	22.16	2.3062e+07	1.46717e+07	1.59096e+07	24.06	1.9	20.4098
[Similar to: jwh-018-d11; ΔMass: -177.2227 Da]_174.01702_5.383		9746.15	8376.14	815130	15.31	750639	696404	901759	19.57	4.26	8.28123	2,5,8,11,14-Pentaoxapentadecane_223.15398_5.788		9.24847e+06	8.84916e+06	8.87062e+06	23.1	6.82267e+06	7.50635e+06	9.11237e+06	22.89	-0.21	6.12925
EDDA_175.07254_0.792		2.2182e+06	1.08511e+06	1.7568e+06	20.62	1.67966e+06	887789	1.59712e+06	20.35	-0.27	1.81785	2-Amino-6-[(E)-(5-amino-5-carboxy-2-hydroxypentylidene)amino]-5-hydroxyhexanoic acid (non-preferred name)_347.19281_2.099		5.88951e+06	1.89843e+06	1.18526e+07	22.28	5.13334e+06	9.24349e+06	1.49939e+07	23.09	0.81	2.40775
Timonacic_132.01254_0.881		652173	491150	8.22748e+06	20.4	1.38027e+06	1.03806e+07	600713	20.97	0.57	1.3074	BZ8580500_139.08659_2.133		6.30248e+06	4.1965e+06	5.23252e+06	22.3	3.25408e+06	4.51403e+06	5.39558e+06	22.03	-0.27	2.62221
[Similar to: Sucrose; ΔMass: 45.7200 Da]_386.82893_0.757		255762	445721	207161	18.13	336171	296187	271386	18.19	0.06	1.16436	Leu-pro_229.15453_1.073		553332	492845	509385	18.98	7.7738e+06	494433	507287	20.25	1.27	2.56237
3-hydroxy-3-methyloxindole_162.05611_4.704		226013	761080	342984	18.57	19779.2	1.16365e+06	1.94985e+06	18.44	-0.13	1.0479	Asp-lys_262.13977_0.735		5.9218e+06	4.67016e+06	3.5911e+06	22.14	5.52394e+06	4.07097e+06	4.95829e+06	22.2	0.06	1.20273
Leu-Gly-Pro_284.16174_4.916		1.62393e+06	1.82364e+06	1.11686e+06	20.51	2.24786e+06	2.32708e+06	1.76603e+06	21	0.49	8.57493	Oxagrelate_277.1183_6.268		1.36786e+07	1.39911e+06	8.02415e+06	22.35	7.27002e+06	1.25273e+07	6.03166e+06	22.97	0.62	1.70024
D-ribosylnicotinate_254.06714_2.74		440193	631177	1.84955e+06	19.61	115846	381617	705325	18.26	-1.35	4.10666	1J8O1GT31U_251.1503_1.368		6.25919e+06	7.79803e+06	5.5697e+06	22.63	7.26006e+06	9.8361e+06	6.00213e+06	22.85	0.22	2.30768
Maleic acid_175.02488_5.388		11061.2	12781.5	877546	15.61	760494	700984	929751	19.59	3.98	7.89185	Surugapyrrole A_213.08694_1.289		8.3693e+06	9.28213e+06	7.98861e+06	23.02	8.5268e+06	8.57154e+06	8.93381e+06	23.05	0.03	1.3599
2,4-Dichlorophenol_160.9567_10.062		1.66036e+06	615692	467892	19.58	500657	166607	377477	18.27	-1.31	6.7553	Artemotil_295.19058_8.907		292990	288159	9.01949e+06	19.8	1.82906e+07	1.25826e+07	1.197e+07	23.74	3.94	13.0027
Acetamide_118.05103_1.018		4.41445e+06	406612	4.14072e+06	20.9	2.47378e+06	3.98338e+06	4.17572e+06	21.72	0.82	1.93706	L-gamma-Glutamyl-L-leucine_243.13397_2.391		1.5689e+07	5.49952e+07	9.62342e+06	24.27	1.65806e+07	1.73019e+07	2.16911e+07	24.13	-0.14	1.1577
Hydroxycarteolol_307.1664_7.382		303722	21942.1	1.64269e+06	17.76	111266	18617.8	31475.2	15.3	-2.46	3.59064	Pivagabine_170.11754_6.104		2.53613e+06	5.82154e+06	2.07938e+06	21.58	3.83217e+06	4.06867e+06	1.31126e+06	21.38	-0.2	1.2601
Brassylic acid_243.16023_10.214		729544	728196	322532	19.08	512012	532753	349192	18.8	-0.28	1.80542	Desthiobiotin_215.13901_2.027		2.35694e+07	9.80936e+06	3.17867e+07	24.21	1.4159e+07	5.02809e+06	2.20997e+07	23.47	-0.74	2.42152
2-Phenylethyl D-glucopyranoside_283.11885_7.863		629622	1.26167e+06	588641	19.57	709064	627112	508311	19.22	-0.35	2.45139	7alpha-Hydroxy-3-oxochol-4-en-24-oic acid_371.25836_10.36		7.02488e+06	1.82872e+07	9.7777e+06	23.36	8.45189e+06	1.11376e+07	5.36476e+06	22.92	-0.44	2.28765
pentobarbital_225.12453_6.821		641771	1.60939e+06	407717	19.52	1.38359e+06	1.20074e+06	438680	19.78	0.26	1.32824	9-Oxononanoic acid_173.11721_9.382		1.39077e+06	1.41557e+07	303125	20.79	9.18983e+06	8.38247e+06	946053	21.99	1.2	1.7609
L-gamma-Glutamyl-L-leucine_259.13004_3.6		1.94604e+06	2.59297e+06	2.40543e+06	21.13	752292	2.13595e+06	1.27987e+06	20.28	-0.85	7.58075	Not named_340.1742_2.707		299686	180218	7.39441e+06	19.49	1.08364e+07	8.60775e+06	1.41933e+07	23.39	3.9	12.1411
Ethanal tetramer_175.09766_6.722		117764	1.31276e+06	131828	18.06	1.40587e+06	1.4346e+06	77867.8	19.04	0.98	1.62848	2-Amino-6-[(E)-(5-amino-5-carboxy-2-hydroxypentylidene)amino]-5-hydroxyhexanoic acid (non-preferred name)_306.1663_1.315		8.16999e+06	4.68642e+06	5.75226e+06	22.53	5.53659e+06	5.62622e+06	10263338	22.71	0.18	1.5204
Marimastat_330.20361_6.581		27532.7	22551.2	8654.45	14.1	123098	782301	1.27307e+06	18.92	4.82	73.0834	Leucyltryptophan_318.18133_6.425		2.5575e+06	8.59254e+06	3.11166e+06	21.96	8.53259e+06	779630	3.87886e+06	21.49	-0.47	1.41893
[Similar to: (9R,10R)-10-hydroxy-8,8-dimethyl-9-{[(2S,3R,4S,5S,6R)-3,4,5-trihydroxy-6-(hydroxymethyl)oxan-2-yl]oxy}-2H,8H,9H,10H-pyrano[2,3-h]chromen-2-one; ΔMass: -89.0528 Da]_334.0769_1.194		294907	56672.9	351476	17.46	53775.5	1.14892e+06	93541.9	17.45	-0.01	1.00369	diacetyl trimer_259.11766_4.641		219898	184771	1.53037e+07	19.7	1.28389e+07	1.00227e+07	1.20438e+07	23.46	3.76	6.86116
Ala-Tyr_251.10385_1.414		932416	726210	836282	19.66	1.12197e+06	653460	1.3274e+06	19.92	0.26	2.13376	Carbamic acid_62.02386_0.697		2.36226e+06	2.36402e+06	2.58152e+06	21.21	5.04057e+06	4.51863e+06	1.41922e+06	21.6	0.39	1.83778
MFCD09953737_230.10347_6.104		1.78098e+06	1.23049e+06	787306	20.19	1.28398e+06	1.05949e+06	578065	19.82	-0.37	2.08179	Pregabalin_160.1332_6.301		304686	1.11425e+07	219200	19.79	5.98429e+06	3.63254e+06	224646	20.69	0.9	1.39185
Dinemasone A_229.10821_7.009		458085	1.067e+06	481379	19.24	1.50767e+06	1.08812e+06	486664	19.82	0.58	2.49548	Methionylleucine_263.14252_4.842		177317	155682	698936	18.03	390848	190393	2.74142e+06	19.17	1.14	2.24368
MA4000000_112.04045_0.909		5.76776e+06	2.75841e+06	4.17501e+06	21.95	3.92573e+06	667918	1.021e+06	20.41	-1.54	7.34538	L-(-)-Threonine_120.06541_0.78		3.597e+06	474543	4.92144e+06	20.96	3.97682e+06	3.94917e+06	3.32037e+06	21.83	0.87	2.20055
[Similar to: Valganciclovir; ΔMass: -168.1356 Da]_185.02229_0.855		3.37468e+06	1.51983e+06	3.63413e+06	21.34	3.66816e+06	2.50999e+06	2.08017e+06	21.35	0.01	1.02131	Imazapyr_262.1186_4.951		129068	3.15325e+06	106907	18.42	1.23064e+07	9.64709e+06	6.82305e+06	23.15	4.73	23.8056
Biotin l-Sulfoxide_259.0759_3.091		1.66212e+06	248060	964922	19.49	773244	1.52007e+06	666949	19.81	0.32	1.3628	Cassaidine_408.3111_9.526		1.57904e+06	7.12968e+06	1.18017e+06	21.18	1.70389e+06	592495	878135	19.87	-1.31	4.35736
Zizybeoside I_431.15618_6.609		9636.21	9037.26	996181	15.43	685559	826566	1.22273e+06	19.76	4.33	7.78816	L-(+)-Aspartic acid_134.04475_0.765		1.53095e+06	1.18734e+06	3.64709e+06	20.84	1.22083e+06	3.25652e+06	4.02455e+06	21.26	0.42	1.69831
3-Hydroxynonanoic acid_173.11835_8.447		1.27112e+06	1.22386e+06	652685	19.94	1.6304e+06	1.5977e+06	664974	20.2	0.26	1.5331	VS1150000_297.24249_12.491		2.11739e+07	2.5857e+07	1.66001e+07	24.31	1.90591e+07	1.45397e+07	1.5329e+07	23.95	-0.36	5.81676
Leu-Gly-Pro_284.16174_5.301		2.0055e+06	949356	1.30371e+06	20.37	1.07673e+06	970923	1.41472e+06	20.12	-0.25	1.92864	Glycylglutamine_102.55255_19.425		4.26819e+06	4.41254e+06	376814	20.87	1.02056e+07	1.26581e+07	4.56716e+06	23	2.13	6.01573
Vazabitide A_270.14604_1.983		3.58621e+06	1.71884e+06	685959	20.62	1.82737e+06	1.49036e+06	2.38485e+06	20.83	0.21	1.26916	5'-S-Methyl-5'-thioinosine_299.08154_6.506		288674	1.85746e+06	271380	19	250647	347135	286762	18.16	-0.84	2.44423
etifenin_321.14574_6.583		449862	1.22094e+06	383039	19.18	286925	292890	600476	18.5	-0.68	2.96945	Bis(2-ethylhexyl) phthalate_391.28457_9.547		1.91353e+06	629165	751375	19.88	1.10592e+06	627084	197506	18.98	-0.9	2.75655
Valyl-4-hydroxyproline_229.1195_1.538		49806.4	264511	70291.4	16.57	175873	1.35877e+06	148483	18.33	1.76	4.21807	[Similar to: Methionine; ΔMass: -40.0498 Da]_110.00853_0.853		1.39535e+07	8.84411e+06	1.52914e+07	23.56	1.1688e+07	1.18905e+07	8.01366e+06	23.31	-0.25	2.19742
Itaconic acid_129.01941_1.334		2.26074e+06	724662	2.50537e+06	20.61	2.48015e+06	2.52464e+06	2.21623e+06	21.2	0.59	2.72486	(3S)-3-{(Z)-[(3S)-3-{(Z)-[(3R)-3-Amino-1-hydroxy-4-methylpentylidene]amino}-1-hydroxybutylidene]amino}-5-methylhexanoic acid_344.25458_6.659		2.64922e+06	683611	1.01871e+07	21.33	1.60492e+06	3.70727e+06	2.05391e+07	22.24	0.91	1.69048
2-Hydroxy-4-(methylthio)butanoic acid_149.02782_2.552		540365	217256	399383	18.46	890779	394149	303622	18.86	0.4	1.8164	oxazolidinone_120.06543_0.781		3.597e+06	474543	4.92144e+06	20.96	3.97682e+06	3.94917e+06	3.32037e+06	21.83	0.87	2.20055
Etoglucid_261.13442_7.082		388848	1.0913e+06	303597	18.95	701394	684730	99079.6	18.47	-0.48	1.46231	4-{(Z)-[(4E,7Z,16Z,19Z)-1-Hydroxy-4,7,10,13,16,19-docosahexaen-1-ylidene]amino}butanoic acid_414.3006_10.561		5.08339e+06	1.81475e+06	2.93347e+06	21.52	8.74725e+06	2.33594e+06	4.96463e+06	22.15	0.63	2.41096
Cinnamic acid_147.04521_2.269		2.41553e+06	1.44322e+06	3.22207e+06	21.09	97825.4	764342	1.03748e+06	18.7	-2.39	10.0047	Troxipide_295.16533_2.883		4.62359e+06	361706	9.66961e+06	21.27	1.38496e+07	4.65093e+06	1.56157e+07	23.26	1.99	3.75084
N~6~-(5-Oxo-D-isoleucyl)-L-lysine_272.16176_1.876		427403	107859	272562	17.83	41091.5	127789	409538	16.98	-0.85	2.03488	Methyl alpha-aspartylphenylalaninate_277.11832_3.557		7.09429e+06	1.00519e+07	5.16006e+06	22.77	2.23965e+07	1.28587e+07	1.03496e+07	23.78	1.01	12.3993
1,2-Ethanediylbis(oxy-2,1-ethanediyl) diacetate_233.10315_5.518		1.05385e+06	1.18382e+06	736674	19.89	1.21244e+06	1.00288e+06	643528	19.81	-0.08	1.20301	Marimastat_332.21817_6.397		3.56668e+06	313311	5.0151e+06	20.76	3.45944e+06	6.8388e+06	8.42537e+06	22.48	1.72	3.80996
Nitrendipine_359.12504_7.218		557252	534162	453033	18.97	848680	580538	876629	19.53	0.56	17.4871	Methyldopa_229.11823_1.617		2.65491e+07	2.47828e+07	1.90881e+07	24.47	1.25746e+07	8.01922e+06	3.18489e+07	23.81	-0.66	2.956
Dinemasone A_229.10817_5.817		68585	55233.7	458028	16.87	733165	602505	610238	19.3	2.43	14.8494	Levetiracetam_171.11278_4.865		2.17284e+07	5.18727e+06	2.74472e+07	23.8	3.78925e+07	9.17605e+06	1.32414e+07	23.99	0.19	1.17191
Tetraacetylethylenediamine_227.10388_3.488		1.44475e+06	983151	615995	19.87	973184	1.0187e+06	528651	19.62	-0.25	1.59577	Estrane_247.24208_14.104		2.32495e+06	3.25673e+06	3.34247e+06	21.49	2.46782e+06	1.13904e+06	2.83491e+06	20.93	-0.56	3.60171
N(6)-[(indol-3-yl)acetyl]-L-lysine_302.15115_5.781		424292	1.26678e+06	457654	19.26	969493	416198	726855	19.34	0.08	1.11306	Val-Met_249.12682_2.023		179204	1.43728e+06	3.12111e+06	19.83	2.53184e+06	1.01958e+06	1.11039e+07	21.55	1.72	2.94051
[Similar to: Sucrose; ΔMass: 45.7091 Da]_386.818_0.807		364668	646874	255898	18.58	640992	451709	416033	18.91	0.33	2.0544	ionene_175.1481_11.779		7.56231e+06	5.10103e+06	9.47908e+06	22.77	1.02316e+07	1.13347e+07	6.19446e+06	23.09	0.32	2.29586
2-Phenylaminoadenosine_357.13052_1.544		35359.4	19590.4	120563	15.42	31591	902510	25429.8	16.46	1.04	1.6618	D-Lysine lactam_129.10225_0.731		6.16061e+06	4.63579e+06	5.17608e+06	22.33	3.86292e+06	4.35722e+06	5.64113e+06	22.12	-0.21	2.8707
N~2~-Acetyl-L-ornithine_173.09323_5.309		1.46468e+06	1.10435e+06	1.20322e+06	20.25	1.22901e+06	1.23932e+06	1.12138e+06	20.19	-0.06	1.53304	Kinoprene_277.21615_9.371		3.6556e+06	1.73869e+07	2.99196e+06	22.46	1.3693e+07	1.32381e+07	3.17922e+06	22.99	0.53	1.55828
3b-Hydroxy-5-cholenoic acid_373.27495_14.791		109630	593915	26827.1	16.88	6713.35	5261.62	129452	14.02	-2.86	4.54572	hexobarbital_237.1234_3.179		1.93943e+06	746230	836583	20.02	2.23795e+06	2.89282e+06	3.70345e+06	21.46	1.44	24.4547
isopropylmalic acid_175.0613_1.433		503809	1.09475e+06	1.99219e+06	19.98	2.14139e+06	938320	713059	20.1	0.12	1.14612	Pent-1-ene_88.11193_1.663		1.24387e+06	1.36339e+06	940403	20.16	248272	567702	886575	18.93	-1.23	10.5623
Histidylphenylalanine_361.15054_6.127		17445.1	28456	451882	15.89	777322	939284	992319	19.78	3.89	17.5756	gamma-glutamyltyramine_267.13407_3.181		394026	104748	2.85694e+06	18.9	281659	2.15893e+06	6.48483e+06	20.59	1.69	2.3338
Itaconic acid_129.0194_5.196		721015	535812	1.75557e+06	19.74	4.57292e+06	1.48407e+06	1.5424e+06	21.06	1.32	6.66556	(2S)-4-Methyl-2-({[(3S,4S,5R)-2,3,4-trihydroxy-5-(hydroxymethyl)tetrahydro-2-furanyl]methyl}amino)pentanoic acid (non-preferred name)_294.15497_4.667		112546	94567.9	7.60515e+06	18.72	5.08571e+06	3.37235e+06	4.5194e+06	22.02	3.3	5.34365
p-Cresylsulfate_187.00712_5.919		147062	428782	42802.3	17.09	1.81362e+06	30433.2	15555.2	16.54	-0.55	1.21031	8-amino-[1,4]diazonane-2,5-dione_194.08993_0.923		5.73025e+06	4.26248e+06	5.23892e+06	22.26	2.87488e+06	3.7554e+06	4.04382e+06	21.75	-0.51	17.3964
Oglufanide_332.12538_5.106		378561	1.20548e+06	263768	18.91	1.03502e+06	476098	350268	19.09	0.18	1.18944	L-gamma-Glutamyl-L-leucine_261.14453_3.543		1.21667e+07	1.40527e+07	1.70929e+07	23.77	7.65999e+06	1.34535e+07	8.28909e+06	23.18	-0.59	8.93328
4-(1,2-Dihydroxy-2-propanyl)-1-methyl-1,2-cyclohexanediol_203.12893_5.52		56076.5	9485.63	1.59849e+06	16.53	1.65507e+06	1.21547e+06	958257	20.25	3.72	6.11303	MFCD00036904_496.34013_13.034		108363	746402	125792	17.73	7.13468e+06	6.38639e+06	141125	20.83	3.1	4.8209
ubiquinol 10_319.19167_8.163		9888.45	906788	355451	17.17	13533.3	11629.5	108492	14.65	-2.52	3.07905	Bufa-20,22-dienolide_355.26347_9.116		6.59395e+06	5.74591e+06	5.26875e+06	22.48	8.96173e+06	4.31295e+06	7.70543e+06	22.67	0.19	1.67607
[Similar to: N~1~-[2,6-dinitro-4-(trifluoromethyl)phenyl]ethane-1,2-diamine; ΔMass: 7.1427 Da]_300.19305_5.422		376599	130376	341032	17.96	52882.5	84598.7	665468	17.13	-0.83	1.87086	Dibenzothiophene_185.04199_0.792		5.29962e+06	4.46745e+06	3.44918e+06	22.05	1.87826e+07	9.88492e+06	8.30909e+06	23.46	1.41	41.1828
2H-Pyran_127.04016_0.908		897337	111984	531005	18.52	926064	732200	470582	19.38	0.86	2.41167	Methionylleucine_263.14243_3.463		1.22081e+07	1.39215e+07	4.10598e+06	23.08	1.24759e+07	1.63188e+06	1.11386e+07	22.54	-0.54	1.53858
MFCD20640990_187.06129_2.535		446688	1.21287e+06	922312	19.6	2.12784e+06	1.45283e+06	785897	20.36	0.76	3.65293	aspergillic acid_242.18631_1.961		5.534e+06	6.00962e+06	5.03327e+06	22.39	209663	6.62043e+06	4.91424e+06	20.85	-1.54	2.56886
Undecanedioic acid_261.13443_6.54		81320.6	494543	34463	16.77	1.01647e+06	395767	166201	18.63	1.86	4.12222	Kinoprene_277.2163_10.368		9.25205e+06	2.75565e+07	6.36724e+06	23.49	1.23824e+07	1.43758e+07	7.50113e+06	23.39	-0.1	1.1124
Dinemasone A_229.10822_4.852		226922	176030	837215	18.3	1.89394e+06	1.30846e+06	1.15208e+06	20.44	2.14	23.405	6-Hydroxy-1,2-hexanediyl dioctanoate_409.2927_13.404		7.95035e+06	7.02967e+06	86321.3	20.69	96249.3	76570.4	92794.5	16.43	-4.26	8.45059
2-O-ETHYL ASCORBIC ACID_203.05624_2.292		408848	623996	242287	18.59	1.82406e+06	1.0108e+06	701369	20.06	1.47	16.5906	3-BHA_181.12226_11.78		8.05822e+06	5.50762e+06	1.09136e+07	22.9	1.16728e+07	1.39086e+07	1.09584e+07	23.53	0.63	9.24402
N-acetyl-L-2-aminoadipic acid_184.06161_1.342		1.39e+06	1.01004e+06	1.47827e+06	20.28	502912	2.0695e+06	1.93365e+06	20.27	-0.01	1.01645	(-)-Rhododendrin_346.18627_11.496		49866.3	47678.6	3.13911e+06	17.58	8.00148e+06	5.01355e+06	5.4157e+06	22.52	4.94	14.2664
Acetic acid_59.01386_19.81		3.40108e+06	2.52453e+06	1.23544e+06	21.07	1.04182e+07	3.83054e+06	3.06794e+06	22.24	1.17	6.04146	Malondialdehyde_186.076_1.234		5.19114e+07	8.49513e+06	6.14064e+07	24.84	2.25912e+07	4.26511e+06	4.34086e+07	23.94	-0.9	1.84243
8-Epideoxyloganic acid_359.13488_7.26		10162.6	10407.9	306239	14.96	900545	534896	632627	19.36	4.4	17.9456	N,N-Bis(polyoxyethylene)oleylamine_444.40509_16.544		3.28673e+06	2.75915e+07	4.22221e+06	22.79	46801.6	696854	1.2836e+07	19.51	-3.28	3.77518
[Similar to: 5-oxo-5-[4-(1H-pyrrol-1-yl)piperidino]-3-(3,4,5-trimethoxyphenyl)pentanoic acid; ΔMass: 0.9916 Da]_430.19473_1.356		753222	377587	381344	18.86	1.0521e+06	660015	649038	19.55	0.69	6.14058	2-Dimethylamino-5,6-dimethyl-4-hydroxypyrimidine_168.11308_1.051		4.32372e+06	671378	2.60086e+06	20.9	1.06937e+06	316054	6.78148e+06	20.33	-0.57	1.38041
Dinemasone A_229.10821_7.764		228541	831725	85503.7	17.95	957122	906355	259568	19.21	1.26	3.06148	ornithinoalanine_220.12912_0.719		3.26633e+06	2.03786e+06	1.30929e+06	20.97	958223	812803	1.79705e+06	20.09	-0.88	6.10702
Emedastine_301.20215_9.376		500759	898802	552241	19.26	301814	184980	1.17284e+06	18.62	-0.64	2.05357	Dinotefuran-metabolite-UF_159.11285_1.049		1.53648e+07	7.61465e+06	1.32644e+07	23.46	7.8678e+06	8.83071e+06	1.86785e+07	23.38	-0.08	1.14777
guaietolin_211.09765_7.736		330646	201989	858612	18.56	1.77203e+06	826184	1.05128e+06	20.14	1.58	11.8069	Gln-Leu-Val-Pro_456.28079_5.722		4.95891e+06	4.69018e+06	6.59833e+06	22.35	728425	3.00503e+06	2.90685e+06	20.82	-1.53	10.988
Histamine_156.07791_0.94		491311	358124	135408	18.13	317652	759790	1.15575e+06	19.32	1.19	4.86306	[Similar to: PEG n10; ΔMass: -43.0294 Da]_416.25062_5.731		668007	208012	3.13352e+06	19.53	405252	1.44428e+06	7.65435e+06	20.65	1.12	1.85538
Vitamin C_175.02486_7.907		7942.19	7277.13	653202	15.03	614692	610425	766817	19.33	4.3	8.65456	Imazapyr_262.11866_4.779		6.60891e+06	1.09718e+07	4.45303e+06	22.71	6.10396e+06	8.36589e+06	6.82305e+06	22.75	0.04	1.07365
Actinozine A_241.11952_4.671		1.08521e+06	927119	960834	19.92	965727	967683	941464	19.87	-0.05	1.81009	Levetiracetam_171.11281_5.324		1.69531e+07	7.44422e+06	9.82949e+06	23.36	1.01957e+07	8.45861e+06	1.06186e+07	23.21	-0.15	1.412
Daminozide_159.07754_0.831		491729	535822	621757	19.06	322827	616492	224016	18.44	-0.62	4.41478	Medrogestone_373.27399_9.133		1.26883e+07	9.96776e+06	8.98897e+06	23.32	2.12477e+07	7.27107e+06	1.52093e+07	23.66	0.34	1.97069
Neplanocin A_262.09338_0.959		1.39242e+06	59005.7	1.20215e+06	18.82	98041.2	78458.8	799801	17.48	-1.34	1.97622	5-(N,N-Dimethylcarbamimidamido)-2-oxopentanoic acid_202.1184_1.045		4.45455e+06	4.58645e+06	8.38004e+06	22.4	4.23749e+06	5.88906e+06	5.61749e+06	22.31	-0.09	1.27139
His-Leu_267.14648_1.168		780776	336739	670995	19.1	1.08878e+06	797883	1.14201e+06	19.93	0.83	9.01543	(11E)-15-Oxo-11-icosenoic acid_325.27391_12.981		2.21767e+06	8.4498e+06	2.23423e+06	21.73	8.45972e+06	9.25999e+06	1.226e+07	23.23	1.5	11.7648
danegaptide_290.11479_4.631		317239	566111	520615	18.79	867270	604629	486961	19.28	0.49	4.05533	2-Ethyl-4,5-dimethylthiazole_126.09129_6.023		7.93828e+06	1.05947e+07	3.3872e+06	22.65	6.24133e+06	4.27582e+06	1.13983e+07	22.68	0.03	1.03817
CJ-13,981_339.18143_9.063		16273.7	194594	410786	16.74	829125	546638	529777	19.25	2.51	6.55209	Amaromycin_526.33788_9.272		26819.2	30540.4	1.3298e+06	16.65	3.32848e+06	350949	2.26583e+06	20.4	3.75	6.71303
asn-phe_278.11471_2.815		727046	42973.3	259833	17.62	431705	248076	1.2456e+06	18.96	1.34	2.61275	5-Hydroxy-DL-tryptophan_221.09202_1.438		1.35491e+07	1.14409e+07	1.36769e+07	23.61	1.05e+07	9.37888e+06	1.42577e+07	23.42	-0.19	2.66239
3-Mercaptopropionic acid_105.00158_15.324		546317	608155	5878.42	16.93	4489.32	4072.69	4354.21	12.07	-4.86	10.8344	HMBA_201.1598_4.019		1.46032e+07	1.05331e+06	2.45376e+06	21.68	514567	237158	696040	18.75	-2.93	13.7904
4-Hydroxy-5-methylfuran-3(2H)-one_113.02444_1.162		1.41357e+06	2.15138e+06	3.92864e+06	21.12	7.10934e+06	3.69311e+06	2.50193e+06	21.94	0.82	3.96054	Dehydroglycine_106.04974_0.767		1.3764e+06	312913	3.72169e+06	20.16	417356	1.79864e+06	3.54733e+06	20.4	0.24	1.15171
3,4,5-Trihydroxy-1-cyclohexenecarboxylic acid_173.04568_1.354		1.34255e+06	737905	1.55332e+06	20.14	920016	664866	680771	19.51	-0.63	6.36655	Cyclo-(L-Pro-L-Met)_229.10047_5.083		6.21396e+06	6.51216e+06	4.37884e+06	22.42	4.91651e+06	4.38666e+06	4.8328e+06	22.17	-0.25	4.0701
(E)-3-O-Methyl entacapone_318.10972_5.113		396489	818481	497829	19.05	681145	1.24914e+06	864019	19.78	0.73	7.00805	5-Nitro-2-propoxyaniline_229.11815_1.641		2.65491e+07	2.47828e+07	1.90881e+07	24.47	1.25746e+07	8.01922e+06	3.18489e+07	23.81	-0.66	2.956
Oxagrelate_275.10391_5.367		553118	810056	440404	19.15	726124	739384	480617	19.28	0.13	1.40176	Botrydial_311.18547_9.655		42944.6	66978.5	3.29254e+06	17.69	8.04376e+06	4.75035e+06	4.62219e+06	22.42	4.73	12.8469
UBI N252_208.99484_6.349		17457.2	16292.1	14120	13.96	26042.8	22710.3	19378.9	14.46	0.5	33.5278	Piperidine_86.09633_19.315		1.20445e+07	1.2533e+07	2.48745e+07	23.89	6.16325e+06	8.88296e+06	6.91676e+06	22.79	-1.1	23.9029
2,3,4,5-tetrahydrodipicolinic acid_170.04591_1.264		2.84886e+06	609846	1.68093e+06	20.45	709338	958217	1.3029e+06	19.87	-0.58	2.18167	(+)-geniposide_389.14454_5.946		206891	163445	4.88207e+06	19.07	5.85371e+06	3.80243e+06	5.37174e+06	22.23	3.16	8.51455
Pyridoxal_166.05103_1.289		510940	334375	188182	18.28	462398	129606	246764	17.91	-0.37	1.6412	Lovastatin_405.26378_9.226		8.09943e+06	1.12367e+07	6.72931e+06	23.02	3.84337e+06	4.88858e+06	6.22831e+06	22.22	-0.8	18.4026
QV1MVO1R_190.05106_6.216		924629	764598	734560	19.62	632047	865587	931139	19.61	-0.01	1.03595	pro-met_247.11114_1.344		7.66912e+06	2.63734e+06	1.98783e+06	21.71	841294	1.88869e+06	4.38365e+06	20.86	-0.85	2.46476
lys-leu_258.1824_1.248		58150.7	70338.9	231812	16.58	155729	1.25677e+06	1.12771e+06	19.2	2.62	11.4973	danegaptide_292.12933_4.879		1.30975e+06	2.23413e+06	1.29478e+06	20.57	1.21926e+07	1.08697e+06	1.31081e+06	21.3	0.73	1.78942
5-Nitro-o-toluidine_151.05138_1.448		279218	56658.2	329369	17.4	280242	662784	168761	18.27	0.87	2.30329	asn-phe_280.12918_2.713		6.22425e+06	285668	5.04635e+06	20.99	7.5794e+06	6.32899e+06	1.01277e+07	22.91	1.92	3.91425
Piracetam_141.06701_0.897		360505	262432	312845	18.24	329697	344216	623693	18.66	0.42	3.75226	L-Pyroglutamic acid_130.04986_0.775		5.50075e+06	3.17484e+06	3.93267e+06	21.97	3.70637e+06	3.27269e+06	4.647e+06	21.87	-0.1	1.33977
[Similar to: N~1~-[2,6-dinitro-4-(trifluoromethyl)phenyl]ethane-1,2-diamine; ΔMass: 7.0488 Da]_300.09911_5.163		763965	906910	598366	19.51	992513	1.1434e+06	805958	19.89	0.38	5.89046	9,10-Dihydroxystearic acid_299.25818_12.1		2.74712e+06	4.2345e+06	2.06703e+06	21.46	3.70387e+06	2.85553e+06	3.22596e+06	21.63	0.17	1.59619
Cephalosporolide J_215.09258_6.128		550730	800158	769519	19.41	895332	652282	778178	19.55	0.14	1.81711	Hydroxylysine_163.1077_1.048		9.89714e+06	1.50313e+07	9.76818e+06	23.43	5.51554e+06	4.69227e+06	8.1359e+06	22.5	-0.93	24.5339
glutaral_145.0507_1.258		2.03836e+06	1.19875e+06	1.99932e+06	20.69	2.92907e+06	3.71674e+06	2.27997e+06	21.48	0.79	13.7463	octinoxate_291.19568_12.584		655922	2.74348e+06	876157	20.15	1.91423e+06	2.51458e+06	374143	20.21	0.06	1.04714
[Similar to: NP-002477; ΔMass: -243.1898 Da]_255.05989_0.839		562796	127133	159334	17.78	196419	135873	324649	17.65	-0.13	1.14852	Embelin_295.19045_9.714		654473	208250	7.44547e+06	19.94	1.09552e+07	7.87995e+06	8.38834e+06	23.1	3.16	9.29861
Not named_336.12039_1.589		919970	346356	316904	18.83	183960	29107.9	182264	16.6	-2.23	10.8394	Sorbic acid_113.05961_10.856		2.14068e+06	2.10337e+06	9.06391e+06	21.72	7.41998e+06	7.32027e+06	1.14999e+07	23.03	1.31	6.80935
Acetylcarnitine_202.10838_6.054		493882	369628	371832	18.64	699018	574154	443243	19.1	0.46	8.33243	Oglufanide_334.14_5.069		3.0898e+06	8.33925e+06	1.81745e+06	21.78	188609	2.91844e+06	2.73874e+06	20.13	-1.65	3.13577
p-Toluenesulfonic acid_171.01226_3.167		262909	177546	297265	17.87	363443	119893	58623.5	17.06	-0.81	2.7367	asn-phe_280.12913_1.305		6.09254e+06	5.16137e+06	3.85867e+06	22.24	6.73407e+06	3.0939e+06	5.15799e+06	22.18	-0.06	1.12901
Eglumetad_184.06162_1.327		1.39e+06	1.01004e+06	1.47827e+06	20.28	502912	2.0695e+06	1.93365e+06	20.27	-0.01	1.01645	Triethylenediamine_176.11594_0.762		1.90078e+07	399011	1.28406e+07	22.13	1.55881e+06	4.31706e+06	4.31482e+06	21.55	-0.58	1.30322
Glu-Gly_203.06754_1.234		1.72109e+06	1.33129e+06	248819	19.66	637498	569880	1.13685e+06	19.51	-0.15	1.14233	Muscimol_115.05011_1.071		264578	206014	248731	17.86	261856	212212	227966	17.83	-0.03	1.20834
Dinemasone A_229.1082_6.665		160764	633007	967964	18.82	1.46239e+06	997685	819619	20.02	1.2	4.61702	Avaroferrin_387.22409_5.015		1.057e+07	7.40172e+06	9.12935e+06	23.09	9.05719e+06	8.27023e+06	6.96597e+06	22.94	-0.15	2.16269
Kynurenine_207.07756_5.91		765416	551655	615785	19.28	631810	638133	644127	19.28	0	1.00316	Dolichotheline_196.14443_2.473		7.99302e+06	1.66614e+06	1.40994e+06	21.34	84745.2	90641.5	1.37969e+06	17.74	-3.6	12.3933
Methionylleucine_261.12793_4.859		8194.18	7992.62	57057	13.92	60136.9	13641.8	218817	15.78	1.86	3.57723	Ethyl docosahexaenoate_357.27908_14.775		4.95819e+06	8.77204e+06	759720	21.61	478437	485372	3.51745e+06	19.83	-1.78	3.54786
CJ-15,801_216.08782_2.258		1.39948e+06	950828	1.4139e+06	20.24	1.04201e+06	758190	1.15622e+06	19.89	-0.35	3.89821	Isoprene_86.09633_19.31		1.20445e+07	1.2533e+07	2.48745e+07	23.89	6.16325e+06	8.88296e+06	6.91676e+06	22.79	-1.1	23.9029
[Similar to: N~1~-[2,6-dinitro-4-(trifluoromethyl)phenyl]ethane-1,2-diamine; ΔMass: 7.1428 Da]_300.19311_5.698		24057	7534.55	132477	14.82	22186.3	212596	716865	17.2	2.38	3.59468	oxiracetam_159.07641_2.228		2.25503e+06	1.75641e+06	6.07552e+06	21.46	1.85812e+06	6.55393e+06	7.69688e+06	22.12	0.66	2.06747
Artemotil_311.18659_11.64		407427	685294	450731	18.93	584063	366239	502334	18.86	-0.07	1.22757	L-(-)-Serine_169.05836_0.807		2.323e+07	1.05486e+07	1.16515e+07	23.76	1.1093e+07	7.5687e+06	1.51172e+07	23.37	-0.39	2.25014
DL-TYROSINE_180.06671_2.219		1.47044e+06	1.27503e+06	1.22462e+06	20.33	1.31253e+06	1.25996e+06	1.32546e+06	20.31	-0.02	1.24717	(−)-nabilone_373.27393_10.191		5.32813e+06	3.79097e+06	4.67204e+06	22.12	4.6871e+06	4.97598e+06	6.42512e+06	22.34	0.22	3.0484
phe-gln_292.13049_1.425		50307.5	27011.3	152941	15.85	745302	291607	298935	18.62	2.77	31.1391	N,N-dimethylarginine_203.1501_0.869		7.2478e+06	8.18601e+06	7.47068e+06	22.86	8.1452e+06	8.67926e+06	7.25671e+06	22.93	0.07	2.048
N~6~-[(2R)-3,4-Dihydro-2H-pyrrol-2-ylcarbonyl]-L-lysine_240.13547_4.649		262434	83898.8	186480	17.29	358423	957503	123897	18.41	1.12	3.16521	4-Aminobenzoic acid_138.05495_5.788		303094	425499	954322	18.92	213884	203687	1.37391e+06	18.58	-0.34	1.32708
6-Amino-1,5-dihydro-4H-imidazo[4,5-c]pyridin-4-one_149.04727_1.055		486061	202435	340915	18.3	201714	328285	496983	18.29	-0.01	1.01328	Mullinamide A_496.277_5.485		1.28733e+06	1.32018e+06	754474	20.05	8.79825e+06	4.25352e+06	1.42464e+06	21.84	1.79	11.0367
Azelaic acid_187.09764_5.955		1.84873e+06	1.12973e+06	1.37107e+06	20.44	4.567e+06	1.45549e+06	1.49772e+06	21.04	0.6	2.77195	N-Acetylvanilalanine_295.129_4.521		6.73008e+06	1.39062e+07	8.56336e+06	23.15	5.24271e+06	3.98596e+06	4.50406e+06	22.12	-1.03	28.5861
leu-gln_258.146_2.411		516678	97073.7	944827	18.47	251856	53708.8	1.19527e+06	17.95	-0.52	1.30559	[Similar to: 3-[(2-pyridylthio)methyl]-4,5-dihydro-1H-pyrazol-5-one; ΔMass: 38.1889 Da]_246.24277_9.427		5.36955e+06	3.23221e+06	279839	20.69	1.99201e+06	986940	1.61315e+06	20.49	-0.2	1.12785
Maleamic acid_114.01972_0.912		248459	1.4429e+06	933288	19.41	2.06629e+06	1.57348e+06	713285	20.34	0.93	2.81616	Levetiracetam_171.11275_2.723		8.43522e+06	6.09567e+06	6.94725e+06	22.76	5.16034e+06	1.09129e+07	7.04369e+06	22.81	0.05	1.12368
1,4-Bis(2-ethylhexyl) sulfosuccinate_421.22684_13.475		1.33138e+06	1.5531e+06	540403	19.98	188608	390260	1.9798e+06	19.01	-0.97	2.34127	Acetylagmatine_173.1396_1.04		1.38662e+06	911701	3.3068e+06	20.62	415072	793043	1.85786e+06	19.7	-0.92	3.04268
Cinnamic acid_147.04523_2.138		2.94438e+06	1.44322e+06	2.50313e+06	21.07	1.42444e+06	1.43325e+06	1.23021e+06	20.37	-0.7	10.4666	3,4-Diaminopyridine_110.07109_1.047		1.74515e+07	2.07818e+07	1.56261e+07	24.09	3.87097e+06	4.08094e+06	1.4447e+07	22.54	-1.55	14.0794
3-(5-Hydroxy-8,8-dimethyl-2-oxo-2H,8H-pyrano[2,3-f]chromen-4-yl)phenyl hydrogen sulfate_415.0493_9		63051.6	527178	44518.6	16.8	12645.9	11086.8	193891	14.88	-1.92	3.00289	Testate_401.30524_12.553		2.62469e+06	2.4794e+06	579184	20.57	3.05765e+06	45461.3	921115	18.94	-1.63	2.22548
Dimethyl (3-oxocyclohexyl)malonate_227.09265_5.771		173431	115034	636244	17.83	1.08153e+06	671981	741630	19.63	1.8	12.5067	7-ketodeoxycholic acid_407.2795_8.799		1.01276e+06	910292	879816	19.83	661505	626593	1.70335e+06	19.76	-0.07	1.11793
Thiazole-5-methanol_114.00195_2.206		1.14303e+06	232853	744932	19.15	214896	338736	500109	18.34	-0.81	2.85729	Embelin_295.19053_13.359		104545	657876	4.71515e+06	19.39	5.87391e+06	5.66691e+06	4.43931e+06	22.33	2.94	7.24344
2,5,8,11,14,17-Hexaoxanonadecan-19-ol_295.17508_13.424		45675.9	87184.2	612524	17.04	1.77333e+06	1.58095e+06	780753	20.31	3.27	19.6576	3,4-Dihydroxy-12,13-epoxytrichothec-9-en-15-yl acetate_325.16483_10.857		94478	81995.4	1.15803e+06	17.66	4780398	3.09915e+06	2.4552e+06	21.66	4	28.7035
Propionic acid_73.02948_19.773		2.01253e+06	1.10034e+06	607038	20.07	7.61226e+06	1.9666e+06	1.60558e+06	21.46	1.39	5.44695	N-Acetyl-L-leucine_156.10189_4.364		1.15394e+07	4.12956e+06	2.89392e+07	23.41	1.70453e+06	1.11877e+06	3.93018e+06	20.9	-2.51	16.3747
N-Acetyl-L-histidine_242.07877_0.921		391159	604404	2.41088e+06	19.66	1.18301e+06	3.53041e+06	1.991e+06	20.95	1.29	4.33324	Ala-Tyr_253.11834_3.236		8.92096e+06	9.50881e+06	8.55868e+06	23.1	8.81197e+06	1.02981e+07	1.24575e+07	23.31	0.21	4.32242
Armillariol B_205.10819_6.401		29612.3	739198	34089.5	16.47	630636	678373	19040.3	17.62	1.15	1.56174	N-(3-hydroxy-dodecanoyl)-homoserine lactone_300.21699_8.996		56616.8	56072.9	1.8811e+06	17.47	2.25532e+06	993123	2.32425e+06	20.72	3.25	7.48044
[Similar to: AB-FUBINACA; ΔMass: 0.0552 Da]_367.21275_8.947		130696	729859	335926	18.28	864423	823434	361179	19.28	1	3.42588	Aceglutamide_189.08685_2.981		1.70244e+07	5.17751e+06	2.54031e+07	23.64	7.36467e+06	1.00992e+07	2.06058e+07	23.46	-0.18	1.19852
(E)-p-coumaric acid_163.04012_5.248		900166	338784	271768	18.73	356415	1.53966e+06	434070	19.24	0.51	1.71916	sulukast_490.28622_5.657		8.95887e+06	7.53143e+06	7.15193e+06	22.9	6.55126e+06	7.29169e+06	6.67905e+06	22.7	-0.2	7.01912
Itaconic acid_129.01939_3.092		719524	500576	579914	19.18	2.81967e+06	1.33575e+06	1.54768e+06	20.78	1.6	86.2069	Troxipide_295.16532_3.588		107400	86969.2	656104	17.48	295625	135915	3.11345e+06	18.93	1.45	2.34029
Trans-7,9-dihydroxy-3-methyl-8-oxo-dodecan-4-olide_317.16071_6.106		11413.1	10556.4	252603	14.93	664496	479730	606675	19.14	4.21	20.0674	N~6~,N~6~-Dimethyllysine_175.14378_0.762		4.62722e+06	2.52206e+06	3.59219e+06	21.73	1.79981e+06	1.55365e+06	1.75013e+06	20.7	-1.03	59.0005
Trans-7,9-dihydroxy-3-methyl-8-oxo-dodecan-4-olide_317.16074_5.821		10803.7	8881.16	284285	14.88	622566	592117	717932	19.29	4.41	18.8455	Piracetam_143.08159_1.16		2.87381e+06	494420	3.26491e+06	20.67	513866	573958	7.00996e+06	20.28	-0.39	1.23476
Ala-Tyr_251.10384_3.31		951416	862814	841746	19.75	938894	1.12609e+06	1.18476e+06	20.04	0.29	14.6897	EPEA_363.3009_9.93		4.21458e+06	1.27211e+06	5.7964e+06	21.58	142053	112221	4.52038e+06	18.67	-2.91	5.27755
Dodecanedioic acid_229.14458_6.27		241855	224004	789889	18.42	56305.9	22614.3	197512	15.95	-2.47	11.8718	Tetraacetylethylenediamine_229.11831_2.854		2.0323e+07	4.76097e+06	1.66974e+07	23.48	1.28249e+07	3.80004e+07	9.85558e+06	24.01	0.53	1.70621
noradrenaline_168.06675_1.064		386677	178132	88459.6	17.48	159611	104988	406520	17.53	0.05	1.05006	Isononadecasphinganine_316.32116_12.508		3.14781e+06	5.41334e+06	65654.5	19.99	61696.8	62231.1	47249.9	15.79	-4.2	9.53434
A-12(13)-EpODE_293.21243_11.155		162561	277313	184650	17.63	1.50994e+06	649423	318651	19.37	1.74	15.4679	Tecadenoson_338.14476_5.983		158135	162087	5.74724e+06	19.01	8.10518e+06	4.34309e+06	3.7484e+06	22.28	3.27	7.35018
N-ethylmaleimide_124.04047_19.958		1.30431e+06	1.08578e+06	375703	19.63	2.66715e+06	1.60709e+06	1.35866e+06	20.78	1.15	7.01735	(2S)-2-Piperazinecarboxylic acid_131.08153_0.722		274825	118144	220143	17.56	64968.5	73289.2	204757	16.6	-0.96	4.79644
[Similar to: 8-Isoprostaglandin F1α; ΔMass: -44.0802 Da]_311.16878_12.81		1.7933e+06	1.95069e+06	2.51637e+06	20.98	866707	1.69349e+06	1.93405e+06	20.43	-0.55	4.29777	[Similar to: 1-{4-[(3S)-3-(5-Fluoro-1H-benzimidazol-2-yl)-1-pyrrolidinyl]-1-piperidinyl}ethanone; ΔMass: -0.9285 Da]_330.26432_11.765		2.69299e+06	2.33953e+07	1.90575e+06	22.23	3.96393e+06	1.88177e+07	1.65585e+06	22.25	0.02	1.00672
L-(+)-Alanine_88.0404_2.959		2.13592e+07	1.99688e+06	2.77259e+06	22.23	1.84597e+06	2.86405e+06	2.05378e+06	21.08	-1.15	2.85615	Drostanolone propionate_361.27399_10.85		4.45276e+06	1.93963e+06	4.08704e+06	21.65	3.20768e+06	4.33148e+06	3.59048e+06	21.81	0.16	1.42928
Cholesterol sulfate_465.30469_18.531		2.38507e+06	1.04249e+06	1.32424e+06	20.5	432704	405292	922504	19.06	-1.44	20.1625	Levetiracetam_171.11277_5.722		5.27837e+06	3.15852e+06	1.39692e+07	22.55	6.20733e+06	1.143e+07	1.81575e+07	23.38	0.83	2.88228
3,4-Dimethoxyphenethylamine_180.10304_10.019		582898	433232	450811	18.89	516103	525865	515343	18.99	0.1	1.98994	3-oxo-C12-HSL_298.20145_9.274		39586.5	152290	4.61778e+06	18.21	5.64673e+06	2.87802e+06	5.36107e+06	22.08	3.87	7.43854
tert-Butyl 3-amino-1-methyl-2,3-dioxopropylcarbamate_215.10382_1.531		899852	576730	717180	19.46	626796	610456	688876	19.29	-0.17	2.28451	Thalassemine_299.11026_4.655		186119	156389	7.72326e+06	19.21	1.03594e+07	6.41505e+06	3.98018e+06	22.61	3.4	6.92487
Dimethyl (3-oxocyclohexyl)malonate_227.09262_6.281		273040	227722	590879	18.34	947812	705750	538841	19.44	1.1	11.7163	3,6,9,12-Tetraoxaicosan-1-ol_307.24811_11.65		4.51309e+06	4.3342e+06	647073	21.15	601229	623401	718787	19.3	-1.85	8.56692
epsilon-(gamma-Glutamyl)-lysine_274.14101_2.71		321357	176707	725362	18.4	296977	549614	1.12717e+06	19.12	0.72	2.35297	Oidioperazine C_302.11362_5.267		652230	956883	430836	19.3	1.07348e+06	581811	422040	19.29	-0.01	1.0141
Phenobarbital_231.0776_6.617		369988	448613	410658	18.64	308771	347532	475296	18.5	-0.14	1.89223	4-Hydroxyprolylleucine_245.14954_2.403		1.41676e+07	9.16026e+06	1.10919e+07	23.43	8.49823e+06	8.93246e+06	1.35122e+07	23.27	-0.16	1.69176
[Similar to: Cholic acid; ΔMass: 47.0008 Da]_454.28107_11.002		18998.9	26394	14343.6	14.24	20485.1	18790.8	17821.4	14.21	-0.03	1.06995	Marimastat_332.21817_6.584		422646	313311	688996	18.78	309167	4.97142e+06	5.0075e+06	20.91	2.13	5.08725
asn-phe_278.11478_1.353		514223	444174	115352	18.18	517609	307527	365118	18.56	0.38	1.59838	Emivirine_303.17043_8.937		2.55298e+06	1.26964e+07	1.26187e+06	21.72	1.00165e+06	2.33306e+06	4.83022e+06	21.1	-0.62	1.59083
N-acetyl-beta-D-glucosaminylamine_219.0987_0.846		641341	121389	653640	18.5	278768	228646	418733	18.19	-0.31	1.36601	[Similar to: AQH; ΔMass: -198.1253 Da]_157.04721_0.884		5.70074e+06	1.01928e+06	5.8922e+06	21.63	2.31353e+06	3.26676e+06	4.37257e+06	21.61	-0.02	1.01477
(+/-)-2-Hydroxyglutaric acid_147.02994_5.322		688287	496221	1.2932e+06	19.54	1.61876e+06	2.83119e+06	1.56427e+06	20.88	1.34	19.0212	ZINGEROL_197.11719_9.468		2.57046e+06	3.13162e+06	9.10549e+06	22	1.51671e+07	9.96316e+06	1.54432e+07	23.66	1.66	19.6433
Glutaric acid_131.035_19.655		3.96029e+06	2.26198e+06	1.07944e+06	21.02	1.08429e+07	3.99305e+06	2.74549e+06	22.23	1.21	4.82314	EDDA_177.08693_0.946		5.43636e+06	5.57234e+06	9.06107e+06	22.63	6.21789e+06	4.21042e+06	5.5004e+06	22.32	-0.31	2.87645
Cordycedipeptide A_226.1198_2.826		501127	523590	547120	19	278724	197835	619030	18.31	-0.69	4.3376	Biacetyl_104.07073_0.825		3.30089e+07	8.77082e+06	1.19041e+07	23.85	5.60758e+06	1.03022e+07	2.39214e+07	23.41	-0.44	1.59303
MFCD09953737_230.10342_5.917		539935	275874	245006	18.34	461539	375870	275233	18.47	0.13	1.29618	Secnidazole_186.08728_0.914		5.14606e+06	2.81727e+06	1.14691e+06	21.28	583004	366582	1.1911e+06	19.27	-2.01	15.1616
Troxipide_293.15089_3.727		16220.1	10122.6	41890.5	14.22	20112.3	152940	252401	16.49	2.27	6.7781	5-Hydantoinpropionic acid_205.0818_0.968		1.22311e+07	1.39959e+07	9.98792e+06	23.51	1.32805e+07	9.35458e+06	8.99657e+06	23.31	-0.2	2.37902
Troxipide_293.15091_2.986		320835	127489	575878	18.13	860045	327587	948992	19.3	1.17	4.58343	2-Aminoethyl (2R)-3-[(1Z)-1-hexadecen-1-yloxy]-2-hydroxypropyl hydrogen phosphate_438.2982_13.721		100731	3.16705e+06	102102	18.28	2.96689e+06	1.08638e+07	532600	21.3	3.02	4.52665
[Similar to: Ethyl {(1S,4S,5S)-4-[(isonicotinoylamino)methyl]-5-isopropyl-2-methyl-2-cyclohexen-1-yl}acetate; ΔMass: 0.9802 Da]_358.19853_5.863		388615	141727	763274	18.41	214622	615202	612569	18.72	0.31	1.35997	Histidylglycine_213.09819_0.733		3.23262e+06	2.37383e+06	2.06636e+06	21.26	3.6165e+06	1.95204e+06	3.51196e+06	21.48	0.22	1.75721
1,3,4-Trihydroxy-5-oxocyclohexanecarboxylic acid_189.0406_1.395		1.3991e+06	1.53315e+06	1.43776e+06	20.47	725009	1.24241e+06	990662	19.88	-0.59	16.8019	4-(2-Aminophenyl)-2,4-dioxobutanoic acid_208.06038_1.742		4.16841e+06	7.30408e+06	1.27394e+06	21.69	229986	784908	1.73702e+06	19.37	-2.32	9.16599
Acetylcarnitine_202.10842_3.356		752615	544946	612011	19.27	443537	629034	637726	19.1	-0.17	2.03312	Tetraacetylethylenediamine_229.11827_3.944		1.34671e+07	1.34591e+07	8.08408e+06	23.44	8.51216e+06	1.96572e+07	8.01626e+06	23.39	-0.05	1.07033
Cordycedipeptide A_272.12537_1.152		1.15078e+06	682021	743165	19.67	777130	490734	828060	19.38	-0.29	2.34659	7alpha-Hydroxy-3-oxochol-4-en-24-oic acid_389.26897_11.32		438184	1.39615e+06	92491.1	18.55	68644	219872	864906	17.85	-0.7	1.48651
Furfuranol_97.02948_2.128		784626	485810	1.56071e+06	19.68	2.09868e+06	930494	576729	19.99	0.31	1.43632	Ethylenediamine, N,N-diisopropyl-_145.16991_0.842		221507	207584	194499	17.66	224414	502559	204578	18.12	0.46	2.99316
epsilon-(gamma-Glutamyl)-lysine_274.14109_2.108		239799	43190.5	500713	17.4	141330	178283	833982	18.07	0.67	1.56968	3,4-Dihydroxy-12,13-epoxytrichothec-9-en-15-yl acetate_325.16476_10.759		93728.4	79500.4	2.52663e+06	18.02	2.47133e+06	3.17943e+06	2.58251e+06	21.38	3.36	9.23378
Pentoxifylline_277.12938_6.059		52953.2	630755	53191.5	16.89	616240	572719	33772.1	17.8	0.91	1.55819	AMPA_187.0713_1.029		1.37231e+07	9.99745e+06	1.19608e+07	23.49	1.0242e+07	9.94942e+06	1.29026e+07	23.39	-0.1	1.72113
Indole-3-acetic acid_174.05609_6.48		577070	384529	497424	18.87	301692	502275	358595	18.53	-0.34	3.52455	BX7175000_151.08657_1.094		4.68332e+06	978261	7.10152e+06	21.61	665815	807709	7.72741e+06	20.62	-0.99	1.89689
Levetiracetam_229.11946_1.758		117802	188160	59289.2	16.74	175873	250452	148483	17.51	0.77	4.52925	p-Isopropyl-α-methylstyrene_321.25788_11.979		9.02718e+06	4.28827e+06	5.50302e+06	22.51	8.07409e+06	7.05142e+06	7.46331e+06	22.84	0.33	2.78652
mesifurane_141.05576_4.967		89935.1	91630.1	211132	16.88	1.3068e+06	636947	498803	19.51	2.63	94.1088	MFCD00025555_203.13878_1.043		3.22343e+06	1.99667e+06	1.89717e+06	21.13	1.68458e+06	1.01699e+06	2.41727e+06	20.61	-0.52	3.34004
MFCD00037215_217.0831_1.211		320952	132149	287964	17.81	224153	197772	325463	17.89	0.08	1.15019	Epopromycin B_415.28212_11.977		7.31257e+06	3.1079e+06	2.22461e+06	21.82	3.26016e+06	928890	3.12309e+06	21.01	-0.81	2.76493
lactide_143.03504_19.709		736827	502496	272386	18.83	1.99764e+06	710855	589282	19.85	1.02	4.67845	diacetyl trimer_259.11761_5.224		186382	148532	1.25852e+07	19.42	1.63533e+06	4.07284e+06	6.80595e+06	21.77	2.35	2.9335
3-hydroxy-3-methyloxindole_162.05611_1.863		573135	702510	164809	18.63	19498.6	247211	212720	16.62	-2.01	4.69451	[Similar to: L-Tyrosine; ΔMass: 17.9593 Da]_200.04051_0.984		2.76001e+06	4.35785e+06	1.31578e+06	21.26	3.79405e+06	8.57372e+06	1.02532e+06	21.62	0.36	1.344
HC blue 2_284.12534_3.304		591432	569973	515885	19.09	707557	684194	489234	19.24	0.15	2.19655	Sorbic acid_113.05962_12.018		4.38552e+06	4.82697e+06	1.34e+07	22.65	1.14257e+07	1.12979e+07	1.37313e+07	23.53	0.88	5.96328
3-Hydroxyundecanoic acid_201.14972_9.098		184880	373196	101952	17.55	316551	267496	110723	17.69	0.14	1.16754	Rimexolone_371.2583_10.145		4.76181e+06	9.16891e+06	3.79144e+06	22.39	3.57287e+06	4.26438e+06	4.66448e+06	21.98	-0.41	2.74015
4-Hydroxyprolylleucine_243.13513_1.851		1.45085e+06	820577	1.28545e+06	20.14	763937	789736	1.06728e+06	19.72	-0.42	4.36838	Traumatin_195.13789_9.912		1.17134e+06	1.06931e+07	2.53856e+06	21.6	3.43969e+06	3.50847e+06	3.86321e+06	21.78	0.18	1.17133
Ethanal tetramer_175.09765_7.134		208964	597190	43447.7	17.42	660186	688102	88276.7	18.38	0.96	1.82276	L-(-)-Serine_147.07639_1.061		4.33554e+07	2.60637e+07	3.74979e+07	25.06	2.83302e+07	1.40655e+07	1.80195e+07	24.2	-0.86	12.3541
gaboxadol_199.07246_1.215		2.44554e+06	1.66774e+06	2.12906e+06	20.97	2.37151e+06	5.08411e+06	2.8229e+06	21.63	0.66	6.64814	2-Isocapryloyl-3R-hydroxymethyl-gamma-butyrolactone_243.15908_11.354		4.70192e+06	3.86821e+06	4.61068e+06	22.06	120763	4.75399e+06	4.38409e+06	20.38	-1.68	2.56586
N~6~-[(2R)-3,4-Dihydro-2H-pyrrol-2-ylcarbonyl]-L-lysine_240.13546_5.205		425829	415729	427174	18.69	549670	544915	439224	18.96	0.27	14.9582	4-ACETAMIDOBUTYRIC ACID_146.08119_1.014		572373	1.3895e+06	302999	19.25	1.33253e+06	1.01477e+06	779370	19.96	0.71	2.83631
gamma-Aminobutyric acid_102.05609_1.214		522110	913014	426797	19.17	158197	164452	332584	17.65	-1.52	29.6147	geroquinol_247.16927_11.781		4.06722e+06	2.49016e+06	4.97321e+06	21.82	5.56747e+06	6.51762e+06	4.62177e+06	22.39	0.57	6.50462
[Similar to: N-{5-(tert-Butyl)-2-[(2-morpholinoacetyl)amino]phenyl}-2,2,2-trichloroacetamide; ΔMass: -116.9203 Da]_317.16068_6.35		55352.3	28732.9	2.04719e+06	17.18	1.02051e+06	833314	1.23284e+06	19.95	2.77	4.51038	N(6),N(6)-Dimethyladenine_164.09303_1.335		2.74252e+06	2.60873e+06	1.0647e+06	20.91	564797	953726	1.62185e+06	19.87	-1.04	5.86208
[Similar to: NP-018458; ΔMass: -178.0403 Da]_383.2302_5.875		321838	122441	420373	17.96	228865	355417	652555	18.52	0.56	2.14562	N-acetyl-L-leucine-L-serine-L-alanine_332.18178_2.151		7.23595e+06	3.52654e+06	7.77278e+06	22.48	3.30958e+06	8.30825e+06	1.0558e+07	22.66	0.18	1.27457
2-isopropylmaleic acid_157.05075_1.296		447245	82253.1	615721	18.11	588633	458529	1.59127e+06	19.53	1.42	3.98649	N-acetyl-L-2-aminoadipic acid_204.08665_1.199		971371	2.9675e+06	836884	20.36	5.15505e+06	2.63214e+06	891019	21.13	0.77	2.2017
Succinic anhydride_145.01428_5.991		25023.2	19077.4	88511.6	15.09	698881	402347	664572	19.12	4.03	193.274	12-oxo Phytodienoic Acid_293.21128_10.961		1.20394e+06	3.52369e+06	615533	20.39	8.77847e+06	9.45542e+06	3.34056e+06	22.64	2.25	15.8763
L-Proline_174.07722_1.229		3.00148e+06	1.43297e+06	1.752e+06	20.9	1.3274e+06	1.33779e+06	1.7664e+06	20.48	-0.42	3.44579	1,2-Cyclohexanediol_117.09091_5.721		480713	375428	7.59248e+06	20.08	3.22528e+07	1.13929e+07	6.95042e+06	23.7	3.62	12.8457
Tiglylcarnitine_242.13984_6.872		37685.8	573068	27709.9	16.36	526938	452631	58418.9	17.88	1.52	2.32706	ibufenac_193.12226_12.584		2.17926e+06	3.17941e+06	1.94644e+06	21.18	3.22718e+06	3998077	6.9854e+06	22.1	0.92	12.2205
Acetylcadaverine_143.11902_2.236		696272	419758	257546	18.69	620522	542127	814254	19.31	0.62	4.19324	2-carboxy-2,5-dihydro-5-oxo-2-furanacetic acid_169.01317_2.016		145150	128410	131672	17.04	147636	149920	141450	17.16	0.12	8.3082
Sebacic acid_201.1133_6.774		457487	432654	770645	19.03	666957	520885	327740	18.89	-0.14	1.34526	4-one_155.10666_8.901		2.436e+06	4.98266e+06	7.56148e+06	22.1	4.33341e+06	4.66389e+06	1.78212e+06	21.66	-0.44	1.89076
[Similar to: L-Tyrosine; ΔMass: -0.0831 Da]_179.98352_1.024		113284	40651.7	83041.6	16.15	51834.2	166711	178404	16.82	0.67	2.4519	Botryosphaerilactone A_273.16973_9.027		144300	211283	2.1652e+06	18.62	4.48676e+06	2.81453e+06	2.08378e+06	21.5	2.88	11.7977
4-[Amino(carboxy)methyl]-5-oxoproline_201.05251_1.445		876988	2.39063e+06	1.11312e+06	20.34	507997	415665	366689	18.7	-1.64	43.2077	Traumatin_213.14844_11.802		2.79092e+06	1.38803e+06	713082	20.42	3.76236e+06	3.2202e+06	969800	21.12	0.7	2.20467
Asarone_207.10269_9.958		599640	608580	574618	19.18	602267	488382	541195	19.05	-0.13	4.58671	N~6~-[(2R)-3,4-Dihydro-2H-pyrrol-2-ylcarbonyl]-L-lysine_242.1498_1.631		3.06849e+06	1.12769e+06	1.01032e+07	21.64	4.63211e+06	9.84588e+06	1.47876e+07	23.06	1.42	4.13097
Artemotil_311.18665_10.507		139032	181998	86131.1	16.98	89632.3	142865	100526	16.73	-0.25	1.86409	oxiracetam_159.0764_2.429		2.43379e+06	1.97513e+06	8.29048e+06	21.7	1.85812e+06	3.76425e+06	1.19682e+07	22.06	0.36	1.34616
Glycyl-L-asparaginyl-D-leucine_301.15182_1.607		912828	663459	693289	19.51	740811	550951	855591	19.43	-0.08	1.3768	Sorbistin B_384.19608_5.039		4.19799e+06	777860	2.74789e+06	20.99	3.02125e+06	3.04276e+06	2.72569e+06	21.48	0.49	1.86215
[Similar to: 2'-Deoxyinosine; ΔMass: 17.0518 Da]_328.15152_1.485		1.24651e+06	174581	671542	19.01	668639	261212	749758	18.95	-0.06	1.0427	QS6350000_149.10726_1.278		2.0828e+06	255501	3.92622e+06	20.29	263310	286462	2.98882e+06	19.22	-1.07	1.80891
4-Methyleneglutamic acid_158.04594_0.913		400414	60607	1.4372e+06	18.32	206003	126830	447616	17.79	-0.53	1.36679	LQ1825000_145.13356_2.144		1.53665e+07	1.49428e+06	1.89034e+06	21.74	1.00584e+06	1.05055e+06	1.77887e+06	20.24	-1.5	4.1295
Picein_297.09806_7.799		168932	383381	161635	17.74	36873.2	78909.5	97886.4	16.01	-1.73	23.681	Diprotin B_328.22333_5.872		1.12341e+06	4.06925e+06	2.44067e+06	21.09	4.6371e+06	8.00375e+06	3.11661e+06	22.22	1.13	5.95905
1-Stearoyl lysophosphatidic acid_437.26759_15.505		16315.1	1.37168e+06	14547.7	16.07	731105	1.03896e+06	30937.4	18.13	2.06	2.05078	Benzyl succinate_299.1279_8.995		412479	3.13243e+06	295994	19.47	52519.2	45564.3	1.24791e+06	17.14	-2.33	3.52242
[Similar to: (1R,9R)-5-Cyclohexyl-N-isopropyl-6-oxo-7,11-diazatricyclo[7.3.1.02,7]trideca-2,4-diene-11-carboxamide; ΔMass: -39.1199 Da]_317.11441_7.269		244197	338437	193665	17.94	605631	67695	409566	17.97	0.03	1.01758	g-Butyrobetaine_146.11758_2.518		545569	3.36152e+06	423082	19.81	2.1713e+06	6.00466e+06	257920	20.51	0.7	1.45214
Cinnamic acid_147.04517_5.915		640847	175629	390769	18.43	182554	186172	262830	17.66	-0.77	3.99982	Propionic acid_190.10748_1.206		1.11586e+06	309652	4.79639e+06	20.17	3.43617e+06	5.76824e+06	5.6068e+06	22.2	2.03	6.31904
Butyryl-L-homoserine lactone_170.08235_5.116		188722	193142	166017	17.48	176350	262169	149610	17.54	0.06	1.23543	Allylamine_58.06511_0.878		4.01726e+06	6.07649e+06	2.09691e+06	21.82	721358	1.1196e+06	4.38944e+06	20.54	-1.28	4.38627
Acetoacetic acid, 2-hydroxyethyl ester methacrylate_213.07695_7.151		307405	218506	445117	18.24	3.49596e+06	895046	450122	20.1	1.86	8.78835	Toxopyrimidine_122.07114_0.92		210052	178121	185550	17.54	168889	177355	195869	17.46	-0.08	2.25563
[Similar to: Disperse red 17; ΔMass: -56.0703 Da]_287.07086_1.362		111904	17469.7	226612	16.22	19620.5	46772.4	243224	15.89	-0.33	1.19011	3,6,9,12-tetraoxatridecan-1-ol_209.13826_4.509		4.24308e+06	4.82712e+06	2.93499e+06	21.9	3.28764e+06	3.85901e+06	3.20058e+06	21.71	-0.19	2.17437
[Similar to: Equol; ΔMass: 45.0041 Da]_286.09108_1.834		49803.9	27934.6	54768.6	15.37	121074	316409	98474.8	17.25	1.88	28.2008	Gly-Ser_163.07135_0.778		1.26657e+06	641044	871912	19.77	989199	587177	1.17384e+06	19.75	-0.02	1.03388
MFCD00060079_215.05621_1.331		395851	313931	1.58815e+06	19.15	154431	221194	101882	17.21	-1.94	13.9171	(+)-castanospermine_190.10742_1.237		6.7785e+06	5.20031e+06	4.28058e+06	22.34	3.1331e+06	5.76824e+06	2.82412e+06	21.82	-0.52	4.23166
pro-met_245.09669_2.124		964086	394422	780000	19.35	1.11172e+06	564065	680766	19.52	0.17	1.35694	Furan_69.03353_1.629		5.39549e+06	1.97399e+07	1.40271e+07	23.45	8.1928e+07	4.16623e+07	1.34975e+06	23.99	0.54	1.26327
1,2-Cyclohexanediol_115.07648_6.085		153210	11788.7	494863	16.56	39502.3	19836.8	9701.12	14.26	-2.3	4.03462	N6-METHYLLYSINE_161.12837_0.866		1.09637e+07	421643	2.40019e+06	21.09	648651	333996	4.88961e+06	19.96	-1.13	1.77934
Phenobarbital_231.07755_5.884		294086	300788	267498	18.13	345467	372617	361862	18.46	0.33	170.678	epsilon-(gamma-Glutamyl)-lysine_276.15545_2.619		2.71836e+06	1.22155e+06	5.30478e+06	21.31	2.35427e+06	6.00755e+06	7.62523e+06	22.18	0.87	2.95669
L-dihydroanticapsin_200.09291_7.454		1.09831e+06	266740	1.49327e+06	19.53	1.96522e+06	1.5449e+06	1.62246e+06	20.7	1.17	4.84888	Hexylresorcinol_195.1379_10.095		1.25164e+06	6.43505e+06	1.10243e+06	20.98	2.18601e+06	5.6172e+06	3.86321e+06	21.79	0.81	2.34751
MFCD20640990_187.06117_1.631		303295	1.07362e+06	1.55593e+06	19.6	781996	698842	281353	19.03	-0.57	1.85765	Butylparaben_195.10155_10.849		190502	76686.2	1.35271e+06	18.04	3.96259e+06	1.96821e+06	1.87608e+06	21.22	3.18	14.9927
(+)-castanospermine_188.0929_4.98		501964	313909	294238	18.45	379176	285046	312274	18.3	-0.15	1.6561	FK409_216.09776_0.92		2.49693e+06	1.47835e+06	1.97219e+06	20.89	1.7095e+06	707120	1.6503e+06	20.26	-0.63	3.9044
[Similar to: Equol; ΔMass: 45.0904 Da]_286.17739_1.781		350526	109233	280343	17.75	63149.8	128314	325755	17.08	-0.67	2.10313	(4S)-4-[(2E)-2-Octenoyloxy]-4-(trimethylammonio)butanoate_286.20132_9.274		207108	288373	2.43892e+06	19.01	486339	209489	3.43092e+06	19.43	0.42	1.23545
N-oleoyl isoleucine_394.33282_16.522		156522	107272	345611	17.46	247779	156353	234787	17.67	0.21	1.40988	Alanyltryptophan_276.13438_3.398		1.10554e+06	5.14775e+06	1.39243e+06	20.93	2.22387e+06	746758	2.78009e+06	20.67	-0.26	1.26818
1228222_261.08827_5.675		179169	434636	129056	17.72	468225	313839	225912	18.29	0.57	2.5247	leucoline_130.06496_2.697		5.21668e+06	4.34562e+06	5.70604e+06	22.27	4.47646e+06	5.10046e+06	4.32592e+06	22.14	-0.13	2.52873
Catalpol_361.11421_6.046		17094.5	16524.3	306879	15.43	736047	435472	535497	19.08	3.65	16.3289	Gabapentin_172.13316_6.389		2.95172e+06	4.82934e+06	1.81872e+06	21.5	319746	1.80961e+06	2.39532e+06	20.09	-1.41	4.34796
Leptosphaerin_200.05658_0.893		283446	310500	3.18922e+06	19.32	2.3302e+06	93312.2	309994	18.63	-0.69	1.39202	Azacyclotridecan-2-one_198.18527_11.54		2.01471e+06	3.12099e+06	271980	20.19	94016.5	69285.3	404788	17.08	-3.11	12.4076
[Similar to: 2'-Deoxyinosine; ΔMass: 0.9970 Da]_252.07561_1.221		23225.3	205910	22851.2	15.55	30454	117367	19923.9	15.34	-0.21	1.1334	Tetraacetylethylenediamine_229.11827_4.159		8.97512e+06	8.00818e+06	7.10177e+06	22.93	1.02106e+07	8.88908e+06	4.72013e+06	22.85	-0.08	1.2126
4-Hydroxyprolylleucine_243.13508_2.531		1.16732e+06	609711	676657	19.58	604150	626330	946132	19.44	-0.14	1.4084	Sclerotiotide G_447.25925_7.892		1.34668e+06	1.1826e+06	5.99417e+06	21.02	1.03874e+07	2.16925e+06	7.28282e+06	22.38	1.36	4.00917
[Similar to: NP-002477; ΔMass: -241.2282 Da]_257.02153_0.793		70586.2	207786	318386	17.35	300593	199079	131506	17.6	0.25	1.3348	3-Vinylaniline_120.08063_2.861		1.38176e+07	1.16687e+07	1.21783e+07	23.58	9.29073e+06	9.32979e+06	1.80568e+07	23.47	-0.11	1.32377
Formiminoglutamic Acid_173.05687_0.912		778952	122929	387907	18.35	132576	144032	273632	17.4	-0.95	3.06451	Damascenone_191.14304_9.276		566942	65110	2.48068e+06	18.78	4.75383e+06	2.15626e+06	3.59597e+06	21.67	2.89	7.22622
Musacin A_245.10314_5.274		40389.1	146822	540990	17.17	1.12941e+06	1.12629e+06	573682	19.78	2.61	12.2257	Pyramidamycin C_183.07639_1.639		135057	875090	2.28969e+06	19.3	191794	169323	5.13725e+06	19.07	-0.23	1.09481
MFCD00037764_176.05643_0.777		141762	74080.7	145047	16.81	119704	66786.1	40128.4	16.06	-0.75	4.02088	2,2-Di(tert-amylperoxy)butane_263.22171_11.582		2.3127e+06	1.91392e+06	989451	20.64	844918	917300	1.09683e+06	19.85	-0.79	8.95632
cartazolate_289.16576_7.199		58754.8	252356	306068	17.34	113679	86004.4	203690	16.94	-0.4	1.51419	b-Ala-Lys_218.14981_0.732		2.34619e+06	1.74715e+06	2.33085e+06	21.02	1.23308e+06	2.24127e+06	4.76403e+06	21.17	0.15	1.24391
L-(-)-methionine_148.04381_2.187		983973	1.0834e+06	1.12458e+06	20.02	577432	893807	1.10678e+06	19.66	-0.36	3.63658	Levetiracetam_171.11278_6.269		3.46189e+06	1.44439e+06	2.9654e+06	21.23	1.98004e+06	1.76935e+06	2.75146e+06	21.02	-0.21	1.52114
(E)-Ferulic acid_193.05067_6.859		556154	256670	110579	17.94	471279	66248.1	271167	17.64	-0.3	1.25798	imazamox_306.14499_4.981		196713	2.13942e+06	2.04174e+06	19.86	6.11779e+06	1.31196e+06	1.13358e+06	20.99	1.13	2.19162
ascr#6.1_247.15507_6.449		94935.6	194533	122775	17	26111.4	25654.6	70069.7	15.14	-1.86	33.1192	(2E)-3-(Carbamimidoylsulfanyl)acrylic acid_147.02234_0.878		1.5323e+06	369569	5.58631e+06	20.49	7.06869e+06	1.24182e+06	1.10268e+07	22.13	1.64	3.03062
1,2-Cyclohexanediol_97.06586_5.115		367451	162809	208762	17.82	142591	125708	26215.2	16.25	-1.57	7.12738	2-Methyl-3-thioacetoxy-4,5-dihydrofuran_176.0739_2.598		2.57073e+06	4.33747e+06	602659	20.85	1.39298e+06	723379	784346	19.82	-1.03	3.14876
UQ1355000_169.12342_8.619		85069.2	273117	65145.6	16.81	207782	214979	47476.2	16.97	0.16	1.14435	[Similar to: PEG n8; ΔMass: 0.9955 Da]_372.22309_6.03		1.66078e+06	1.95902e+06	1.22223e+06	20.6	2.12879e+06	2.33244e+06	1.68527e+06	20.95	0.35	4.63947
Butenylcarnitine_228.12428_7.657		185229	449771	175082	17.9	228815	394676	214280	18.03	0.13	1.23864	L-(+)-Aspartic acid_134.04477_1.015		6.29974e+06	3.30729e+06	1.87436e+07	22.8	3.71585e+06	1.12448e+07	1.46646e+07	23.02	0.22	1.20381
Gln-Asp-Val-Leu_472.24165_5.517		302980	218097	356601	18.13	135196	341553	641951	18.24	0.11	1.13658	LQ1825000_169.13359_1.299		2.94357e+06	1.14729e+06	1.46542e+06	20.7	1.21339e+06	1.10939e+06	2.58376e+06	20.53	-0.17	1.28581
NS1800000_182.04599_2.012		339144	125807	504773	18.09	178490	125141	238312	17.41	-0.68	2.76245	(10E,15Z)-9,12,13-Trihydroxy-10,15-octadecadienoic acid_351.21444_9.66		2.33945e+06	5.14888e+06	1.89576e+06	21.44	3.77642e+06	2.54972e+06	2.88795e+06	21.53	0.09	1.17654
Vitamin C_175.02482_7.715		9401.76	8585.94	232412	14.7	204209	195030	274344	17.76	3.06	8.10787	Embelin_295.19049_13.025		1.44525e+06	1.20779e+06	5.32211e+06	21	8.76087e+06	7.40368e+06	4.53447e+06	22.66	1.66	11.6638
Deferiprone_138.05608_1.269		818966	750054	251759	19.03	801848	650470	486257	19.27	0.24	1.41737	(4S)-4-[(6-Carboxyhexanoyl)oxy]-4-(trimethylammonio)butanoate_304.17697_4.228		2.56353e+06	3.74726e+06	2.31466e+06	21.42	2.86332e+06	3.1873e+06	2.02488e+06	21.33	-0.09	1.29231
[Similar to: N-Cyclohexyl-2-{(3R,4S)-3-[(5-phenyl-1,2-oxazol-3-yl)methyl]-4-piperidinyl}acetamide; ΔMass: 46.9847 Da]_427.219_5.304		444647	651735	394027	18.89	541348	529423	493669	18.99	0.1	1.49893	Rimexolone_371.25823_9.231		4.95795e+06	3.78441e+06	4.10546e+06	22.02	2.9348e+06	3.24836e+06	3.72e+06	21.65	-0.37	14.2335
2,6-Dideoxy-3-O-methyl-L-arabino-hexopyranose_161.08193_4.713		178892	94062.8	357475	17.47	1.02449e+06	294047	101391	18.25	0.78	1.91788	1228222_263.10266_5.043		1.68415e+06	4.54656e+06	1.36781e+06	21.06	4.14183e+06	2.0768e+06	2.43048e+06	21.39	0.33	1.62111
Phomoenamide_283.16648_7.973		223204	383127	124163	17.75	254706	308620	304198	18.14	0.39	2.17528	Butenylcarnitine_230.1387_2.011		3.91842e+06	178780	187508	18.96	227196	208727	198271	17.69	-1.27	2.28177
[Similar to: NP-015285; ΔMass: 0.1166 Da]_415.22009_5.138		560612	284212	543628	18.76	142140	196274	783129	18.09	-0.67	2.15295	(11E)-15-Oxo-11-icosenoic acid_325.27396_13.885		1.74281e+06	1.14695e+07	1.93295e+06	21.69	6.10756e+06	7.20354e+06	3.26326e+06	22.32	0.63	1.84465
(E)-3-O-Methyl entacapone_318.10971_5.334		265826	180320	196061	17.69	449201	446317	304731	18.59	0.9	43.1984	3-pyridin-1-ium-1-ylpropane-1-sulfonate_202.05355_3.644		3.4412e+06	213121	4.43671e+06	20.5	364138	334806	3.46805e+06	19.52	-0.98	1.63446
L-coprine_403.18356_1.843		599951	45469.9	539543	17.9	19236.3	77206.8	713795	16.64	-1.26	1.81517	Phenelzine_137.10727_1.058		831390	593946	945792	19.57	251130	1.07967e+06	1.44887e+06	19.48	-0.09	1.0836
Alanyltryptophan_274.11986_4.931		81443.7	367744	107995	17.17	345871	230561	188226	17.91	0.74	2.77282	melanostatin_285.19216_5.432		179867	2.60077e+06	135464	18.6	3.0291e+06	1.69198e+06	289127	20.12	1.52	2.36741
GIBBERELLIN A8-CATABOLITE_361.12964_6.411		8755.26	38389.2	7854.95	13.75	13061.2	15472	10206.7	13.64	-0.11	1.13221	leu-gly-leu_302.20754_2.715		3.98142e+06	2.4482e+06	3.39236e+06	21.61	1.09394e+06	1.87786e+06	4.34587e+06	20.98	-0.63	2.7507
Leu-pro_227.14019_4.423		1.11257e+06	489071	629290	19.42	1.00128e+06	834409	598447	19.6	0.18	1.46658	ALA-PRO_187.10767_3.01		3.15863e+06	1.38599e+06	6.0492e+06	21.51	2.07875e+06	5.43035e+06	5.60236e+06	21.93	0.42	1.62014
(2S)-3-Hydroxy-1,2-propanediyl dibutanoate_231.12379_8.035		523139	679693	331017	18.9	543813	558259	336600	18.83	-0.07	1.15144	Pirbuterol_241.15469_5.288		2.34787e+06	2.92495e+06	1.97306e+06	21.18	2.75059e+06	1.89633e+06	1.95178e+06	21.05	-0.13	1.6817
Gly-Ser_161.05691_1.012		120274	53453.1	143578	16.57	276871	55749.4	99464.8	16.82	0.25	1.28769	Indobufen_296.12817_6.68		1.50006e+06	1.10529e+06	832498	20.09	576611	1.40782e+06	445793	19.44	-0.65	3.18616
Thiirane_105.00156_7.292		8388.6	12679.2	9184.07	13.28	15503.7	11059.9	7704.59	13.42	0.14	1.44149	2-(2-Ethoxyethoxy)ethanol_135.10155_2.901		517333	363138	1.72381e+06	19.39	1.23318e+06	2.83102e+06	2.0572e+06	20.88	1.49	8.12823
Valyl-4-hydroxyproline_229.11949_5.456		112221	35341.2	211593	16.53	134618	469058	301698	18.03	1.5	5.60055	[Similar to: 9-Oxo-ODE; ΔMass: -0.0362 Da]_295.19059_13.653		257913	637264	5.57477e+06	19.89	9.18213e+06	8.7972e+06	5.8194e+06	22.89	3	11.4431
apronalide_183.1139_2.862		196789	15358.6	143995	16.21	79765.3	289655	98595	17.01	0.8	1.74906	1-(1H-Imidazo[4,5-c]pyridin-4-yl)ethanone_162.06613_2.283		3.87489e+06	2.92472e+06	3.87014e+06	21.75	277066	2.1802e+06	4.89885e+06	20.45	-1.3	2.81588
FK409_214.0836_0.902		221396	107074	154879	17.24	36717.3	37685.6	51229.8	15.34	-1.9	198.926	Pirbuterol_241.1546_5.935		5.01074e+06	3.68127e+06	5.35179e+06	22.14	3.4272e+06	2.26368e+06	5.21247e+06	21.71	-0.43	3.05273
alpha-Ketoglutaric acid_145.01428_5.994		27848.4	23074.2	88511.6	15.23	698881	402347	664572	19.12	3.89	245.519	Butyryl-L-homoserine lactone_360.21313_4.568		2.30488e+06	2.32148e+06	1.23236e+06	20.84	908287	806386	1.64371e+06	20.02	-0.82	7.35808
Histidylphenylalanine_301.12933_6.976		9452.11	18560.2	286428	15.17	502898	256352	418548	18.53	3.36	10.6749	Hexylresorcinol_389.26892_10.361		2.43204e+06	6.31329e+06	2.28309e+06	21.64	1.9598e+06	2.36801e+06	1.77106e+06	20.94	-0.7	4.38758
3-(acetamidomethylidene)-2-(hydroxymethyl)succinic acid_216.05139_1.29		559737	338586	95902.7	18	79715.7	63496.4	260888	16.74	-1.26	3.7013	[Similar to: Glycyl-L-leucine; ΔMass: 0.8774 Da]_190.00075_1.721		573015	513357	516928	19.03	426621	417974	486205	18.76	-0.27	29.3229
Cordycedipeptide A_226.11984_3.156		425576	348563	397413	18.57	589592	519079	432043	18.96	0.39	15.0247	Synaptamide_372.2898_9.576		285230	1.47151e+06	283325	18.91	319326	63968	118173	17.03	-1.88	6.85288
[Similar to: Equol; ΔMass: 45.9472 Da]_287.03421_1.912		322948	135578	267515	17.79	222417	160051	272304	17.7	-0.09	1.1812	Dnacin B1_389.18243_6.407		264119	2.72971e+06	3.14968e+06	20.33	3.23141e+06	3.04336e+06	201721	20.26	-0.07	1.02853
PC(P-14:0/0:0)_450.29765_8.889		60395.2	166431	40434.4	16.18	44533	39633.2	21646.5	15.04	-1.14	5.76034	Lauric acid, monoester with triethanolamine_332.27981_12.081		1.11714e+06	2.12468e+06	126684	19.35	3.67751e+06	3.39864e+06	1.05471e+06	21.17	1.82	3.95606
Ethanal tetramer_175.09763_2.064		407464	494008	366438	18.68	293553	482745	284471	18.39	-0.29	2.82391	ser-arg_262.15098_0.747		319704	534712	694037	18.91	550343	1.38215e+06	1.96771e+06	20.13	1.22	7.75128
Tripropyl citrate_317.16069_6.101		13395.4	11932.7	252603	15.07	664496	458318	606675	19.12	4.05	20.3923	Spiroxamine_298.27414_11.899		217665	1.97296e+06	126078	18.53	2.53402e+06	2.7783e+06	612716	20.63	2.1	4.80908
Ethyl 3-O-beta-D-glucopyranosyl-butanoate_293.1243_3.713		23471.9	18541.8	681977	16.03	188392	203937	262329	17.72	1.69	2.69143	4-{(Z)-[(5E,8Z,11Z,14Z)-1-Hydroxy-5,8,11,14-icosatetraen-1-ylidene]amino}butanoic acid_390.30063_9.971		35334.5	2.01124e+06	39309.8	17.1	42781.3	40588.1	32090.1	15.22	-1.88	2.61124
[Similar to: N-Acetylvaline; ΔMass: 0.8964 Da]_158.97868_10.178		1.16043e+06	591127	655777	19.55	9.55504e+06	6.34593e+06	841267	21.82	2.27	8.83267	[Similar to: 2-{[(2R,3R,4S,5S,6R)-4,5-dihydroxy-6-(hydroxymethyl)-3-{[(2S,3R,4R,5R,6S)-3,4,5-trihydroxy-6-methyloxan-2-yl]oxy}oxan-2-yl]oxy}-2-(4-hydroxyphenyl)acetonitrile; ΔMass: 107.0961 Da]_565.26178_4.804		1.75648e+06	221391	3.1765e+06	20.03	1.95722e+06	1.394e+06	3.75354e+06	21.05	1.02	2.18596
Linamarin_246.0984_5.056		885033	67859.3	249150	17.91	277738	279676	123707	17.7	-0.21	1.1618	Kinoprene_277.21628_9.851		3.16107e+06	7.09341e+06	2.33337e+06	21.83	6.28924e+06	4.93867e+06	2.78962e+06	22.08	0.25	1.42288
Sclerotiorumin C_271.13028_1.608		193900	159509	85545.2	17.08	112601	133297	128258	16.92	-0.16	1.43761	3-Vinylaniline_120.08068_5.884		3.33164e+06	2.70468e+06	5.46852e+06	21.81	3.87297e+06	4.03416e+06	7.12388e+06	22.2	0.39	2.51681
Leu-Val_229.15579_6.417		351292	330284	581652	18.64	302109	203426	356106	18.09	-0.55	5.01532	Butylparaben_195.10163_9.369		562273	1.54105e+06	2.91726e+06	20.38	5.11031e+06	2.34901e+06	2.81779e+06	21.62	1.24	5.54001
isopropylmalic acid_175.06125_3.909		1.6689e+06	903138	1.02046e+06	20.14	2.14749e+06	1.28439e+06	938974	20.39	0.25	1.66632	Furan_69.03352_5.086		4.10027e+06	3.76015e+06	3.21324e+06	21.81	2.55452e+07	1.10452e+07	8.15002e+06	23.65	1.84	46.5679
leu-gly-leu_300.19296_2.796		248022	144223	53495.1	16.92	31895.1	11954	309092	15.58	-1.34	2.31832	UNII:Z5JO63XGNK_263.20069_13.586		1.453e+06	845843	753696	19.89	274184	198228	1.16468e+06	18.6	-1.29	5.0418
afegostat_128.07182_1.884		570210	435874	434493	18.86	293158	96497.9	927634	18.18	-0.68	1.94504	nylon cyclic dimer_227.1754_4.558		1.22315e+06	943248	961177	19.98	1.1389e+06	1.64352e+06	1.92553e+06	20.55	0.57	11.0958
Dnacin B1_387.16743_6.205		529698	285227	372845	18.55	348391	329202	760645	18.76	0.21	1.47873	[Similar to: 2-{[(2R,3R,4S,5S,6R)-4,5-dihydroxy-6-(hydroxymethyl)-3-{[(2S,3R,4R,5R,6S)-3,4,5-trihydroxy-6-methyloxan-2-yl]oxy}oxan-2-yl]oxy}-2-(4-hydroxyphenyl)acetonitrile; ΔMass: -157.9733 Da]_300.19243_5.159		2.95063e+06	1.95662e+06	2.23796e+06	21.16	2.17777e+06	741757	4.71466e+06	20.91	-0.25	1.30779
[Similar to: N-Acetyl-L-phenylalanine; ΔMass: 0.9875 Da]_207.06968_6.611		32341.8	265558	37007.2	16.06	139532	197479	23115.9	16.39	0.33	1.2202	[Similar to: (3E,12E)-3,12-Dimethyl-8-methylene-6,18-dioxatricyclo[14.2.1.05,9]nonadeca-3,12,16(19)-triene-7,17-dione; ΔMass: -124.0161 Da]_205.15847_13.589		1.07903e+06	922019	160883	19.05	251086	98050.9	848096	18.07	-0.98	2.08274
2-Ethylhexyl sulfate_209.08533_5.737		6454.89	27398	5841.65	13.3	12713.2	8533.05	6667.76	13.13	-0.17	1.19805	Cxa-10_328.24841_11.039		2.84041e+06	1.39179e+06	1.00082e+06	20.59	3.83226e+06	513861	1.70415e+06	20.51	-0.08	1.06643
Pyrinuron_271.08231_2.766		15590.8	678155	376367	17.27	50030.6	29106.3	57963.7	15.42	-1.85	2.92982	Butenylcarnitine_230.13869_2.531		4.26142e+06	134831	241668	18.98	190945	200074	198879	17.58	-1.4	2.40672
Sclerotiorumin C_271.13013_1.788		750958	456642	363101	18.93	380053	415705	533742	18.74	-0.19	1.63071	butalbital_225.12338_5.224		2048099	3.54507e+06	3.13997e+06	21.44	3.73211e+06	1.85597e+06	2.95207e+06	21.38	-0.06	1.11425
Vigabatrin_188.09294_0.929		131297	44867.4	42969.5	15.95	30289.7	137108	26389.6	15.55	-0.4	1.45731	Rolofylline_357.22745_9.703		58633.2	137191	1.74989e+06	17.88	1.86139e+06	2.25559e+06	1.67093e+06	20.87	2.99	8.82948
Chlorobenzene_111.0007_8.931		65466.7	16716.4	11752.4	14.52	17436.4	17103.5	11402.9	13.88	-0.64	2.17859	Phloionolic acid_333.26382_9.611		358211	95559.6	1.64283e+06	18.55	150427	145326	106622	17.02	-1.53	3.70678
Leu-pro_227.1402_4.996		488081	297253	344601	18.49	448323	352670	433148	18.64	0.15	1.78736	Cyclo-(Ile-Ser)_201.12335_3.281		3.27407e+06	5.1738e+06	3.02424e+06	21.82	3.77484e+06	5.68133e+06	5.39324e+06	22.22	0.4	3.73702
[Similar to: 2-[(2-{[(Benzyloxy)carbonyl]amino}-3-methylpentanoyl)amino]acetic acid; ΔMass: -109.0415 Da]_212.10413_1.463		308431	229548	222370	17.94	306695	319990	251292	18.15	0.21	3.25086	Artemether_299.18546_10.563		1.04902e+06	935783	862832	19.85	4.95502e+06	3.95238e+06	5.55239e+06	22.19	2.34	6802.72
[Similar to: NP-018660; ΔMass: 45.9693 Da]_271.11889_7.095		14679	92512.7	311861	16.2	426226	372373	295507	18.46	2.26	6.47798	Isononadecasphinganine_316.32107_13.474		537863	3.16589e+06	120784	19.17	237109	691755	435410	18.66	-0.51	1.35022
leu-gln_258.14598_3.374		16217.1	12173.4	355660	15.33	25536.9	21258.7	552876	16.03	0.7	1.30772	D-Lysine lactam_129.10218_5.071		7.55027e+06	5.11821e+06	1.0808e+07	22.83	2.21573e+06	3.44359e+06	1.59488e+07	22.24	-0.59	1.80762
[Similar to: NP-018949; ΔMass: 0.9777 Da]_382.15433_4.916		266032	160227	200675	17.64	255159	163618	274931	17.78	0.14	1.4771	[Similar to: NP-009832; ΔMass: 39.0433 Da]_262.11865_3.275		3.92429e+06	7.73091e+06	1.31079e+06	21.7	104424	504197	1.92626e+06	18.83	-2.87	8.75021
[Similar to: N~1~-[2,6-dinitro-4-(trifluoromethyl)phenyl]ethane-1,2-diamine; ΔMass: 7.1427 Da]_300.19302_5.566		108858	31037.9	163212	16.32	36798.3	75599.1	377457	16.63	0.31	1.2298	(-)-Prostaglandin E2_353.23233_9.581		34762.2	120253	2.17997e+06	17.67	502341	51266.1	1.26478e+06	18.28	0.61	1.25305
MFCD00025555_201.12455_4.348		434698	454028	352008	18.65	454386	314837	365145	18.51	-0.14	1.95113	Tyramine_120.08064_6.53		2.45515e+06	3.5839e+06	3.72633e+06	21.61	1.35433e+06	1.12606e+06	3.50902e+06	20.74	-0.87	5.44197
Vigabatrin_128.07172_1.89		570210	435874	434493	18.86	293158	96497.9	927634	18.18	-0.68	1.94504	16-feruloyloxypalmitic acid_449.28793_15.245		6.98336e+06	5.17018e+06	1.03912e+07	22.78	1.09595e+06	2.43814e+06	2.74087e+06	20.89	-1.89	49.2102
cinitapride_401.21839_8.986		41319.8	74703.5	429839	16.75	734174	354022	513248	18.96	2.21	9.58212	DL-Glutamic acid_148.06044_1.74		8.82139e+06	6.13983e+06	6.60889e+06	22.76	4.36667e+06	4.79326e+06	6.75798e+06	22.31	-0.45	6.76617
2-Hydroxy-N-{2-[2-(1H-imidazol-5-yl)ethyl]-5-methyl-3-oxo-1,2-oxazolidin-4-yl}benzamide_329.12442_6.43		19485.5	44703.6	273438	15.92	724220	323031	130160	18.25	2.33	6.44941	leu-gln_260.16052_3.272		129085	102852	2.72016e+06	18.33	142619	382906	4.33625e+06	19.24	0.91	1.44796
[Similar to: 2-[(2-{[(Benzyloxy)carbonyl]amino}-3-methylpentanoyl)amino]acetic acid; ΔMass: -107.0734 Da]_214.07222_1.371		1.13104e+06	838391	308257	19.34	62773.2	181055	56927.7	16.4	-2.94	51.1326	Arachidonoylmorpholine_374.30545_10.679		415082	1.09163e+06	69143.6	18.27	257857	85292.6	56766.5	16.72	-1.55	3.21922
[Similar to: NP-018949; ΔMass: 0.0377 Da]_381.21437_5.028		423463	237316	208320	18.07	47539.2	299026	295106	17.3	-0.77	2.19726	2-Methoxy-3-methylpyrazine_125.07085_1.374		1.99612e+06	757618	1.65628e+06	20.37	784586	221589	1.97448e+06	19.42	-0.95	2.51559
3,5-Dioxooctanedioic acid_201.04071_1.345		511377	1.05643e+06	1.2604e+06	19.75	952150	1.02584e+06	1.01329e+06	19.93	0.18	1.47938	N~6~-[(2R)-3,4-Dihydro-2H-pyrrol-2-ylcarbonyl]-L-lysine_242.14989_3.606		1.24993e+06	1.80517e+06	495912	19.99	959630	1.89579e+06	1.04606e+06	20.24	0.25	1.4125
(+)-castanospermine_188.09291_2.404		227730	165809	226475	17.64	165387	91700.9	170176	17.07	-0.57	6.51054	Amide C18_316.32117_13.41		537863	2.06336e+06	122470	18.97	90839.8	105361	435410	17.3	-1.67	3.43245
acetyl triethyl citrate_317.12436_6.045		68203.5	160619	777907	17.64	1.18215e+06	818746	428186	19.51	1.87	5.92031	n-Amylbenzene_149.13252_13.589		1.26285e+06	1.19104e+06	197785	19.35	801378	791053	175735	18.88	-0.47	1.42905
Armillariol B_205.10815_6.695		12270.8	254340	10113.7	14.95	169619	153589	11942.8	16.05	1.1	1.65465	[Similar to: Oleamide; ΔMass: 280.9864 Da]_282.13641_15.365		461403	1.52259e+06	708777	19.6	1.05011e+06	211742	969608	19.19	-0.41	1.47188
carbazeran_359.17139_6.938		44619.6	46248.6	419055	16.54	736573	451108	487960	19.06	2.52	12.1527	[Similar to: 13(S)-HOTrE; ΔMass: -18.0856 Da]_277.14117_10.742		1.09948e+06	987461	7.51739e+06	20.94	6.23277e+06	6.07977e+06	9.41146e+06	22.76	1.82	7.3888
Hydroxylysine_161.0932_0.853		117369	179408	55258.1	16.68	92365.7	37925	97123.4	16.09	-0.59	2.36117	13(S)-HpOTrE_293.21155_8.356		1.76734e+06	4.73094e+06	1.78864e+06	21.23	3.9307e+06	3.96084e+06	1.37053e+06	21.4	0.17	1.22353
Benzyl succinate_297.1134_7.704		6562.35	5992.91	5859.1	12.58	8904.01	6926.03	5384.47	12.76	0.18	2.17228	anthramycin_316.12929_5.208		1.06695e+06	2.93641e+06	580539	20.22	2.6932e+06	1.17009e+06	459357	20.11	-0.11	1.08909
Oxybis(methyl-2,1-ethanediyl) diacrylate_241.10831_5.588		168655	590290	26107.2	17.07	52585.3	37289.6	39875.5	15.38	-1.69	3.70957	N-Acetylvaline_201.12332_3.266		3.27407e+06	5.1738e+06	3.02424e+06	21.82	3.77484e+06	5.68133e+06	5.39324e+06	22.22	0.4	3.73702
Nitrosoguvacoline_169.062_1.48		141220	284278	524004	18.07	243045	467029	334173	18.36	0.29	1.50038	[Similar to: L-Tyrosine; ΔMass: 17.9086 Da]_199.98975_0.946		243792	1.76979e+06	770383	19.4	1.13643e+06	1.33234e+06	357937	19.64	0.24	1.20577
Dodecanedioic acid_229.14463_7.832		1.92875e+06	214074	240257	18.82	300656	245076	126668	17.68	-1.14	2.78781	Butabarbital_115.57848_0.72		645924	486342	665205	19.18	103930	1.00384e+06	1.01748e+06	18.85	-0.33	1.27792
MFCD00025555_201.12451_3.015		201873	196819	150266	17.47	51854.5	37164.7	73236.2	15.67	-1.8	219.25	his-asn_270.11974_0.727		1.41844e+06	778357	949789	19.95	1.00468e+06	642683	972735	19.71	-0.24	2.02126
anticapsin_198.0773_5.393		529844	534110	236353	18.63	643092	499347	494051	19.05	0.42	2.71904	2,6-Diamino-4-hexenoic acid_145.09721_0.726		1.93356e+06	3.02261e+06	1.59231e+06	21	1.22932e+06	646456	1.62085e+06	20.05	-0.95	8.47723
Leu-Leu_243.17146_7.08		79492.8	232669	224539	17.29	20831	160984	229306	16.48	-0.81	1.87383	DL-Carnitine_162.11256_0.836		2.50553e+06	1.97366e+06	2.3457e+06	21.11	530494	1.01399e+06	2.59775e+06	20.09	-1.02	4.87524
[Similar to: Disperse red 17; ΔMass: -56.0161 Da]_287.1251_1.619		275205	229219	239997	17.92	118930	59988.7	282198	16.95	-0.97	4.75107	F1839-B_432.23834_10.66		644061	1.32212e+06	1.46192e+06	20.04	233374	201276	153499	17.56	-2.48	258.866
Lorbamate_257.15088_5.958		249062	221967	299587	17.96	147722	137560	361753	17.57	-0.39	2.22611	[Similar to: PEG n6; ΔMass: 0.9853 Da]_284.16046_4.843		2.29907e+06	576011	2.88325e+06	20.58	2.6797e+06	941933	1.77879e+06	20.65	0.07	1.07382
Hippuric acid_178.05103_7.95		229492	42736.1	121652	16.69	222032	326195	130485	17.69	1	3.52674	Sclerotiotide B_204.13607_2.507		187017	880360	814861	18.97	78091.1	375222	1.6049e+06	18.46	-0.51	1.33997
alpha-Ketoglutaric acid_145.01424_3.138		23360.3	10277.8	264160	15.28	729066	486647	522325	19.12	3.84	18.6258	prohydrojasmon_255.19529_10.898		2.55376e+06	5.38132e+06	1.45918e+06	21.37	1.12678e+06	748818	1.11123e+07	21.01	-0.36	1.25513
Phenobarbital_231.07756_6.83		194846	59010	82966.6	16.59	97900.6	132214	166735	16.98	0.39	1.91952	MFCD00672375_91.04454_0.696		457302	383441	462426	18.72	1.6968e+06	1.04006e+06	288281	19.61	0.89	3.18507
Phosphoarginine_253.0719_2.334		15951.1	418521	229317	16.81	21297.6	18260	15523	14.15	-2.66	7.08456	Lovastatin_405.26385_8.949		1.90613e+06	1.25995e+06	1.49464e+06	20.55	3.84337e+06	1.22806e+06	1.17008e+06	20.75	0.2	1.34795
4-Aminopyridine_93.04578_1.158		64789.8	14128.9	22236.7	14.74	21399.7	17635.7	15488.8	14.14	-0.6	2.3918	1H-Benzotriazole, 4,5,6,7-tetrahydro-_124.08686_19.077		585259	692928	501811	19.17	188350	183951	17340.8	16.36	-2.81	14.0038
Cordycedipeptide A_226.1199_2.404		202129	210818	196583	17.63	233575	322230	215245	17.95	0.32	6.53697	[Similar to: DL-Arginine; ΔMass: 174.0532 Da]_349.1722_0.728		1.11407e+06	776970	561800	19.58	569682	360144	432545	18.77	-0.81	13.1308
(+)-castanospermine_188.09293_5.584		388279	255093	230408	18.11	290645	194598	373987	18.08	-0.03	1.08257	Byrsonic acid_457.35303_14.832		1.38504e+06	3.61146e+06	2.51297e+06	21.15	977406	2.2503e+06	512771	19.99	-1.16	5.235
O-propenoyl-D-carnitine_214.10851_7.054		529474	173378	273737	18.16	636439	355759	353004	18.72	0.56	2.73539	gln-trp_333.15608_4.807		136069	2.06301e+06	983949	19.31	154365	1.03383e+06	1.02513e+06	19.06	-0.25	1.14482
[Similar to: 2-(4-Methyl-3-cyclohexen-1-yl)-2-propanyl 6-O-(6-deoxy-α-L-mannopyranosyl)-β-D-glucopyranoside; ΔMass: -300.2403 Da]_160.99893_1.138		39636.4	36282.9	35188.2	15.17	60802.2	47376.5	44784.2	15.62	0.45	27.7024	Tomaymycin_305.14966_5.656		1.78228e+06	911679	831583	20.08	988023	479072	922052	19.53	-0.55	3.11308
MFCD09953737_230.10353_4.757		330692	342903	254996	18.23	289629	252913	279201	18.06	-0.17	3.12812	asn-phe_280.12929_3.4		113669	88853.8	2.38608e+06	18.14	384976	2.05299e+06	3.38539e+06	20.4	2.26	3.62206
[Similar to: (1R,9R)-5-Cyclohexyl-N-isopropyl-6-oxo-7,11-diazatricyclo[7.3.1.02,7]trideca-2,4-diene-11-carboxamide; ΔMass: -39.0373 Da]_317.19705_8.024		37831	136596	12115.9	15.28	14939.2	17271.6	101428	14.86	-0.42	1.29759	2-Isopropyl-3-methoxypyrazine_153.10226_4.011		3.38245e+06	1.18201e+06	2.3919e+06	21.02	889419	1.04819e+06	2.73565e+06	20.38	-0.64	2.5047
2-Hydroxy-3,4,5-trimethoxybenzoic acid_227.05621_3.728		8364.65	239447	187486	16.14	13065.6	18170	31633.2	14.26	-1.88	3.27599	3-Vinylaniline_120.08064_4.838		3.77593e+06	3.1269e+06	3.78468e+06	21.76	4.0286e+06	3.31903e+06	4.69833e+06	21.92	0.16	2.54289
Valproic acid_203.129_7.845		123193	180070	93754.7	16.96	147162	148173	71816	16.83	-0.13	1.29436	(+)-cassaine_406.29544_8.934		46626.5	1.32222e+06	46901.2	17.12	61572.3	58273.8	42213.5	15.7	-1.42	2.32709
Phenylglyoxylic acid_149.02444_2.419		349431	69972.4	179484	17.32	204123	218613	210197	17.69	0.37	1.62219	5-Nitro-2-propoxyaniline_197.09201_3.872		3.84935e+06	970355	3.47078e+06	21.16	110023	560430	3.70226e+06	19.22	-1.94	3.4337
N-stearoyl proline_380.31721_16.142		18833	47554.5	74609.5	15.31	28476.4	27292.9	71788.3	15.22	-0.09	1.09592	HC blue 2_286.13987_3.259		2.15437e+06	1.96796e+06	1.07317e+06	20.66	1.48922e+06	1.59783e+06	1.39208e+06	20.51	-0.15	1.5174
4-(5,6-Dihydroxy-6-methyl-1-hepten-2-yl)-1-methyl-1,2-cyclohexanediol_271.19165_7.741		212162	5681.01	97759.8	15.58	40036	9914.62	43074	14.65	-0.93	1.61234	bendiocarb_224.09178_2.929		1.38533e+06	2.68647e+06	1.55739e+06	20.78	1.5373e+06	1.29946e+06	1.81006e+06	20.55	-0.23	1.90942
[Similar to: Glycyl-L-leucine; ΔMass: -0.1525 Da]_186.95633_2.312		7952.65	6993.25	6214.57	12.78	9865.26	9103.81	6578.12	13.03	0.25	3.58093	(2E)-3-(3,4-Dihydroxyphenyl)-N-{3-[(4-{[(2E)-3-(4-hydroxy-3-methoxyphenyl)-2-propenoyl]amino}butyl)amino]propyl}acrylamide_484.24479_8.815		716805	1.46571e+06	833294	19.87	383913	625357	1.33394e+06	19.38	-0.49	2.11794
												11-dehydro-2,3-dinor-TXB2_341.19613_10.863		84343.6	73199.9	667731	17.29	2.03858e+06	878189	1.94794e+06	20.53	3.24	23.5211
												AC 45594_209.15353_12.911		2.25308e+06	2.54489e+06	272423	20.15	6.78762e+06	3.05186e+06	1.62715e+06	21.62	1.47	3.48077
												Methylphenobarbital_247.10765_1.955		681266	904637	288625	19.1	80655.1	783482	366549	18.12	-0.98	2.3985
												Triethylene glycol monomethyl ether_165.11291_1.292		1.5943e+06	501684	372799	19.35	381556	375017	465851	18.63	-0.72	3.04781
												APAZIQUONE_289.11829_5.673		951583	1.83862e+06	760000	20.07	360049	393664	158245	18.11	-1.96	38.841
												Cephalosporolide J_217.10725_4.596		123864	48392.1	437478	17.07	1.26126e+06	231651	921982	19.3	2.23	7.46319
												2,2'-(Octadecylimino)diethanol_358.36831_14.585		1.85266e+06	631321	160675	19.13	94122.7	105728	1.55892e+06	17.93	-1.2	1.95118
												tyr-gln_310.13988_3.566		2.35871e+06	1.12874e+06	2.25286e+06	20.79	167203	1.43129e+06	3.39946e+06	19.83	-0.96	1.95281
												Triethylene glycol monomethyl ether_165.11215_2.431		933466	1.27309e+06	659581	19.81	498872	904777	1.0164e+06	19.56	-0.25	1.74638
												Belactosin C_358.19739_6.196		976848	1.35833e+06	575158	19.8	2.25223e+06	400976	2.26396e+06	20.28	0.48	1.59073
												[Similar to: PEG n8; ΔMass: 369.1663 Da]_370.70056_5.992		221127	42082	334826	17.16	136913	475504	1.01834e+06	18.63	1.47	3.30409
												[Similar to: GRH; ΔMass: -212.1523 Da]_157.04711_0.765		449257	453368	631542	18.95	414874	128382	342137	18.01	-0.94	6.18571
												[Similar to: 2-{[(2R,3R,4S,5S,6R)-4,5-dihydroxy-6-(hydroxymethyl)-3-{[(2S,3R,4R,5R,6S)-3,4,5-trihydroxy-6-methyloxan-2-yl]oxy}oxan-2-yl]oxy}-2-(4-hydroxyphenyl)acetonitrile; ΔMass: 143.1785 Da]_301.17572_5.028		263433	1.00739e+06	280304	18.68	794907	1.12232e+06	138930	18.93	0.25	1.19322
												N-Hydroxydecanamide_188.16441_8.651		62586	951425	48140	17.12	393542	411724	43716	17.55	0.43	1.22688
												N-oleoyl isoleucine_396.34738_16.474		275739	268428	647622	18.47	441987	230382	260582	18.19	-0.28	1.65329
												HMBA_201.15982_4.419		2.18142e+06	65550.7	79852.6	17.78	103045	105361	137156	16.8	-0.98	1.71333
												[Similar to: N1-pyrazin-2-yl-4-chlorobenzamide; ΔMass: 4.1121 Da]_238.15495_2.96		2.11089e+06	178897	1.61661e+06	19.69	132990	135338	1.77076e+06	18.27	-1.42	2.24786
												[Similar to: DL-Tryptophan; ΔMass: -21.0918 Da]_205.98724_4.085		980021	2.85222e+06	676387	20.24	402831	197753	474461	18.36	-1.88	16.0712
												Protoporphyrin IX_282.13632_15.467		62700	820776	322966	17.96	1.24244e+06	211742	553562	19.01	1.05	2.1243
												3-Methylsulfolene_150.05833_3.242		4.34265e+06	3.82616e+06	3.15894e+06	21.84	570369	1.27924e+06	4.8427e+06	20.54	-1.3	4.40886
												[Similar to: 2-{[(2R,3R,4S,5S,6R)-4,5-dihydroxy-6-(hydroxymethyl)-3-{[(2S,3R,4R,5R,6S)-3,4,5-trihydroxy-6-methyloxan-2-yl]oxy}oxan-2-yl]oxy}-2-(4-hydroxyphenyl)acetonitrile; ΔMass: -157.9739 Da]_300.19183_4.784		1.44159e+06	1.0969e+06	1.64735e+06	20.39	516368	622241	1.932e+06	19.7	-0.69	3.05019
												UX9640000_82.06506_1.671		452796	781436	389748	18.98	77693.4	169915	346809	17.34	-1.64	12.8773
												Canangalia D_374.21738_10.626		81161	73186.2	153637	16.57	143417	129961	511194	17.69	1.12	5.21755
												[Similar to: NP-008993; ΔMass: -49.0990 Da]_266.15405_10.905		2.75239e+06	4.1475e+06	876921	21.04	324094	1.20938e+06	2.53955e+06	19.93	-1.11	2.71034
												Byrsonic acid_479.33485_15.365		1.29021e+06	2.11e+06	1.16911e+06	20.49	38559.5	233990	1.36353e+06	17.82	-2.67	6.61459
												Gabapentin_213.15967_5.986		744200	380753	1.20693e+06	19.42	283381	354829	1.35672e+06	18.97	-0.45	1.58149
												N~2~-Acetyl-L-ornithine_175.10757_5.081		1.60972e+06	1.30007e+06	1.30334e+06	20.41	1.18642e+06	1.34319e+06	1.45045e+06	20.33	-0.08	1.72284
												Obscuraminol A_278.2479_12.209		978914	1.17473e+06	1.07681e+06	20.03	838455	1.41674e+06	835432	19.93	-0.1	1.41307
												[Similar to: 5-[(1S,3aR,4S,6aR)-4-(3,4,5-trimethoxyphenyl)-hexahydrofuro[3,4-c]furan-1-yl]-2H-1,3-benzodioxole; ΔMass: -161.0251 Da]_240.13441_2.287		2.06235e+06	215444	2.59172e+06	20	589560	1.12079e+06	1.94326e+06	20.05	0.05	1.03247
												(+/-)-nicotine_180.14946_2.408		964233	864927	888035	19.79	382768	723722	683228	19.13	-0.66	10.8817
												7a-acetoxy-15-methoxy-10-O-methyl-deacetyldihydrobotrydial_390.2489_8.654		511346	397721	553918	18.88	596700	884758	971182	19.61	0.73	20.7633
												lactide_145.04952_12.387		3.18902e+06	2.85855e+06	1.98063e+06	21.32	2.25567e+07	1.38916e+07	9.62886e+06	23.78	2.46	253.743
												MFCD02728197_281.14972_3.23		303299	87765	1.62024e+06	18.42	109309	124981	584566	17.61	-0.81	1.65412
												6366A_378.1665_5.094		908516	1.53001e+06	343688	19.58	223990	283010	246068	17.93	-1.65	16.234
												Imazapyr_262.11857_3.498		1.76843e+06	7.73091e+06	1.02675e+06	21.2	5.15e+06	1.99252e+06	1.22368e+06	21.15	-0.05	1.03932
												5,6,7-Trimethoxy-2H-chromen-2-one_237.07571_9.031		583618	585446	42382	17.9	73710.3	79238.6	151808	16.55	-1.35	2.76685
												pentamidine_323.18576_11.755		204216	136321	203468	17.44	404457	262962	917143	18.81	1.37	13.9161
												HC blue 2_286.13989_5.385		2.74218e+06	1.33821e+06	1.4872e+06	20.75	1.18998e+06	251180	2.02575e+06	19.69	-1.06	3.00946
												Asperchondol B_447.25137_10.973		1.90179e+06	1.81926e+06	219851	19.8	2.30437e+06	3.204e+06	1.19902e+06	20.98	1.18	2.8822
												N-acetyl-3,5,11,18-tetrahydroxyoctadecyl-2-amine_376.30585_11.362		63149.9	1.34532e+06	69762.4	17.47	340171	108934	56041.9	16.96	-0.51	1.29347
												5,6-Dimethoxysterigmatocystin_385.09189_9.208		427350	478399	254206	18.51	228413	158326	526853	18.03	-0.48	2.19368
												ArachidoylEthanolamide_356.35267_13.592		1.01948e+06	64907	1.03605e+06	18.64	50934.7	55011.6	1.27816e+06	17.22	-1.42	1.9143
												2S-hydroxy-3-(10Z-tetradecenoyloxy)-propanoic acid_297.20624_12.068		86486.2	1.64605e+06	71152.1	17.72	879178	737692	67664.7	18.43	0.71	1.37349
												5-(N,N-Dimethylcarbamimidamido)-2-oxopentanoic acid_403.23004_1.344		486063	200216	675059	18.62	177003	176302	420358	17.85	-0.77	3.21024
												4-Aminopyridine_95.06026_2.066		331042	216926	546483	18.37	269200	342736	945977	18.76	0.39	1.66663
												Cordycedipeptide A_228.13432_5.101		2.57099e+06	1.52519e+06	1.30264e+06	20.72	1.5552e+06	588587	641054	19.68	-1.04	8.01006
												Cadralazine_142.58946_0.698		325622	109901	235034	17.63	95771.9	287868	402691	17.77	0.14	1.14642
												Muscimol_115.05015_11.87		3.03696e+06	2.78227e+06	249946	20.29	2.99162e+07	1.6596e+07	1.01071e+07	24.03	3.74	23.9889
												[Similar to: (+/-)12(13)-DiHOME; ΔMass: -35.1564 Da]_280.09662_10.659		124254	529807	3.3276e+06	19.2	456422	317325	215279	18.26	-0.94	1.8456
												DL-Lactic Acid_91.03887_0.703		565908	49477.1	312829	17.65	99471.2	93202.1	394212	17.23	-0.42	1.32462
												PROPOFOL GLUCURONIDE_355.17554_8.735		76076.6	59986	66258.7	16.03	72880.4	79836.9	61302.4	16.11	0.08	1.60402
												4-{(Z)-[(5E,8Z,11Z,14Z)-1-Hydroxy-5,8,11,14-icosatetraen-1-ylidene]amino}butanoic acid_390.3006_10.204		35231.1	349327	45376.4	16.33	71480.7	54140.5	42975.4	15.75	-0.58	1.62664
												[Similar to: NP-013663; ΔMass: -54.0104 Da]_277.23748_12.416		456859	410393	148336	18.21	102345	75919.8	224596	16.88	-1.33	7.78065
												Imazapyr_262.11853_4.025		1.25e+06	1.78895e+06	838991	20.23	2.62829e+06	1.17929e+06	777929	20.35	0.12	1.17443
												felbamate_239.10258_8.83		340179	448791	179659	18.2	177539	120664	81659	16.88	-1.32	16.7971
												AM9627000_166.05002_1.825		71279.2	51213.7	62098.2	15.9	51441.8	54194.2	62196.6	15.77	-0.13	2.13973
												E-64_358.2077_2.186		157693	176728	663277	18.01	53804.1	298231	187932	17.14	-0.87	2.32726
												[Similar to: 3-[(4-hydroxyphenyl)methyl]-octahydropyrrolo[1,2-a]pyrazine-1,4-dione; ΔMass: -16.0313 Da]_262.11865_4.026		1.25e+06	1.78895e+06	838991	20.23	2.54585e+06	1.17929e+06	777929	20.34	0.11	1.15282
												[Similar to: DL-Tryptophan; ΔMass: 0.9508 Da]_206.04794_2.456		913961	346254	753172	19.24	166697	213295	707806	18.16	-1.08	4.26061
												Amipylo_303.18028_8.77		106848	86410.2	468638	17.31	437429	462421	341791	18.65	1.34	6.16557
												Gemfibrozil_251.16414_11.583		460852	537932	448220	18.87	500477	114047	112379	17.5	-1.37	7.73449
												Aminolevulinic acid_114.05471_19.339		910366	881261	4.56146e+06	20.56	788155	846679	806485	19.63	-0.93	3.28283
												N-Acetyl-L-histidine_198.08727_0.739		200500	133840	165899	17.33	106041	129150	202496	17.1	-0.23	1.92138
												[Similar to: 2-{[(2R,3R,4S,5S,6R)-4,5-dihydroxy-6-(hydroxymethyl)-3-{[(2S,3R,4R,5R,6S)-3,4,5-trihydroxy-6-methyloxan-2-yl]oxy}oxan-2-yl]oxy}-2-(4-hydroxyphenyl)acetonitrile; ΔMass: 107.1331 Da]_283.15302_5.191		167250	98219.1	38126.7	16.38	52015.2	90475.4	41092.9	15.82	-0.56	2.12693
												Bunazosin_374.21707_11.509		36022.2	34441.8	471834	16.35	181389	37686.2	137648	16.58	0.23	1.13513
												[Similar to: NP-013663; ΔMass: -36.0962 Da]_295.15167_9.156		42180.5	387386	236183	17.26	345869	75594.2	45246.8	16.69	-0.57	1.45636
												Butyryl-L-homoserine lactone_172.09674_19.442		89262.4	265207	275858	17.51	173185	101192	817920	17.89	0.38	1.35705
												4-Aminophenol_142.08624_19.374		506560	410412	398688	18.73	205084	369936	97264.2	17.57	-1.16	9.08909
												Succinimide_132.06543_19.35		298217	349288	218735	18.11	357990	324061	550737	18.61	0.5	5.49626
												BZ8580500_139.08643_0.721		72061.5	64259	39505.9	15.79	44661.9	43422.5	186564	16.12	0.33	1.46641
												Aurantiomide A_373.18597_8.718		36578.1	29581.5	32674.8	15	40272.7	61668.1	52383.4	15.63	0.63	28.6098
												N-Acetylvaline_142.08644_19.325		506560	408501	397011	18.73	205084	369936	41280.9	17.16	-1.57	5.743
												Trimethylamine_60.08082_10.151		43783.7	107817	1477142	17.54	50336.3	75488.5	143510	16.32	-1.22	2.07266
												4-(Stearoylamino)butanoic acid_370.33198_16.256		29338.5	139058	143340	16.35	53403.6	33755	86499.1	15.72	-0.63	2.01323
												Diallylamine_98.09624_19.265		264687	39611.6	105184	16.66	24076.1	60337.3	13858.3	14.73	-1.93	7.82613
												Benzamide_139.0867_3.467		243238	43100.2	269362	17.11	50873.1	51643.6	72513.3	15.81	-1.3	4.716
												3-Carboxyindole_162.05499_4.203		164841	310008	24731.9	16.72	633871	114783	193850	17.88	1.16	2.33652

## Sheet: Table S2
Table S2. KEGG pathway analysis of potential differential metabolites.
negative	p-value1	FDR2	Frequent/Infrequent3	positive	p-value1	FDR2	Frequent/Infrequent3
Fructose and mannose metabolism	0.00042566	0.0049661	Up	Phenylalanine metabolism	0.00021402	0.0035313	Down
Galactose metabolism	0.00042566	0.0049661	Up	Phenylalanine, tyrosine and tryptophan biosynthesis	0.00021402	0.0035313	Down
Amino sugar and nucleotide sugar metabolism	0.00042566	0.0049661	Down	Propanoate metabolism	0.001119	0.009879	Down
Pentose phosphate pathway	0.049273	0.36352	Down	D-Glutamine and D-glutamate metabolism	0.0011975	0.009879	Up
Primary bile acid biosynthesis	0.051931	0.36352	Up	Pantothenate and CoA biosynthesis	0.0031118	0.020538	Down
D-Glutamine and D-glutamate metabolism	0.10454	0.60981	Up	Ubiquinone and other terpenoid-quinone biosynthesis	0.0057274	0.021791	Down
Phenylalanine, tyrosine and tryptophan biosynthesis	0.13725	0.68626	Down	Tyrosine metabolism	0.0057274	0.021791	Down
Citrate cycle (TCA cycle)	0.17924	0.71605	Up	Valine, leucine and isoleucine biosynthesis	0.005943	0.021791	Down
Phenylalanine metabolism	0.1993	0.71605	Down	Valine, leucine and isoleucine degradation	0.005943	0.021791	Down
Arginine biosynthesis	0.20459	0.71605	Up	beta-Alanine metabolism	0.010744	0.035201	Down
Butanoate metabolism	0.28897	0.91945	Up	Aminoacyl-tRNA biosynthesis	0.011734	0.035201	Down
Alanine, aspartate and glutamate metabolism	0.38388	0.99438	Up	Alanine, aspartate and glutamate metabolism	0.044898	0.11397	Down
Pyrimidine metabolism	0.42474	0.99438	Up	Selenocompound metabolism	0.044898	0.11397	Down
Nicotinate and nicotinamide metabolism	0.48184	0.99438	Up	Pyrimidine metabolism	0.11043	0.25473	Down
Purine metabolism	0.48819	0.99438	—	Histidine metabolism	0.11579	0.25473	Down
Valine, leucine and isoleucine biosynthesis	0.55149	0.99438	Up	Tryptophan metabolism	0.18992	0.3917	Down
Aminoacyl-tRNA biosynthesis	0.58572	0.99438	Down	Lysine degradation	0.21487	0.39392	Down
Histidine metabolism	0.68892	0.99438	Down	Biotin metabolism	0.21487	0.39392	Down
Pantothenate and CoA biosynthesis	0.75522	0.99438	—	Arginine and proline metabolism	0.24112	0.41879	Down
beta-Alanine metabolism	0.77075	0.99438	—	Arachidonic acid metabolism	0.25506	0.42085	Up
Cysteine and methionine metabolism	0.77886	0.99438	Up	D-Arginine and D-ornithine metabolism	0.29775	0.46789	Down
Glycolysis / Gluconeogenesis	0.78769	0.99438	Up	Vitamin B6 metabolism	0.34588	0.51881	Down
Pyruvate metabolism	0.78769	0.99438	Up	Arginine biosynthesis	0.37973	0.54483	Down
Tryptophan metabolism	0.79574	0.99438	Down	Cysteine and methionine metabolism	0.4709	0.64749	Down
Propanoate metabolism	0.81381	0.99438	Up	Glycerophospholipid metabolism	0.49426	0.65242	Up
Ubiquinone and other terpenoid-quinone biosynthesis	0.85787	0.99438	—	Biosynthesis of unsaturated fatty acids	0.53773	0.6825	—
Glutathione metabolism	0.90869	0.99438	Down	Caffeine metabolism	0.55859	0.68273	Down
Nitrogen metabolism	0.90869	0.99438	Down	Glutathione metabolism	0.60943	0.71825	Down
Sphingolipid metabolism	0.92214	0.99438	Up	Glycine, serine and threonine metabolism	0.65329	0.74339	Up
Glycine, serine and threonine metabolism	0.96768	0.99438	Up	Nicotinate and nicotinamide metabolism	0.75358	0.82894	Down
Tyrosine metabolism	0.97464	0.99438	Down	Sphingolipid metabolism	0.83411	0.8428	Up
Porphyrin and chlorophyll metabolism	0.97816	0.99438	—	alpha-Linolenic acid metabolism	0.84231	0.8428	Up
Caffeine metabolism	0.98024	0.99438	—	Purine metabolism	0.8428	0.8428	—
Glyoxylate and dicarboxylate metabolism	0.98517	0.99438	Up
Arginine and proline metabolism	0.99438	0.99438	Up
1 p-value calculated from the enrichment analysis.
2 p-value adjusted using Benjamini-Hochberg procedure.
3The enrichment level between Frequent and Infrequent: Up, a more prevalent in Frequent group; Down, a more prevalent in Infrequent group
